# Supplementary material
Source: PubMed Central journal article supplement (PMC4343126)
Supplement: pnas.1416756112.sapp.pdf [file pnas.1416756112.sapp.pdf]

## **Supplementary Information**

### **Highly multiplexed profiling of single-cell effector functions reveals deep functional heterogeneity in response to pathogenic ligands**

Yao Lu<sup>1,8</sup>, Qiong Xue<sup>1,8</sup>, Markus R. Eisele<sup>1,2</sup>, Endah Sulistijo<sup>1</sup>, Kara Brower<sup>3</sup>, Lin Han<sup>1</sup>, El-ad David Amir<sup>4</sup>, Dana Pe'er<sup>4</sup>, Kathryn Miller-Jensen<sup>1,5,6\*</sup> & Rong Fan<sup>1,6,7\*</sup>

<sup>1</sup> Department of Biomedical Engineering, Yale University, New Haven, CT 06520, USA

<sup>2</sup> Institute for System Dynamics, University of Stuttgart, Stuttgart, Germany

<sup>3</sup> Isoplexis, New Haven, CT 06511, USA

<sup>4</sup> Department of Biological Sciences, Columbia University, New York, New York, USA.

<sup>5</sup> Department of Molecular, Cellular and Developmental Biology, Yale University, New Haven, CT 06520, USA

<sup>6</sup> Yale Comprehensive Cancer Center, New Haven, CT 06520, USA

<sup>7</sup> Yale Stem Cell Center, Yale School of Medicine, New Haven, CT 06520, USA

<sup>8</sup> These authors contributed equally to this work.

All correspondence should be addressed to KMJ ([kathryn.miller-jensen@yale.edu](mailto:kathryn.miller-jensen@yale.edu)) and RF ([rong.fan@yale.edu](mailto:rong.fan@yale.edu))

#### **List of Supporting Information Documents**

**Fig. S1 . Microchamber array chip.** **a**, Picture of the assembly of a complete single cell secretomic analysis device. **b**, Specifications of the microchamber array chip. It indicates the number of microchambers per chip and the dimensions of microchambers. **c**, Stitched phase contrast image showing the whole microchip and the select region with a block of microchambers loaded with U937-derived macrophage cells.

**Fig. S2 Antibody barcode chip for 42-plex protein detection in single cells.** **a**, Representative scanned image with three colors showing protein detection with the antibody barcode array. **b**, Scanned fluorescence images showing three channels (blue, green and red) separately. **c**, Organization of 42 antibodies used in this study: For detection antibodies, 42 antibodies are categorized into 3 equal groups based on their detection colors: 488blue, 532green, 635red (biotin conjugated, to react with streptavidin APC for red color detection). For

**Fig. S3 Spectral compensation between blue (Alexa fluor 488) and green (Alexa fluor 532) channels.** **a**, Alexa fluor 488 conjugate was spotted onto poly-l-lysine glass slide and imaged with the microarray scanner using both blue and green channels. Due to spectral overlap between Alexa fluor 488 and 532 dyes, fluorescence signals in both blue channel (real signal) and green channel (crosstalk) would be detected. The blue channel signal and green channel signal showed consistent correlation between each other (R=99%) and compensation equation can thus be extracted; **b**, correlation between real signal from 532 channel and overlap from 488 channel for Alexa fluor 532 conjugate. Similarly, Alexa fluor 532 was spotted on a glass slide and imaged with both channels to quantify spectral overlap and describe the compensation equation. The algorithms were initially designed for spectral overlap compensation in multicolore flow cytometric analysis.

**Fig. S4 Standard titration curves for all proteins.** The titration curves were obtained using recombinant proteins. These curves have been fit with a 4PL curve, which is standard for ELISA. Fluorescence intensity represents the original photon counts averaged from 16 spots for each protein.

**Fig. S5 Cross-reactivity check for all proteins.** Most of the antibodies used in this study are monoclonal antibodies to ensure good specificity and reduced cross reactivity. The test was conducted by spiking a single antigen (recombinant protein) in a solution applied to a full capture antibody microarray containing all 42 capture antibodies, followed by detection with a mixture of all detection Abs. Some antibodies showed relatively weak signals such as MMP-2, IL-29, which are probably caused by low reactivity of recombinant proteins.

**Fig. S6 Flow chart depicting the procedure and timeline for preparing U937 derived macrophages and performing single-cell protein secretion profiling.** The differentiation was conducted in a conventional cell culture dish. The differentiated cells were trypsinized and resuspended to prepare for single-cell secretion assay. Single-cell suspension was divided into two portions. One was directly loaded to microchip and the other was added with LPS to induce TLR4 activation, which is a well characterized process and results in the secretion of a large panel of cytokines. Thus, it serves as an excellent model system to test the new technology platform – single-cell, 42-plex protein secretion profiling.

**Fig. S7 Surface antigen expression confirms successful differentiation of U937 monocytes to macrophages.** These scatter plots show flow cytometric analysis of cell surface markers CD11b and CD14 in the U937 cells treated by PMA (50 ng/mL) for 48 hr.

**Fig. S8 Population level protein secretion profile.** Protein secretion was measured on U937 derived macrophage cells at the population level using a conventional micro titer plate (cell density  $\sim 10^6$ /mL). Both non-stimulated and LPS stimulated cells were measured.

**Fig. S9 Vertical scatter plots showing cytokine secretion levels and frequency in all single cells and for all protein measured.** It includes complete single-cell cytokine vertical scatter plots showing in Fig. 2B. The plots compare single-cell protein secretion at the basal level (blue dots) and upon LPS stimulation (red dots). The dashed line marks the “gate” defined as (zero-cell data average + 2 STDV). The data were shifted vertically to match the “gates” obtained from two microchips.

**Fig. S10 Comparison between the microchip data and the flow cytometric ICS data.** The major secreted proteins identified by single-cell microchip experiments were measured using both methods. The raw data for fraction of cytokine-secreting cells in both basal and LPS stimulated cells was compared. The correlation between ICS and our assay is moderate due to several reasons. (1) The microchip assay measures the amount of protein secreted by a cell, whereas ICS measures the protein synthesized but trapped inside a cell, representing a different biological process. (2) We used a sandwich immunoassay, which requires two different epitopes of a protein being recognized to give rise to a positive signal and thus provides higher or more stringent specificity than intracellular staining. (3) Our microchip assay eliminates paracrine-induced amplification of protein secretion all the way in the beginning, which is different from the standard ICS assay. Thus, detection threshold for a protein secreting cell differs substantially using these two methods. However, we observed that the response to LPS stimulation measured by the increase in the fraction of cells secreting a given cytokine exhibits good correlation between the two methods (Fig. 2d).

**Fig. S11 Cell viability assay.** The cells were stained with Calcein AM (Life technologies, USA) before loading into PDMS microwells. Then they were imaged at 0, 4, 8, 12 and 19 hr. One column was randomly chosen and quantified (220 microchannels, around 350 cells in total). The cells showing positive green fluorescence signal were scored as viable. The result showed that 90% of the cells were still alive after 19 hr incubation. Considering the dye may be toxic to cells and cells were imaged at non-tissue culture environment for 1 hr in each imaging (5 hr in total), the cell viability is estimated higher than 90%.

**Fig. S12 Cell hypoxia assay.** Hypoxia test of U937 macrophage cells after 24 hr incubation in enclosed PDMS microwells with hypoxia fluorescence probe LOX-1 (SCIVAX, USA). The results showed that less than 1 % (2 cells positive out of 351 cells) of cells enclosed showed positive with hypoxia fluorescence dye, which indicates excellent oxygen permeability of PDMS can ensure cells be cultured in normoxia condition all through single cell experiment.

**Fig. S13 Effect of substrate mechanical property on protein secretion.** Comparison of U937 populational protein secretion profiles cultured on the polystyrene surface in a 96 well plate vs. a standard PDMS elastomer surface (prepolymer: initiator = 10:1). PDMS is nontoxic, biocompatible, transparent elastomer and has been widely used in biological and biomedical research. Polystyrene is a routine material used in conventional well plate experiment. The results indicate the U937 macrophage cells exhibited very similar protein secretion patterns and intensity on both substrates. The protein secretion profiles measured in cells cultured on two different substrates showed highly correlated with each ( $R > 0.99$  and  $0.94$  in basal and LPS stimulated protein secretion tests, respectively).

**Fig. S14. Heatmap showing MIF-secreting population is largely anti-correlated with proinflammatory cytokine-secreting populations.** The plot is from the data shown in Figure 2a and apparently MIF is anti-correlated with LPS activation.

**Fig. S15. viSNE maps showing the high-dimensional clustering of single cells (U937-derived macrophages) at the basal level and stimulated with different TLR ligands.** It shows viSNE structure maps for U937 derived macrophage cells at the basal state and under the stimulation of different TLR ligands (basal, TLR4 by LPS, TLR1/2 by PAM3, TLR3 by poly IC).

**Fig. S16 Protein distribution in the viSNE maps of U937-derived macrophages at the basal level and stimulated with different TLR ligands.** Cytokine functions in all subpopulations identified by the viSNE analysis for U937 derived macrophage cells under the stimulation of different TLR ligands (basal, TLR4 by LPS, TLR1/2 by PAM3, TLR3 by poly IC). The figures are arranged in the following sequence: combined (top) vs basal (middle left) vs LPS stimulated (middle right) vs PAM3 stimulated (bottom left) vs poly IC stimulated (bottom right).

**Fig. S17 Single-cell polyfunctionality in response to LPS stimulation.** It shows polyfunctionality analysis of U937 macrophage (control and LPS stimulated), in which a wide variety of single cell poly-functionality was observed and U937 derived macrophage cells showed more poly-functionality upon LPS stimulation.

**Figure S18.** Correlation analysis indicates increased co-secretion of multiple cytokines in U937-derived macrophages in response to LPS stimulation. Upper panel: basal cells. Lower panel: LPS stimulated cells.

**Fig. S19 Heatmap summarizing the frequency (%) of proteins-secreting cells in the whole population.** U937-derived macrophage cells at the basal level and the cells stimulated by LPS, PAM3 or polyIC were measured for all 42 cytokines. The frequency of cells secreting a given cytokine is shown as the color intensity.

**Fig. S20 Principle Component Analysis of the samples in a triplicate basal vs. LPS treatment experiment.** Six independent single-cell protein secretion experiments were conducted on U937-derived macrophages. Three were measured in the basal condition (control\_t1, 2, and 3) and three were measured on the macrophage cells treated by LPS for 20 hr.

**Fig. S21. viSNE maps for primary macrophage cells derived from a healthy donor.** viSNE structure maps showing primary macrophage under the stimulation of different TLR ligands(basal, TLR4 by LPS, TLR2 by PAM3, TLR3 by poly IC).

**Fig. S22. Protein distribution in the viSNE maps for primary macrophages derived from a healthy donor.** Cytokine functions in all primary macrophage subpopulations identified by the viSNE analysis. U937 derived macrophage under the stimulation of different TLR ligands (basal, TLR4 by LPS, TLR2 by PAM3, TLR3 by poly IC).

**Table S1:** Summary of antibodies (name, clone, company, catalog) used in this study.

**Table S2:** List of all proteins (full name and their functions in human physiology) incorporated in the microchip platform.

**Table S3:** Statistical analysis of protein signals detected from single U937-derived macrophage cells (basal vs LPS stimulation).

**a**

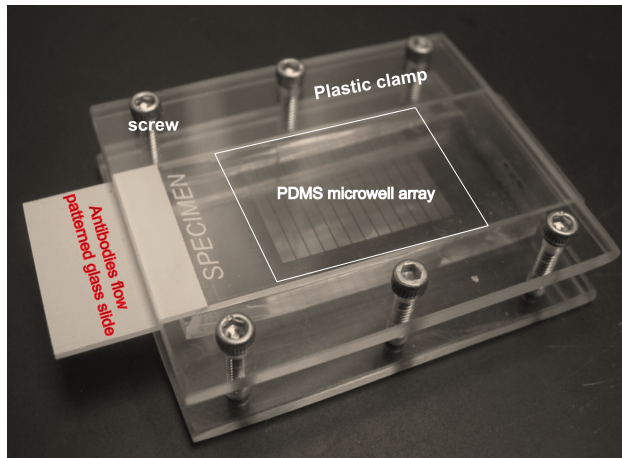

**b**

#### Device Design Parameters

- Microarray chamber array area: 2cm x 3cm
- Each block has 426 microchambers and 13 Blocks total
- Total number of microchambers per chip: 5538
- Microchamber dimensions: 20 $\mu$ m x 17 $\mu$ m x 1.8mm (WxHxL)

**c**

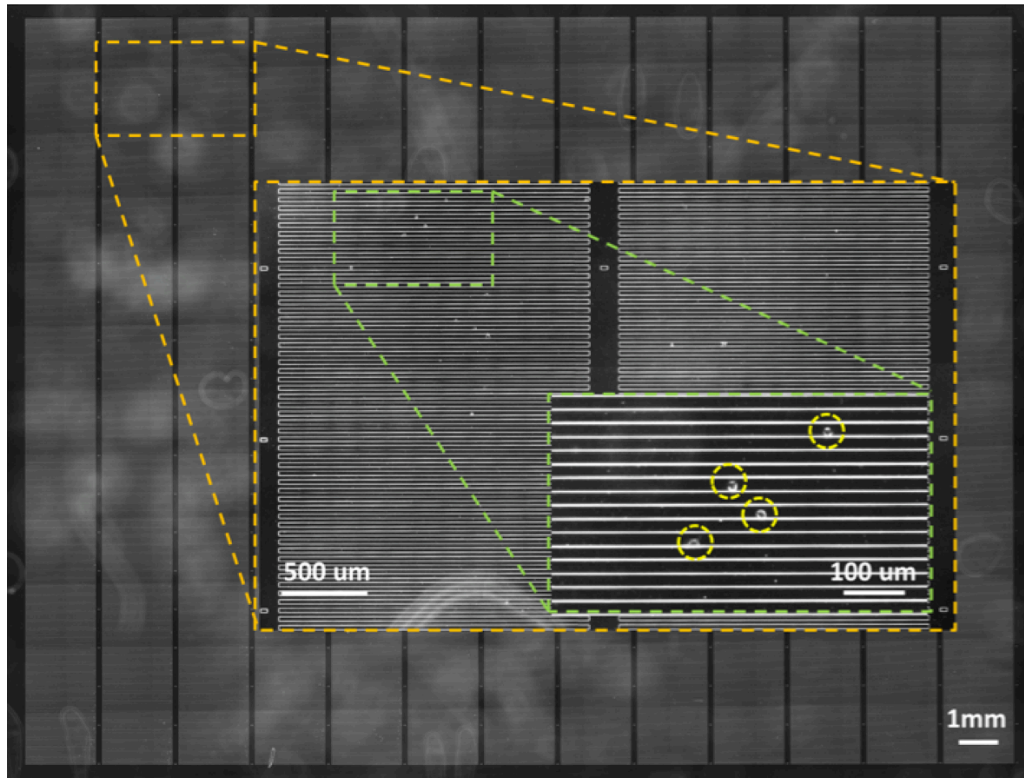

**Fig.S1 . Microchamber array chip.** **a**, Picture of the assembly of a complete single cell secretomic analysis device. **b**, Specifications of the microchamber array chip. It indicates the number of microchambers per chip and the dimensions of microchambers. **c**, Stitched phase contrast image showing the whole microchip and the select region with a block of microchambers loaded with U937-derived macrophage cells.

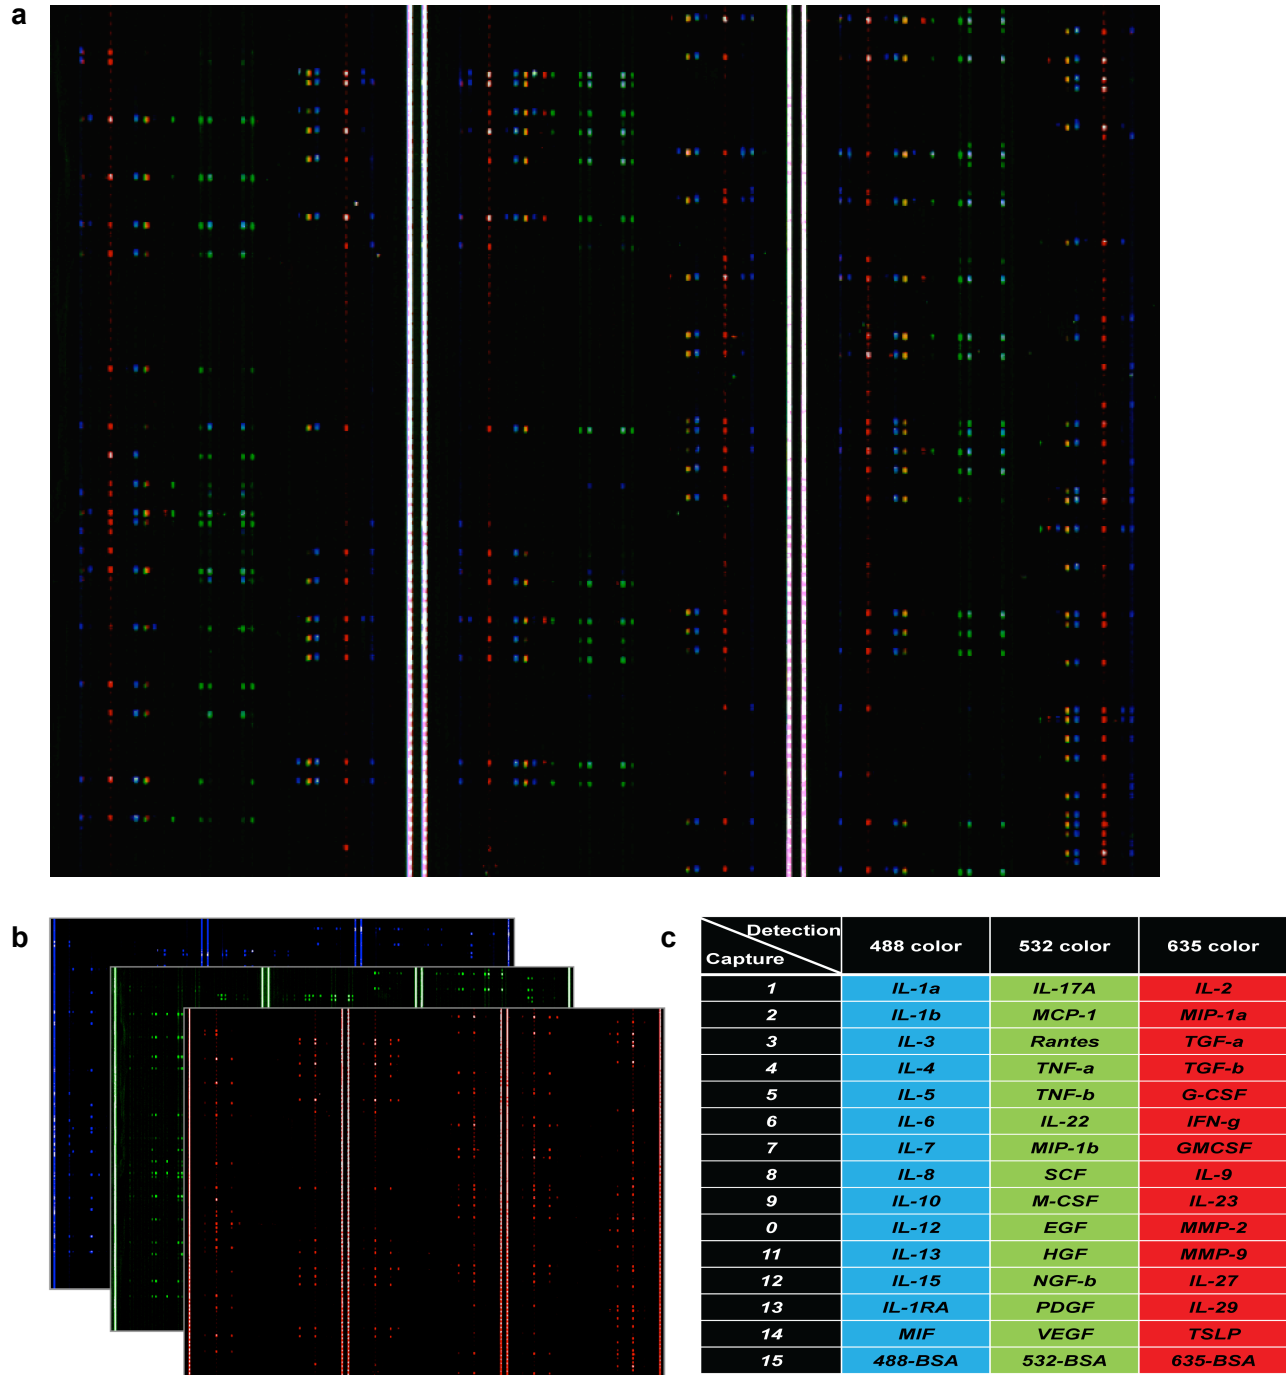

**Fig.S2 Antibody barcode chip for 42-plex protein detection in single cells. a.** Representative scanned image with three colors showing protein detection with the antibody barcode array. **b,** Scanned fluorescence images showing three channels (blue, green and red) separately. **c,** Organization of 42 antibodies used in this study: For detection antibodies, 42 antibodies are categorized into 3 equal groups based on their detection colors: 488blue, 532green, 635red (biotin conjugated, to react with streptavidin APC for red color detection). For capture antibodies, they are organized into 14 mixed groups: each has one individual capture antibody corresponding to blue, green, red detection antibodies respectively.

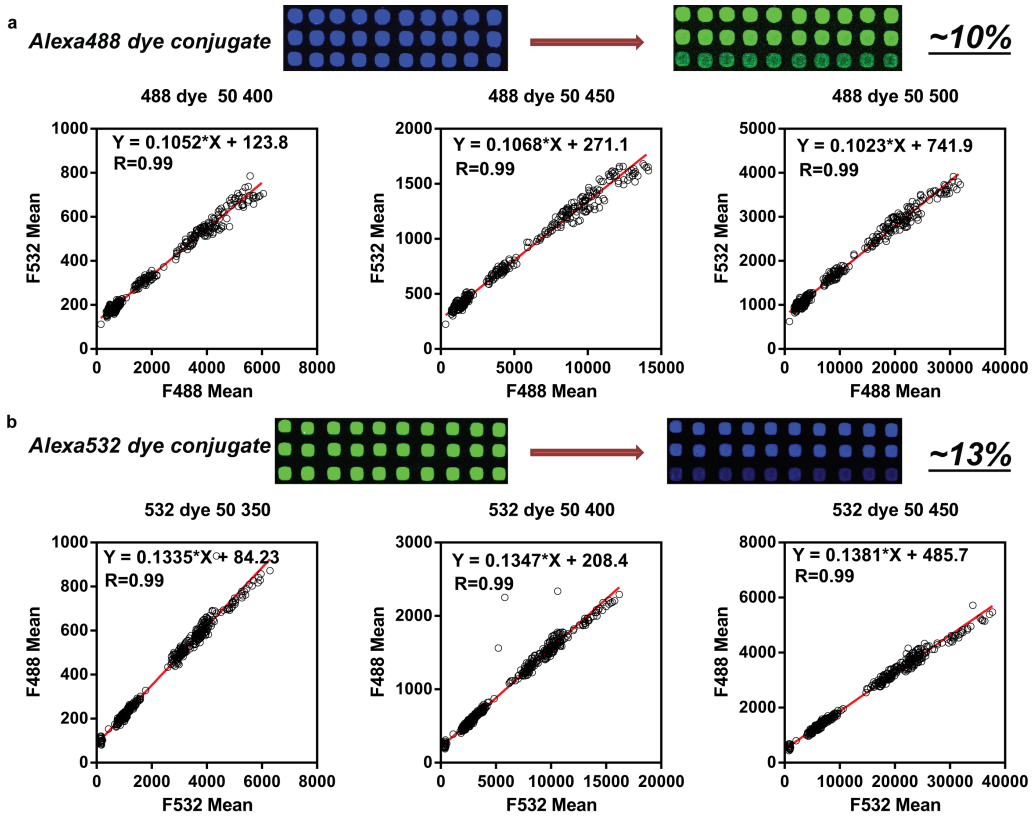

**Fig. S3 Spectral compensation between blue (Alexa fluor 488) and green (Alexa fluor 532) channels.** **a**, Alexa fluor 488 conjugate was spotted onto poly-l-lysine glass slide and imaged with the microarray scanner using both blue and green channels. Due to spectral overlap between Alexa fluor 488 and 532 dyes, fluorescence signals in both blue channel (real signal) and green channel (crosstalk) would be detected. The blue channel signal and green channel signal showed consistent correlation between each other ( $R=99\%$ ) and compensation equation can thus be extracted; **b**, correlation between real signal from 532 channel and overlap from 488 channel for Alexa fluor 532 conjugate. Similarly, Alexa fluor 532 was spotted on a glass slide and imaged with both channels to quantify spectral overlap and describe the compensation equation. The algorithms were initially designed for spectral overlap compensation in multicolore flow cytometric analysis.

$$(1) F488 = T488 + T532 \cdot a + A$$

$$(2) F532 = T532 + T488 \cdot b + A$$

The true signal from each channel can be calculated with formula (3) and (4) respectively:

$$(3) T488 = [F488 - A - (F532 - B) \cdot a] / (1 - ab)$$

$$(4) T532 = [F532 - B - (F488 - A) \cdot b] / (1 - ab)$$

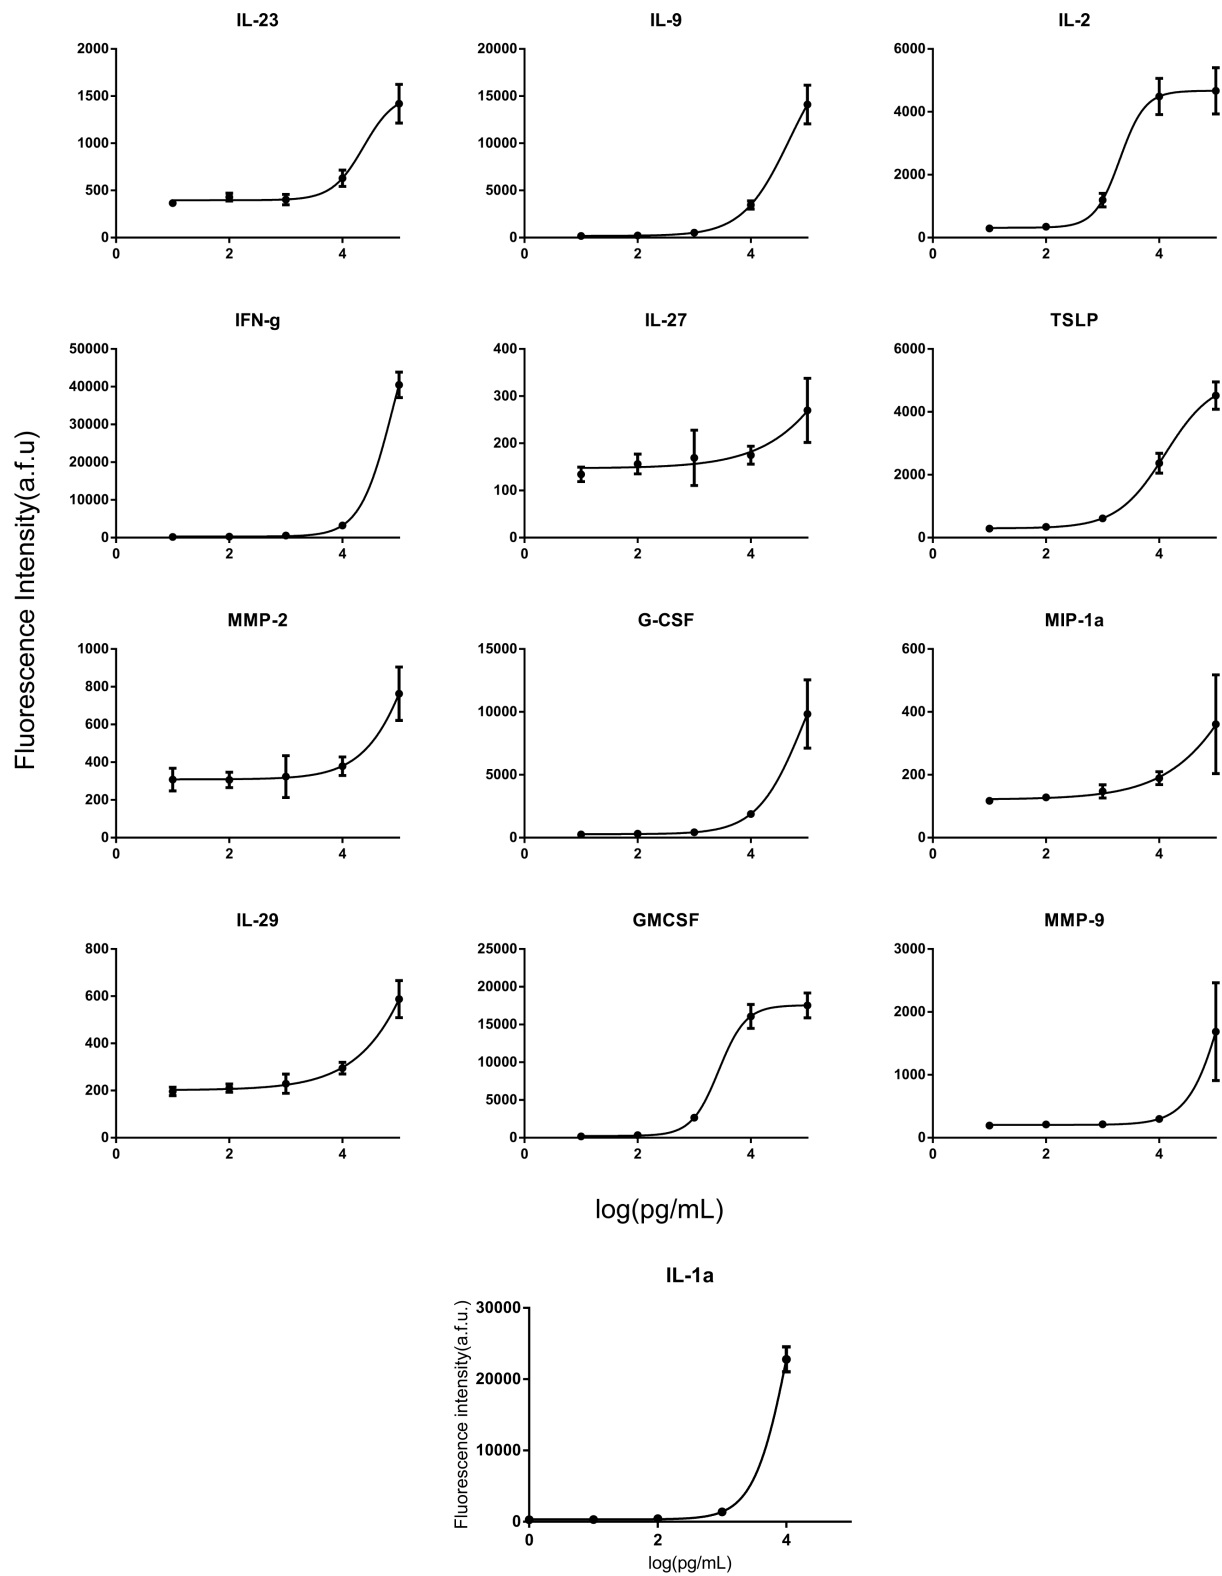



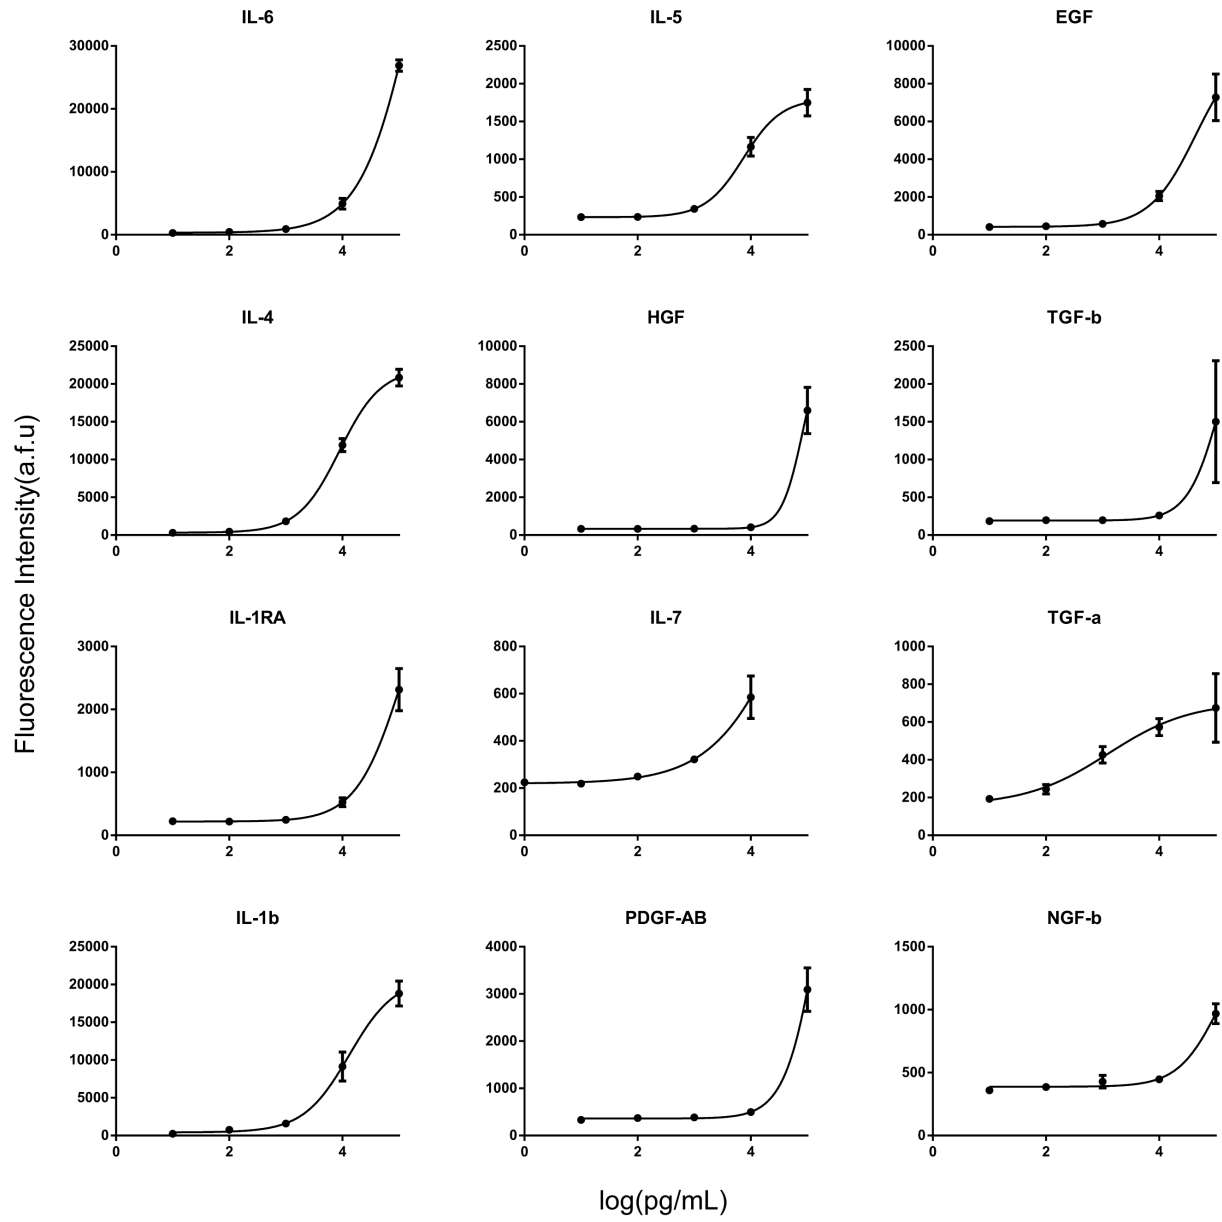

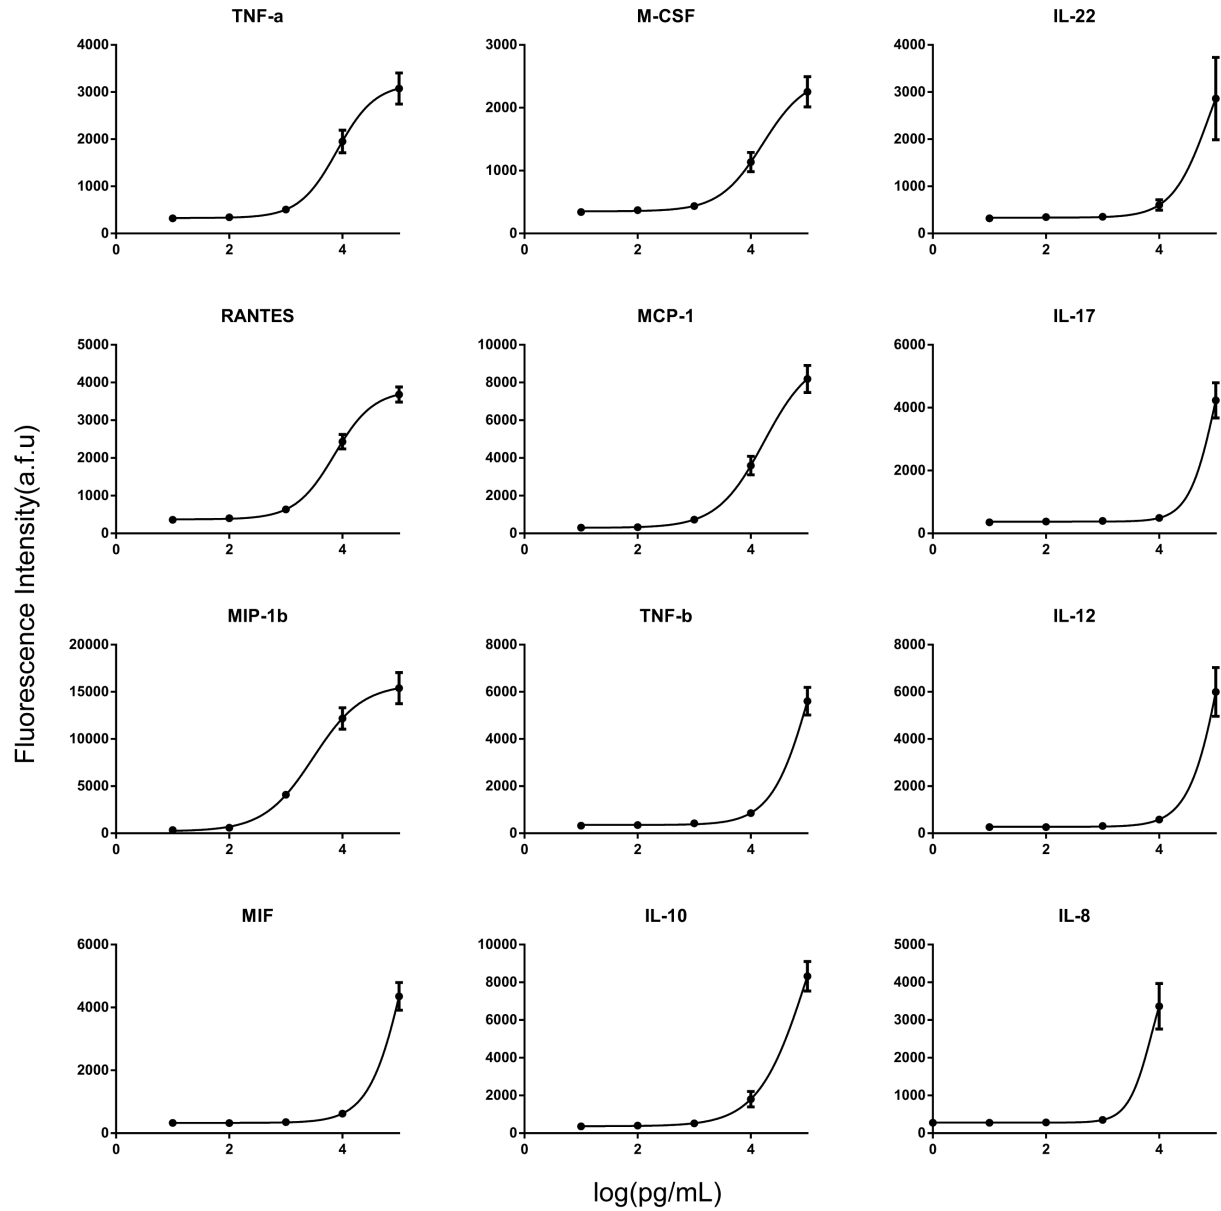

**Fig. S4 Standard titration curves.** The titration curves were obtained using recombinant proteins. These curves have been fit with a 4PL curve, which is standard for ELISA. Fluorescence intensity represents the original photon counts averaged from 16 spots for each protein.

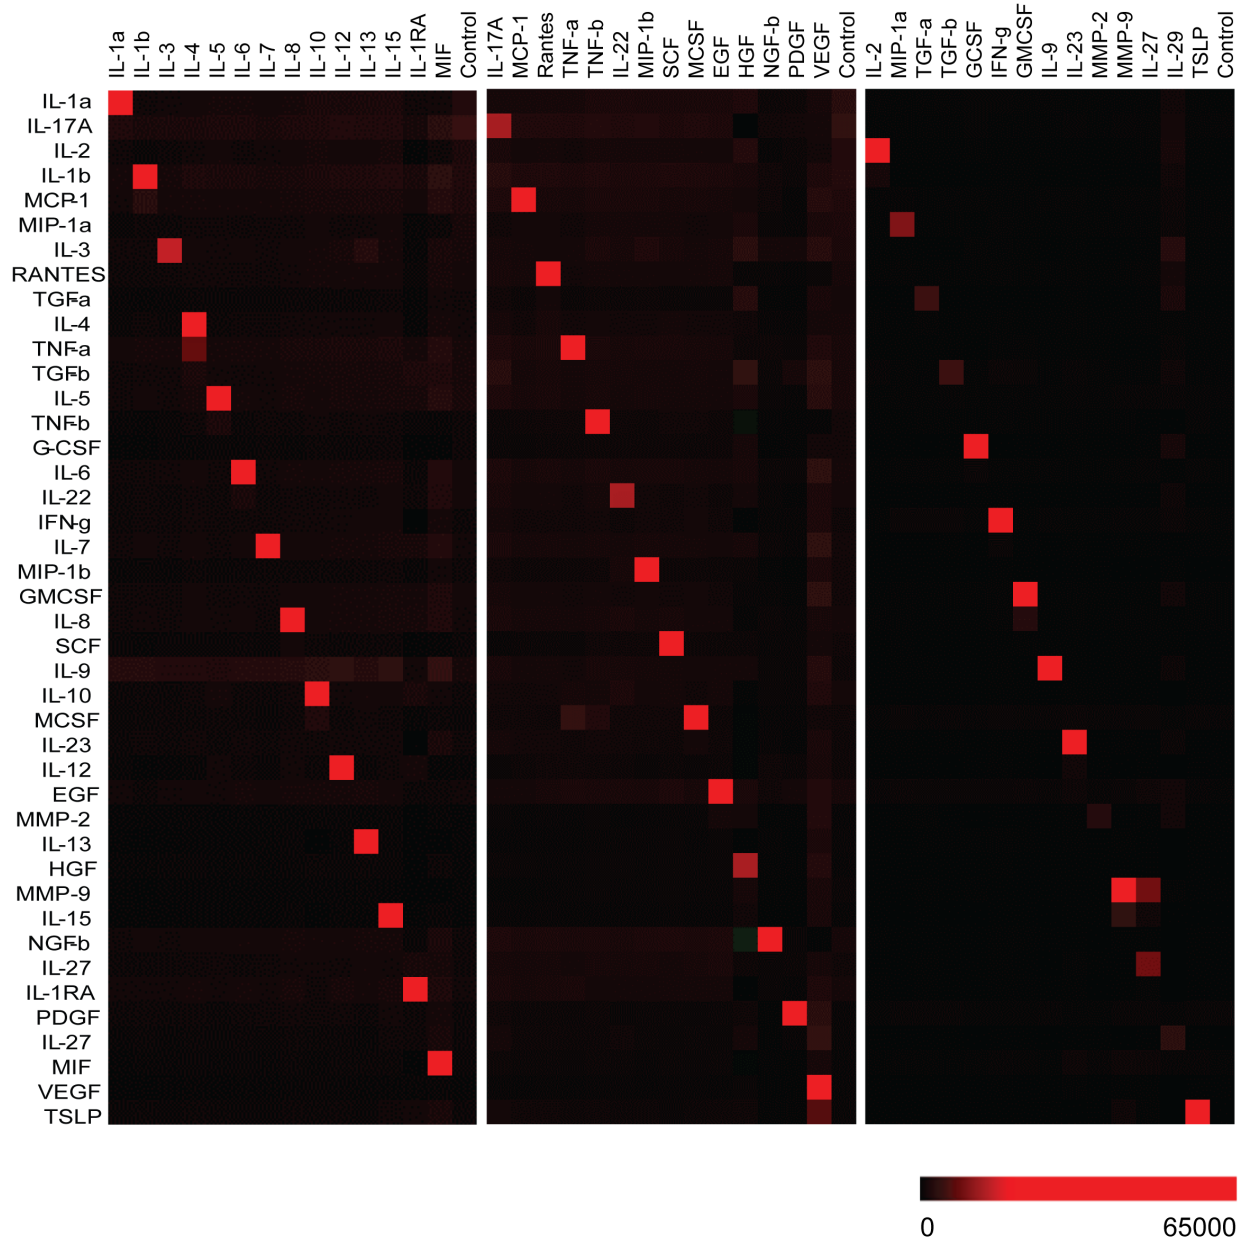

**Fig. S5 Cross-reactivity check for all 42 proteins.** Most of the antibodies used in this study are monoclonal antibodies to ensure good specificity and reduced cross reactivity. The test was conducted by spiking a single antigen (recombinant protein) in a solution applied to a full capture antibody microarray containing all 42 capture antibodies, followed by detection with a mixture of all detection Abs. Some antibodies showed relatively weak signals such as MMP-2, IL-29, which are probably caused by low reactivity of recombinant proteins.

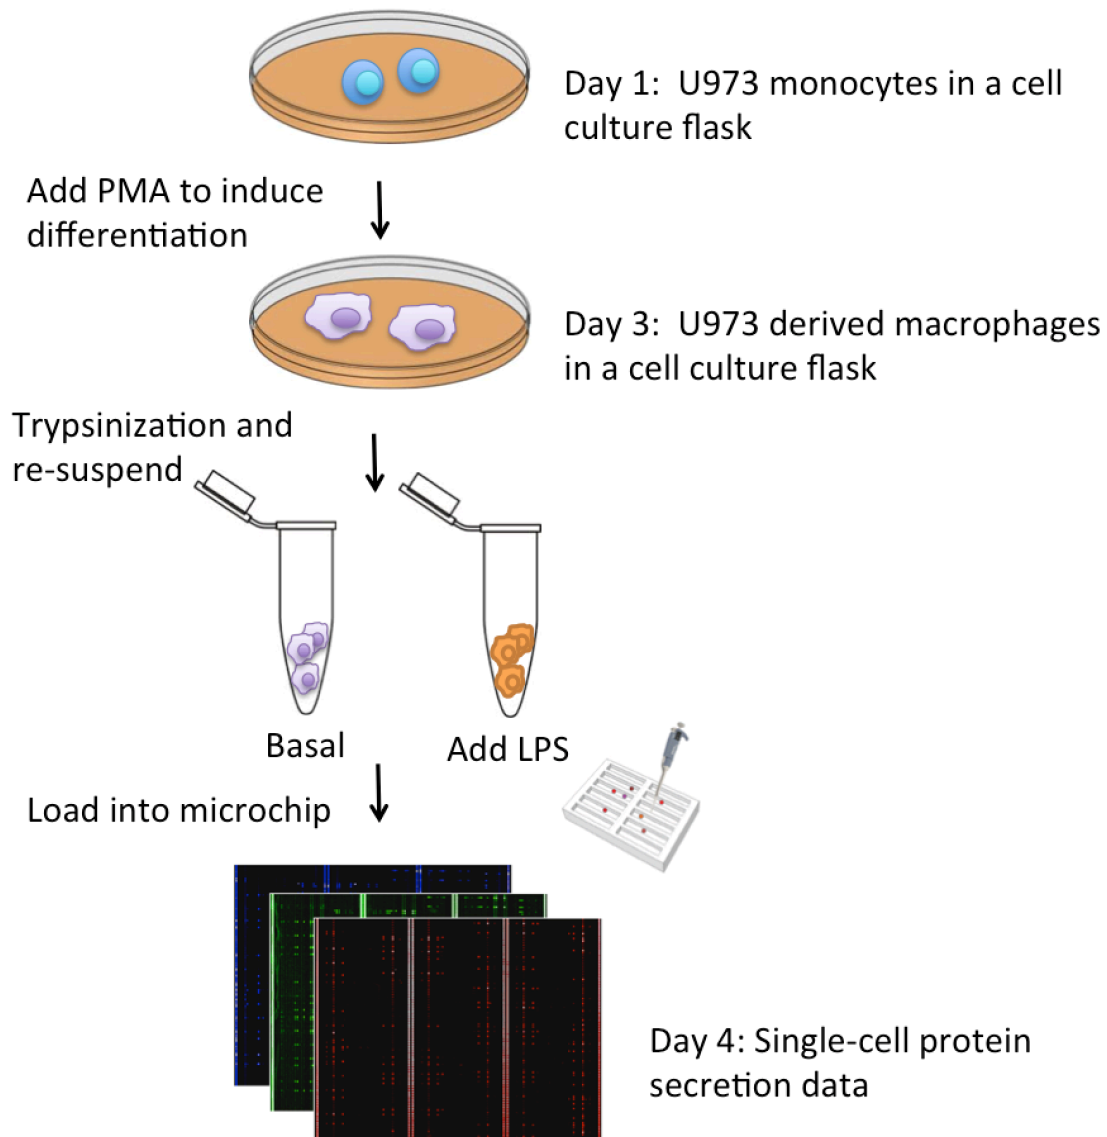

**Fig. S6 Flow chart depicting the procedure and timeline for preparing U937 derived macrophages and performing single-cell protein secretion profiling.** The differentiation was conducted in a conventional cell culture dish. The differentiated cells were the trypsinized and resuspended to prepare for single-cell secretion assay. Single-cell suspension was devised into two portions. One was direct loaded to microchip and the other was added with LPS to inductate TLR4 activation, which is a well characterized process and results in the secretion of a large panel of cytokines. Thus, it serves as an excellent model system to test the new technology platform – single-cell, 42-plex protein secretion profiling.

U937 cells at Day 1

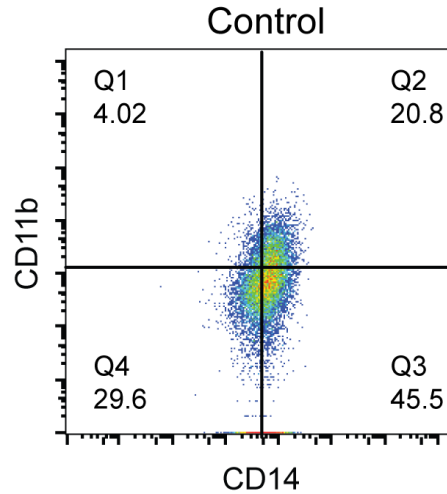

U937 cells at Day 2  
after PMA treatment  
for 24 hrs

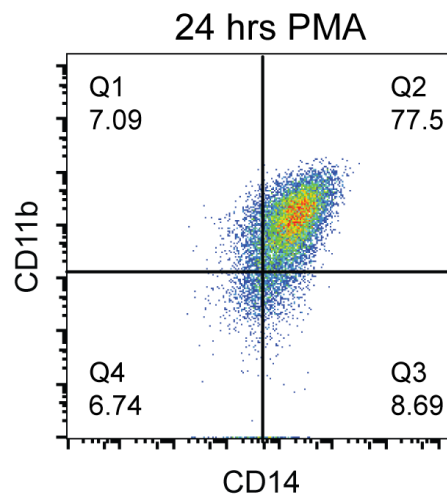

U937 cells at Day 3  
after PMA treatment  
for 48 hrs

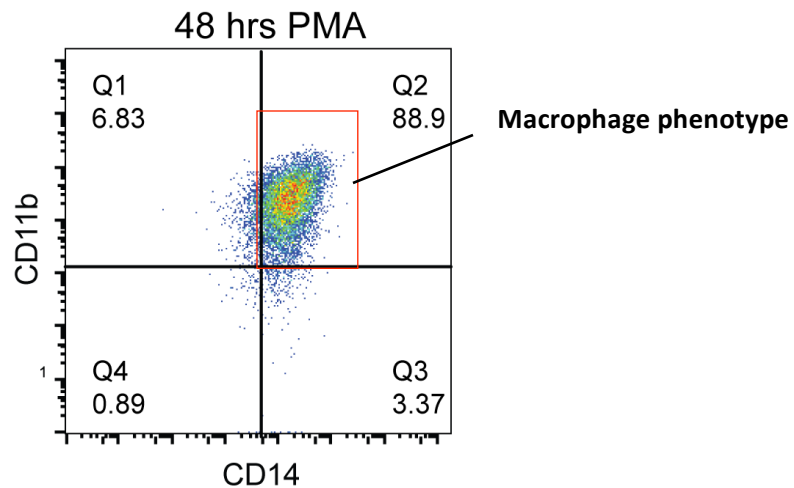

**Fig. S7 Surface antigen expression confirms successful differentiation of U937 monocytes to macrophages.** These scatter plots show flow cytometric analysis of cell surface markers CD11b and CD14 in the U937 cells treated by PMA (50 ng/mL) for 48 hr.

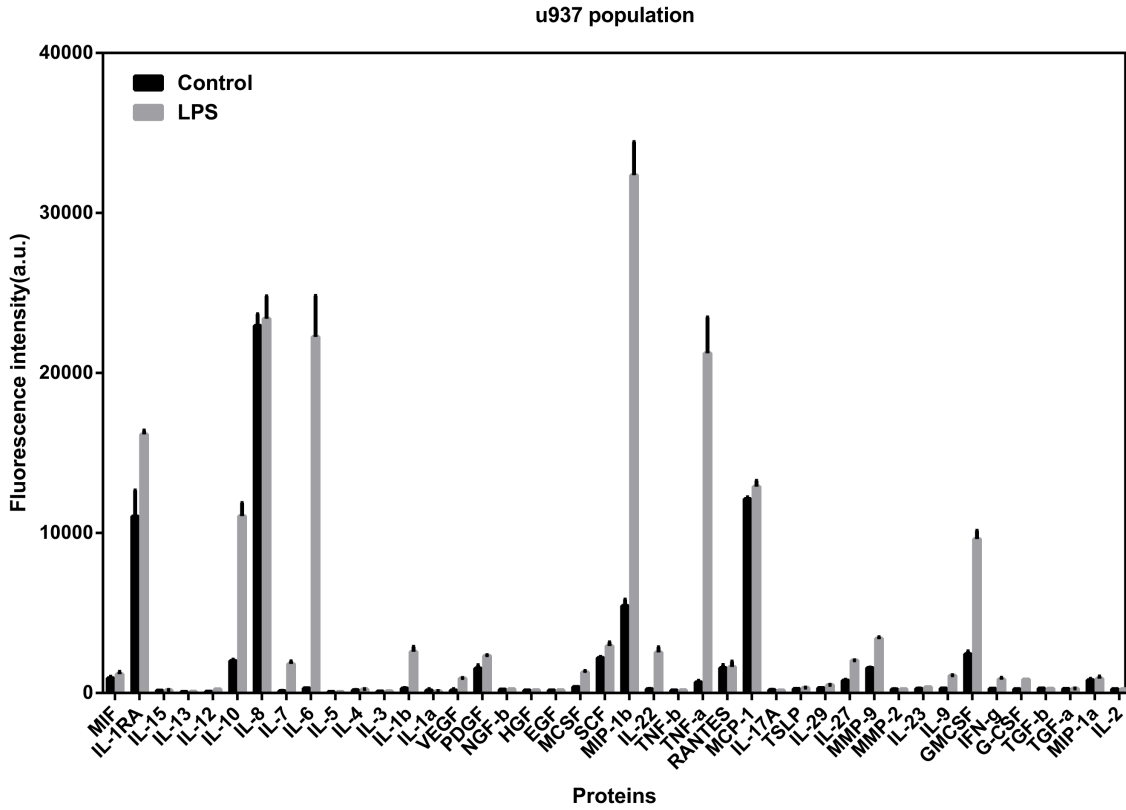

**Fig. S8 Population level protein secretion profile.** Protein secretion was measured on U937 derived macrophage cells at the population level using a conventional micro titer plate (cell density  $\sim 10^6$ /mL). Both non-stimulated and LPS stimulated cells were measured.

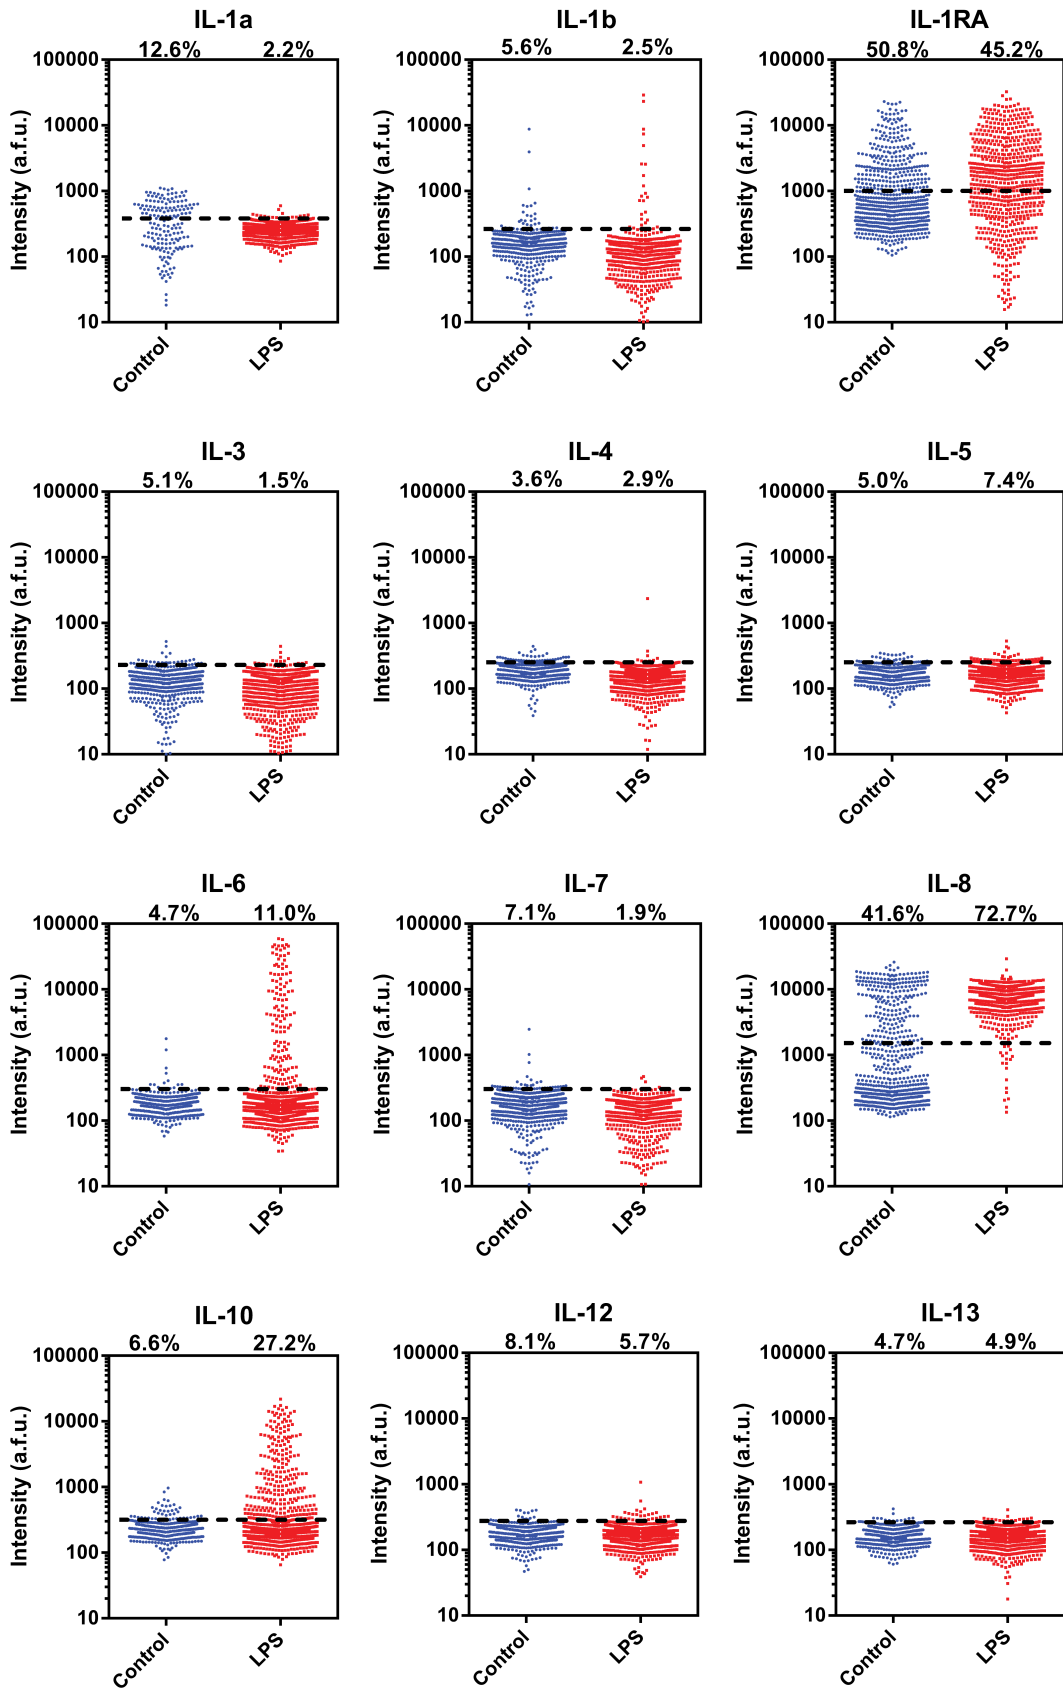

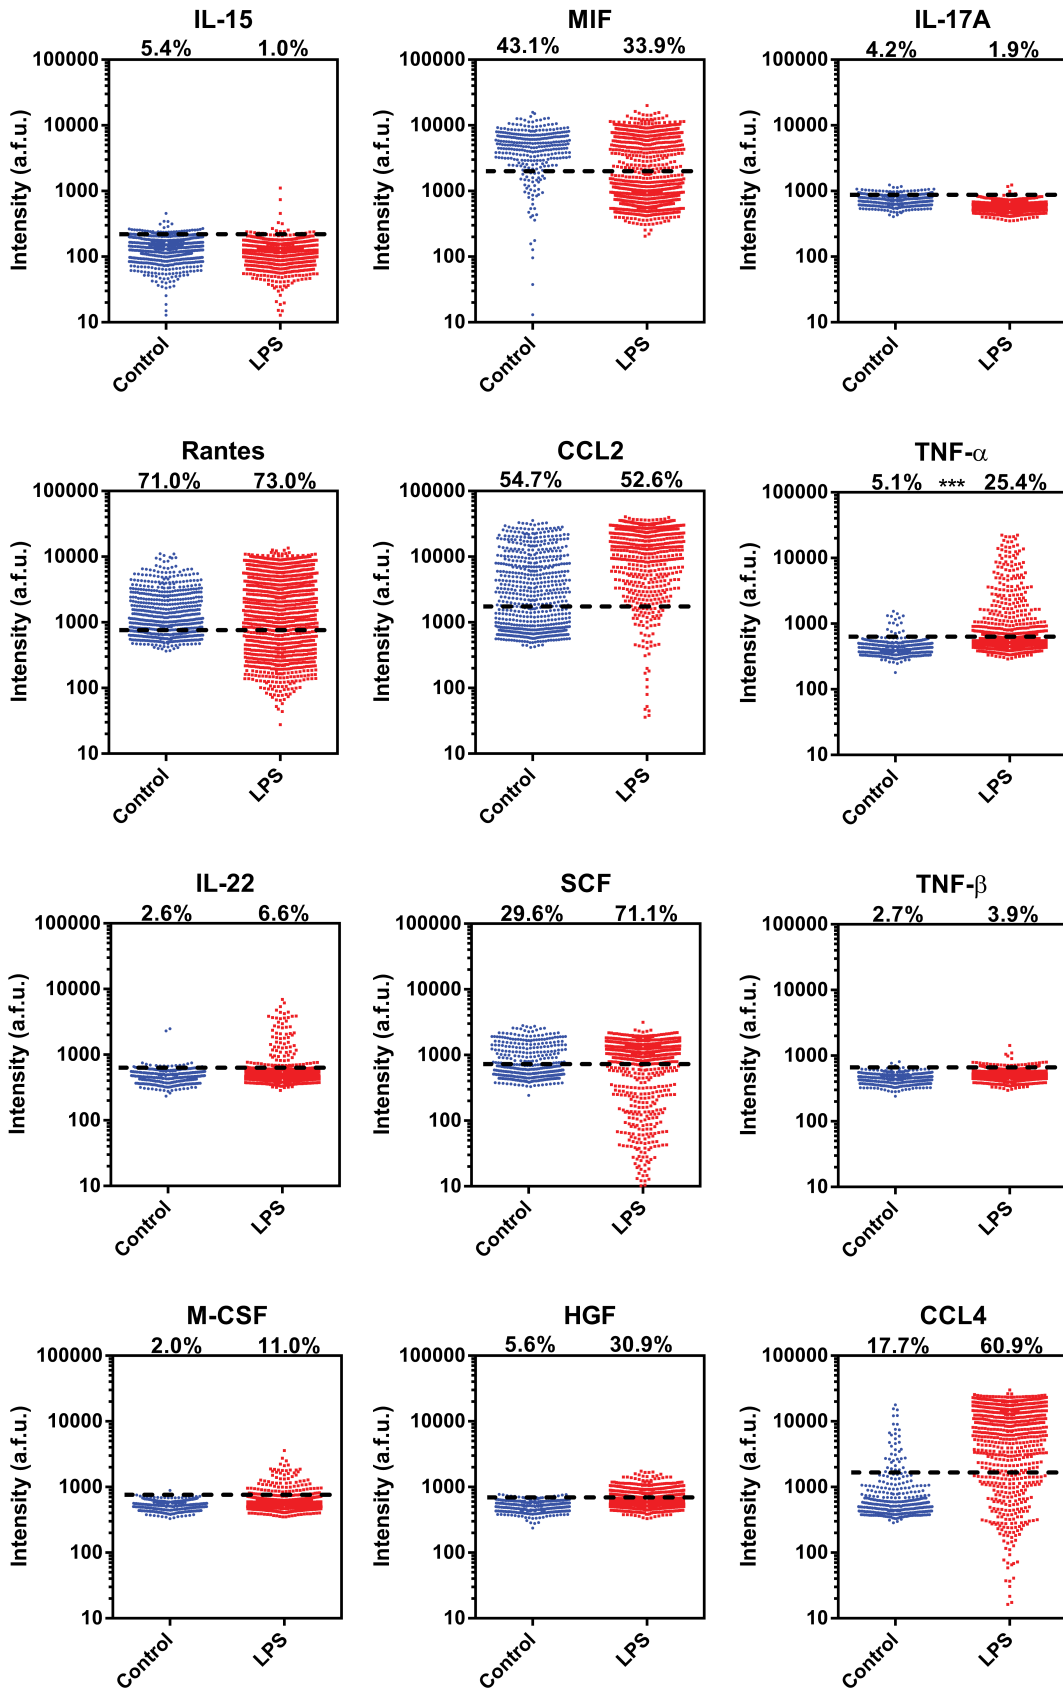



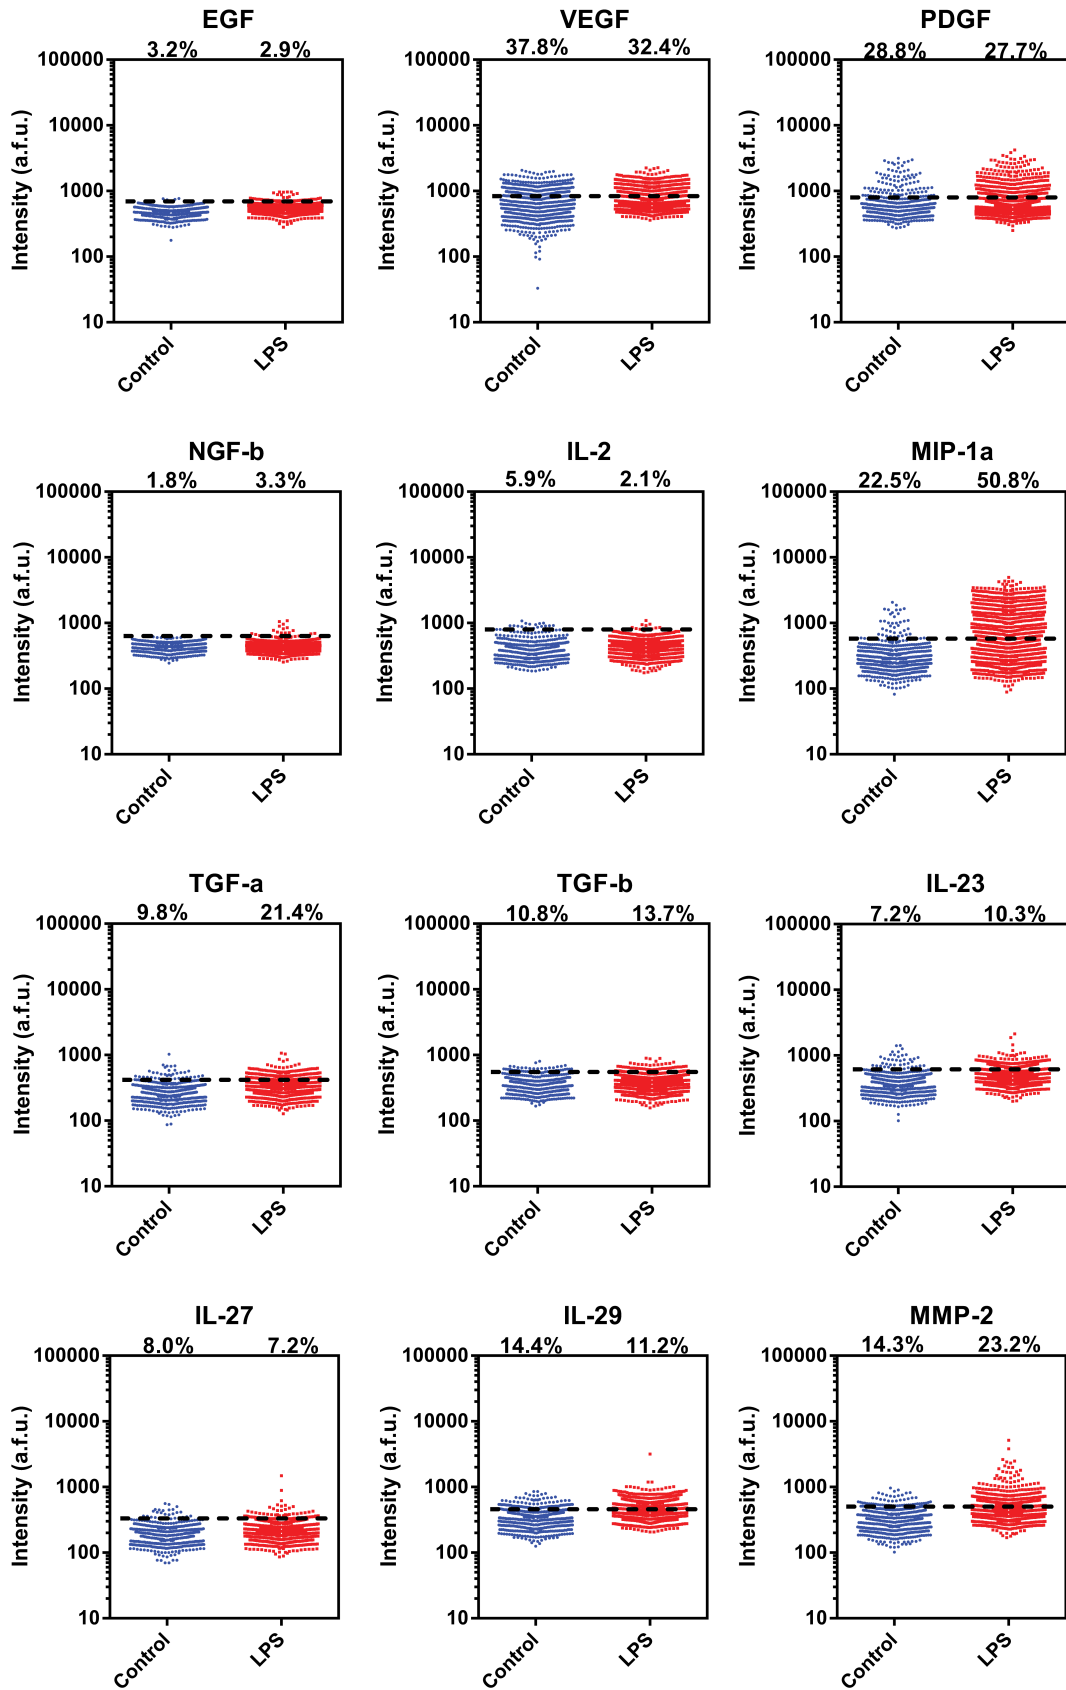

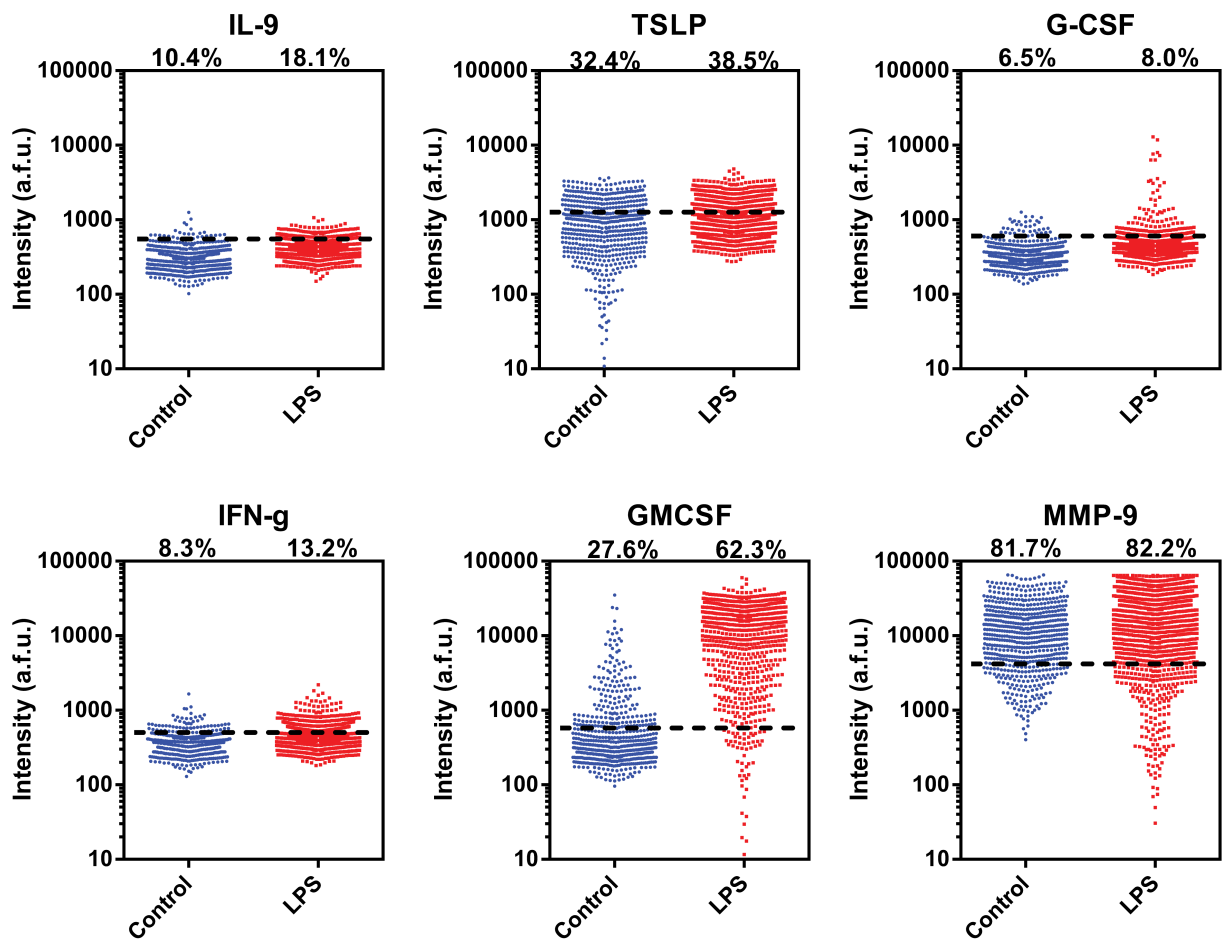

**Fig. S9 Vertical scatter plots showing cytokine secretion levels and frequency in all single cells and for all protein measured.** It includes complete single-cell cytokine vertical scatter plots showing in Fig. 2B. The plots compare single-cell protein secretion at the basal level (blue dots) and upon LPS stimulation (red dots). The dashed line marks the “gate” defined as (zero-cell data average + 2 STDV). The data were shifted vertically to match the “gates” obtained from two microchips.

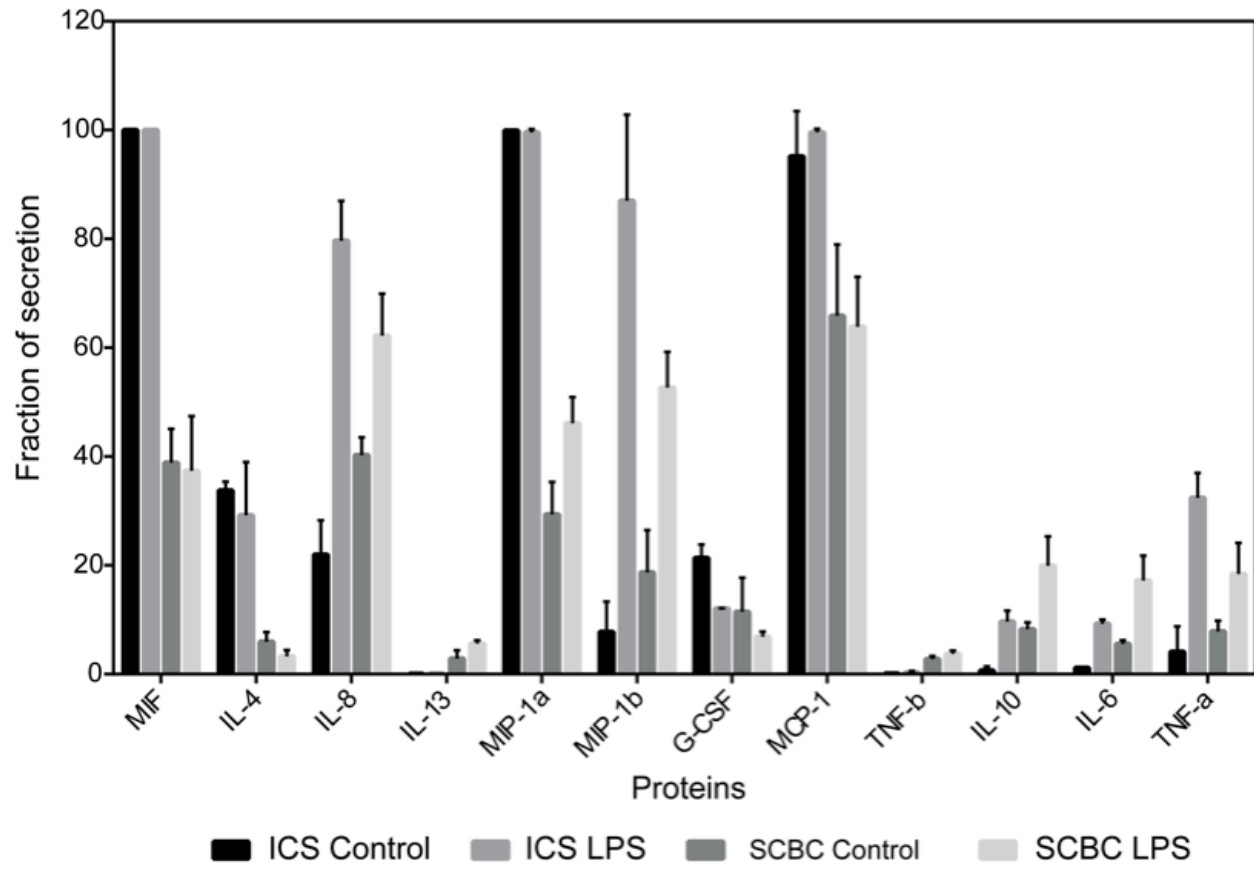

**Fig. S10 Comparison between the microchip data and the flow cytometric ICS data.** The major secreted proteins identified by single-cell microchip experiments were measured using both methods. The raw data for fraction of cytokine-secreting cells in both basal and LPS stimulated cells was compared. The correlation between ICS and our assay is moderate due to several reasons. (1) The microchip assay measures the amount of protein secreted by a cell, whereas ICS measures the protein synthesized but trapped inside a cell, representing a different biological process. (2) We used a sandwich immunoassay, which requires two different epitopes of a protein being recognized to give rise to a positive signal and thus provides higher or more stringent specificity than intracellular staining. (3) Our microchip assay eliminates paracrine-induced amplification of protein secretion all the way in the beginning, which is different from the standard ICS assay. Thus, detection threshold for a protein secreting cell differs substantially using these two methods. However, we observed that the response to LPS stimulation measured by the increase in the fraction of cells secreting a given cytokine exhibits good correlation between the two methods (Fig. 2d).

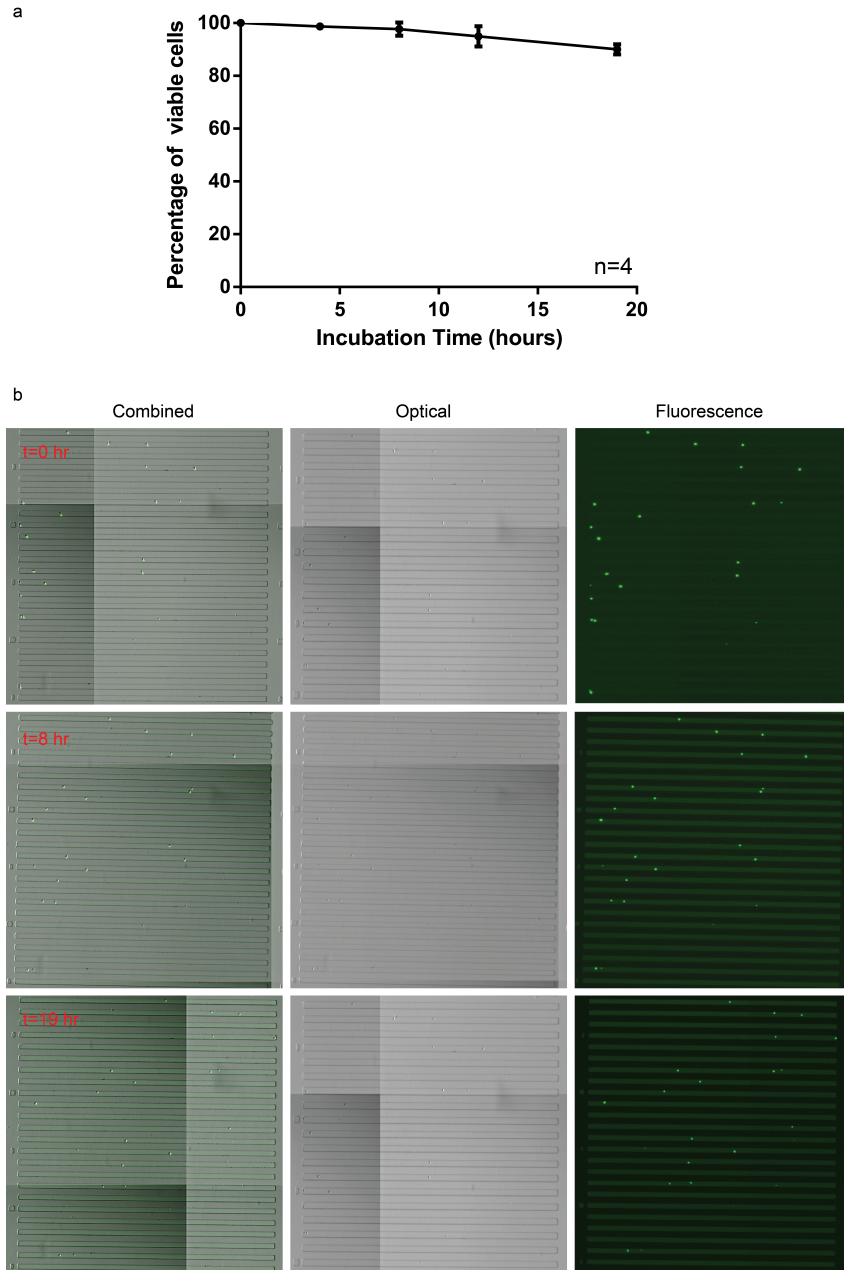

**Fig. S11 Cell viability assay.** The cells were stained with Calcein AM (Life technologies, USA) before loading into PDMS microwells. Then they were imaged at 0, 4, 8, 12 and 19hr. One column was randomly chosen and quantified (220 microchannels, around 350 cells in total). The cells showing positive green fluorescence signal were scored as viable. The result showed that 90% of the cells were still alive after 19 hr incubation.. Considering the dye may be toxic to cells and cells were imaged at non-tissue culture environment for 1 hr in each imaging (5 hr in total), the cell viability is estimated higher than 90%.

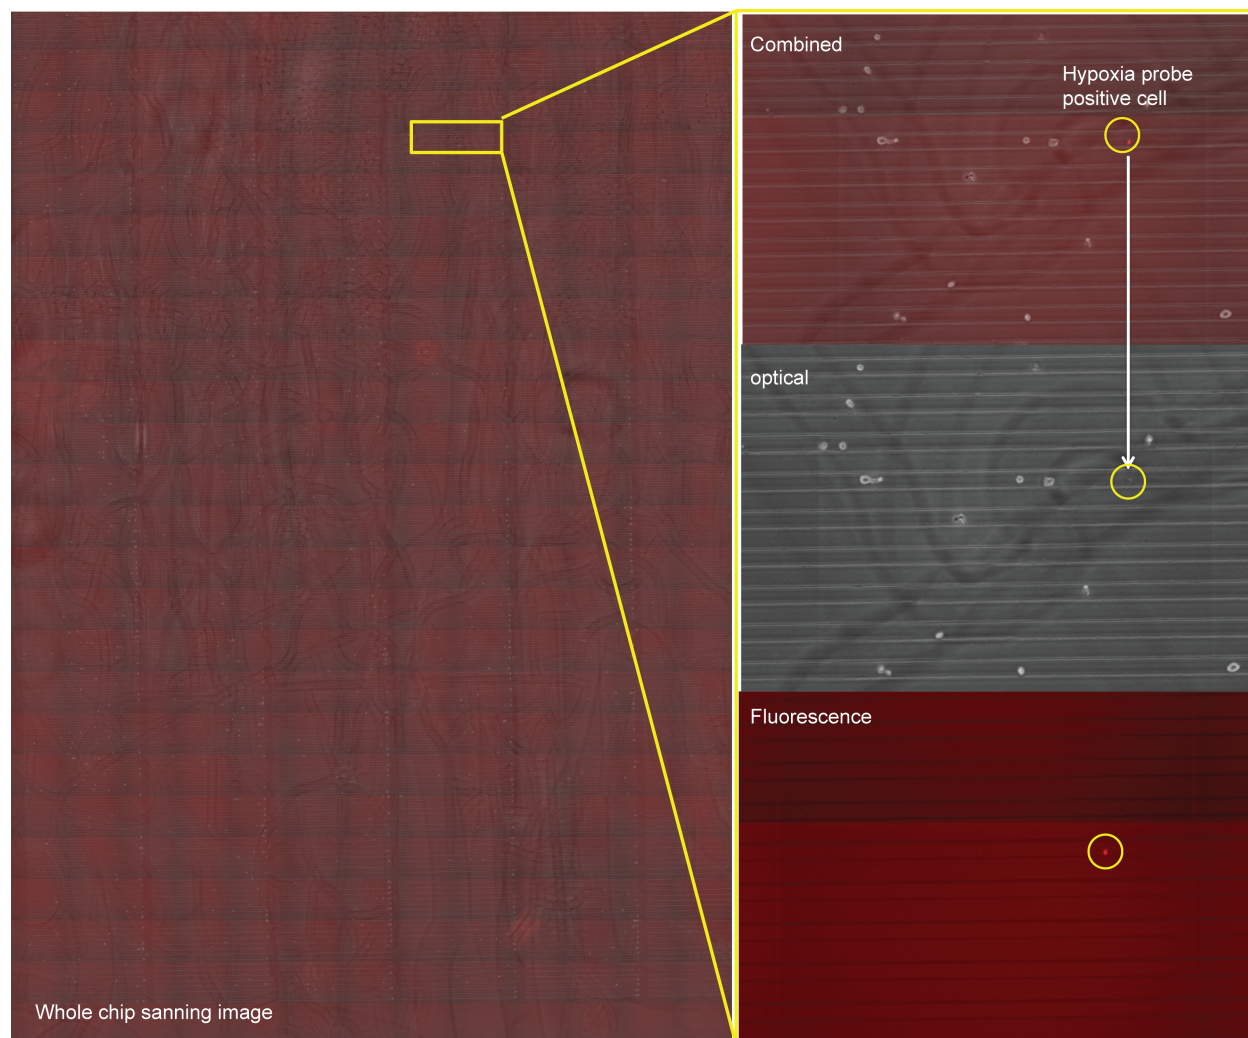

**Fig. S12 Cell hypoxia assay.** Hypoxia test of U937 macrophage cells after 24 hr incubation in enclosed PDMS microwells with hypoxia fluorescence probe LOX-1 (SCIVAX, USA). The results showed that less than 1 % (2 cells positive out of 351 cells) of cells enclosed showed positive with hypoxia fluorescence dye, which indicates excellent oxygen permeability of PDMS can ensure cells be cultured in normoxia condition all through single cell experiment.

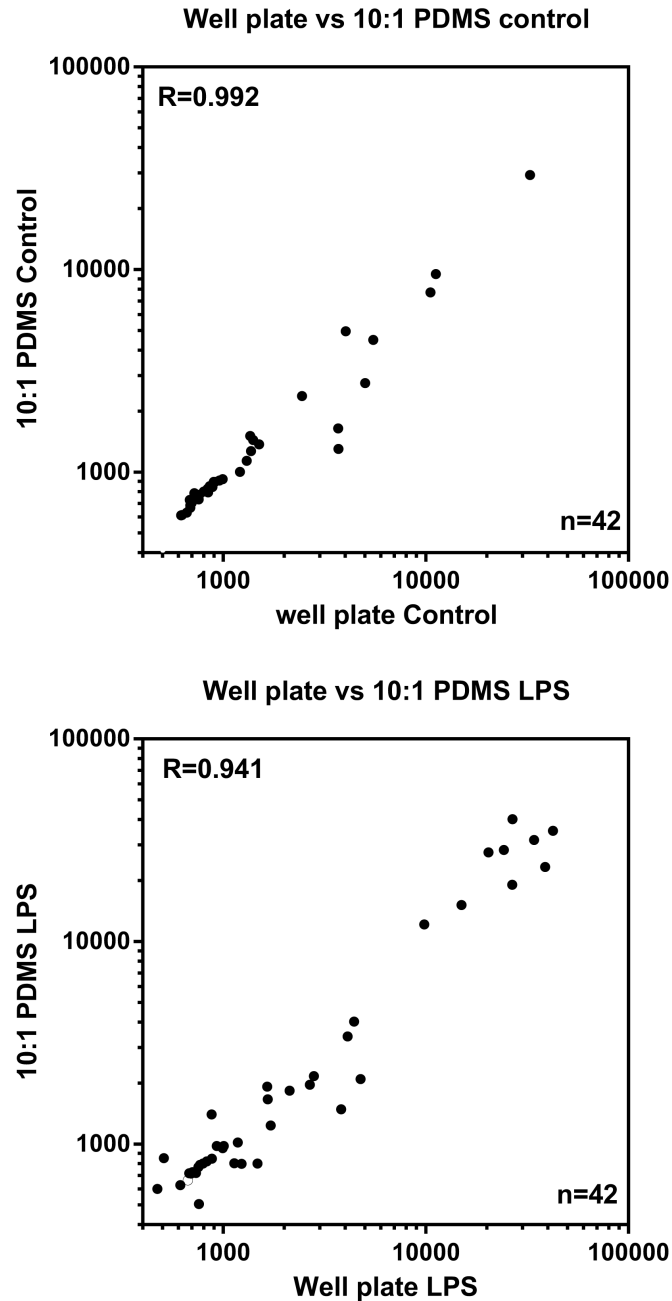

**Fig. S13 Effect of substrate mechanical property on protein secretion.** Comparison of U937 populational protein secretion profiles cultured on the polystyrene surface in a 96 well plate vs. a standard PDMS elastomer surface (prepolymer:initiator = 10:1). PDMS is nontoxic, biocompatible, transparent elastomer and has been widely used in biological and biomedical research. Polystyrene is a routine material used in conventional well pate experiment. The results indicate the U937 macrophage cells exhibited very similar protein secretion patterns and intensity on both substrates. The protein secretion profiles measured in cells cultured on two different substrates showed highly correlated with each other ( $R>0.99$  and  $0.94$  in basal and LPS stimulated protein secretion tests, respectively).

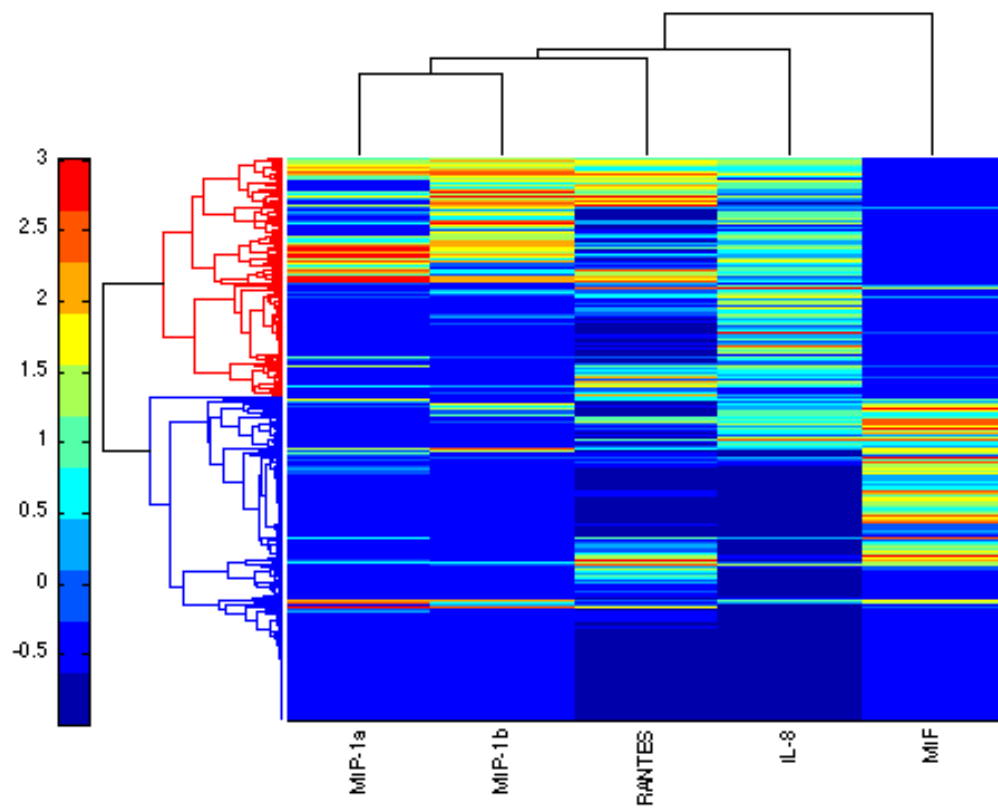

**Fig. S14. Heatmap showing MIF-secreting population is largely anti-correlated with proinflammatory cytokine-secreting populations.** The plot is from the data shown in Figure 2a and apparently MIF is anti-correlated with LPS activation.

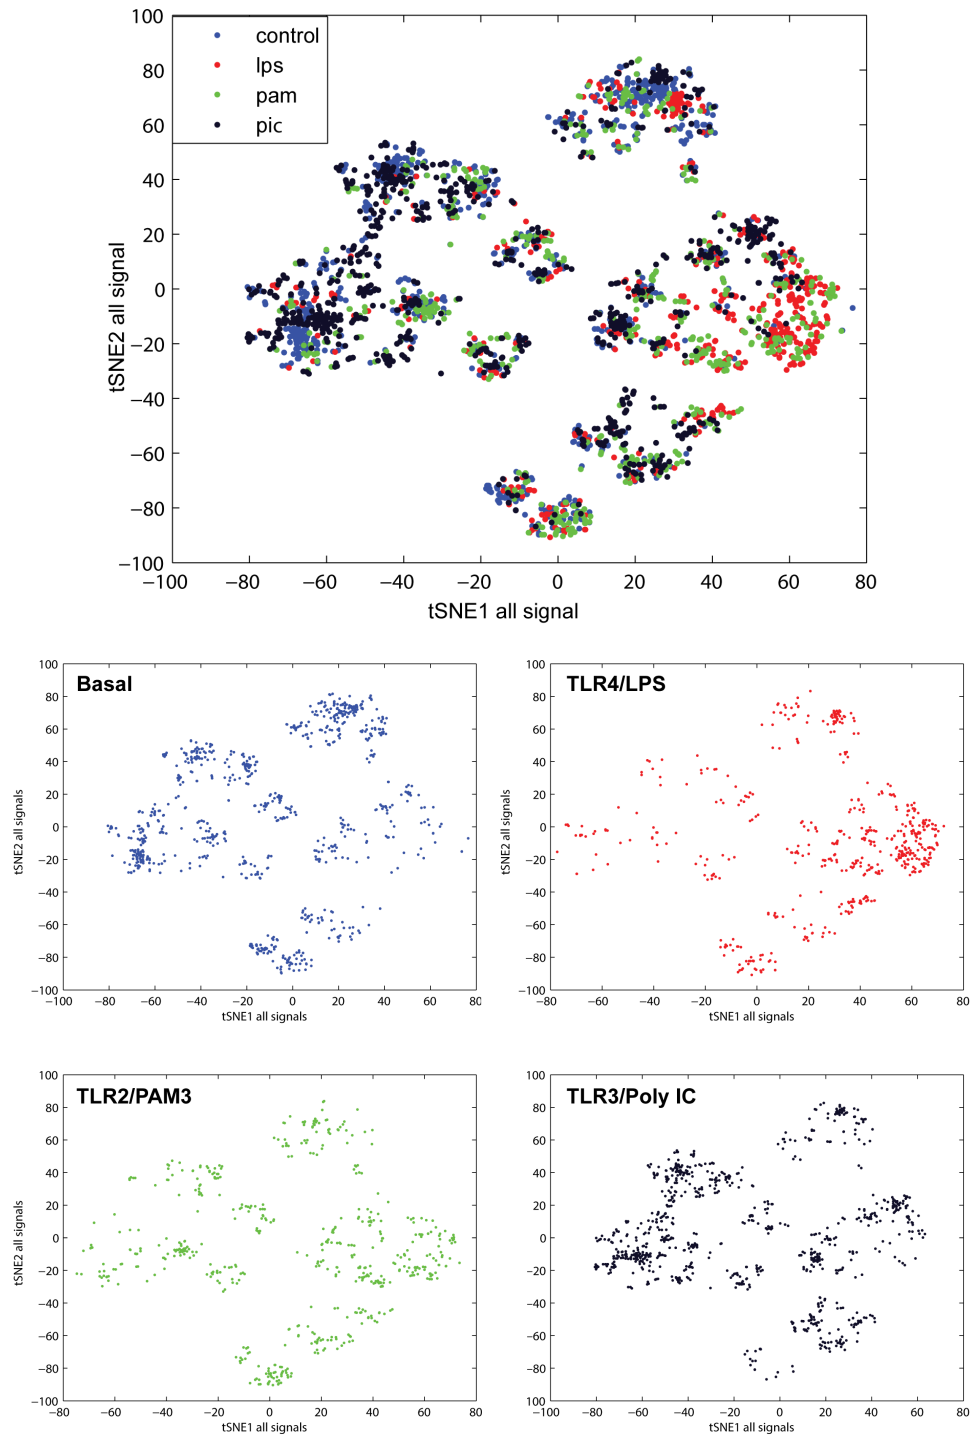

**Fig. S15. viSNE maps showing the high-dimensional clustering of single cells (U937-derived macrophages) at the basal level and stimulated with different TLR ligands.** It shows viSNE structure maps for U937 derived macrophage cells at the basal state and under the stimulation of different TLR ligands(basal, TLR4 by LPS, TLR1/2 by PAM3, TLR3 by poly IC).



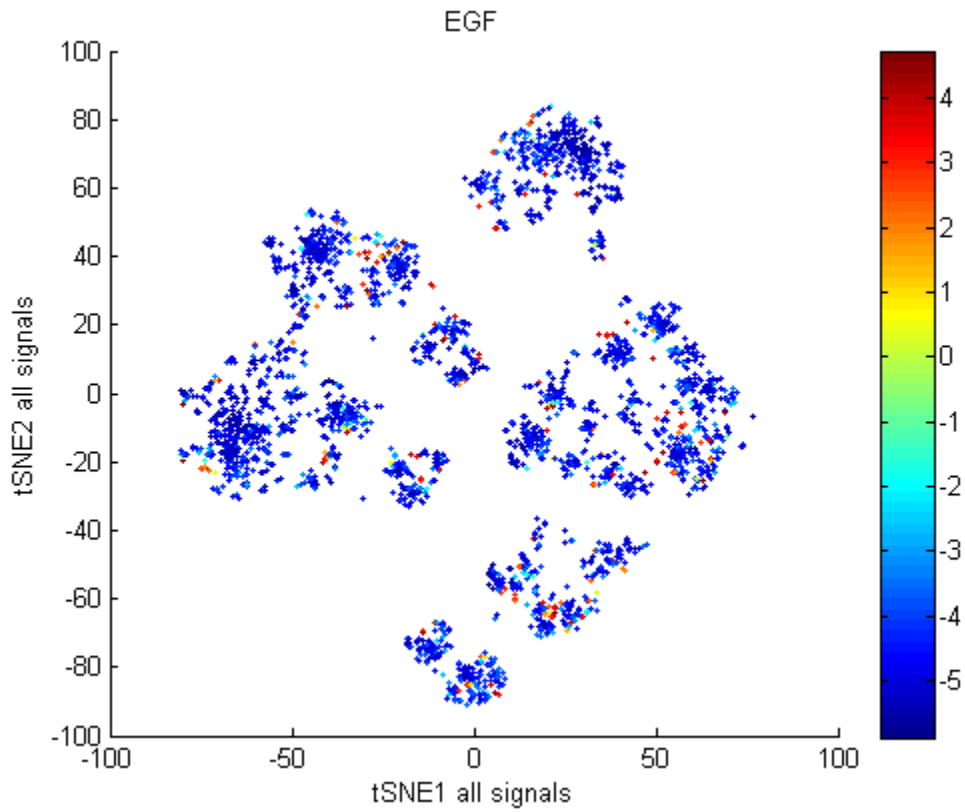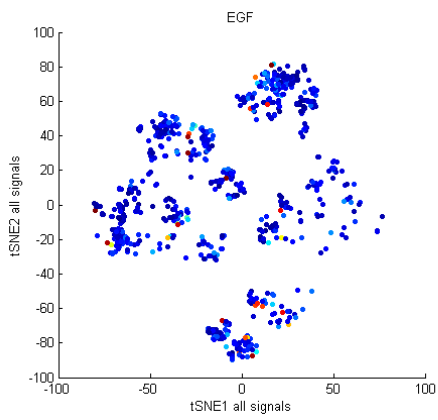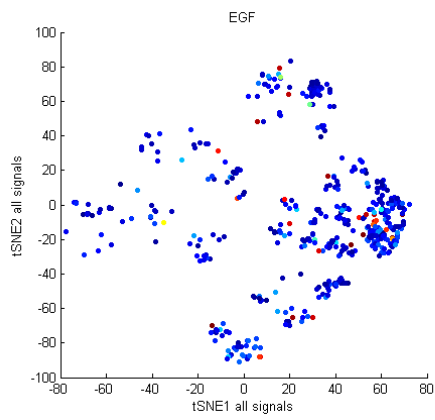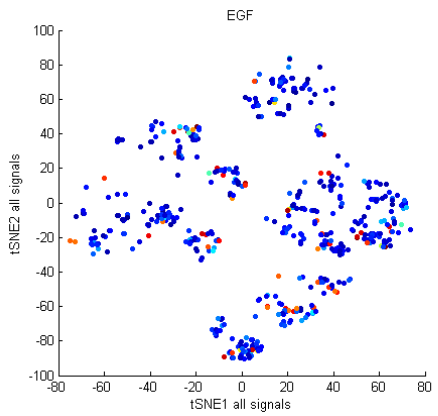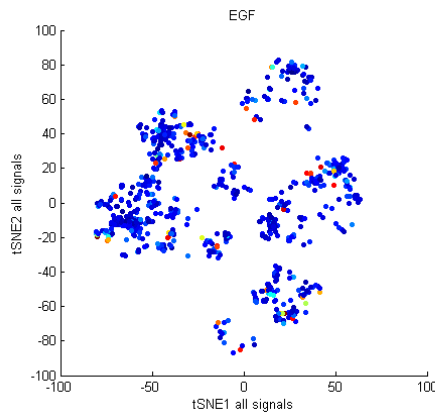

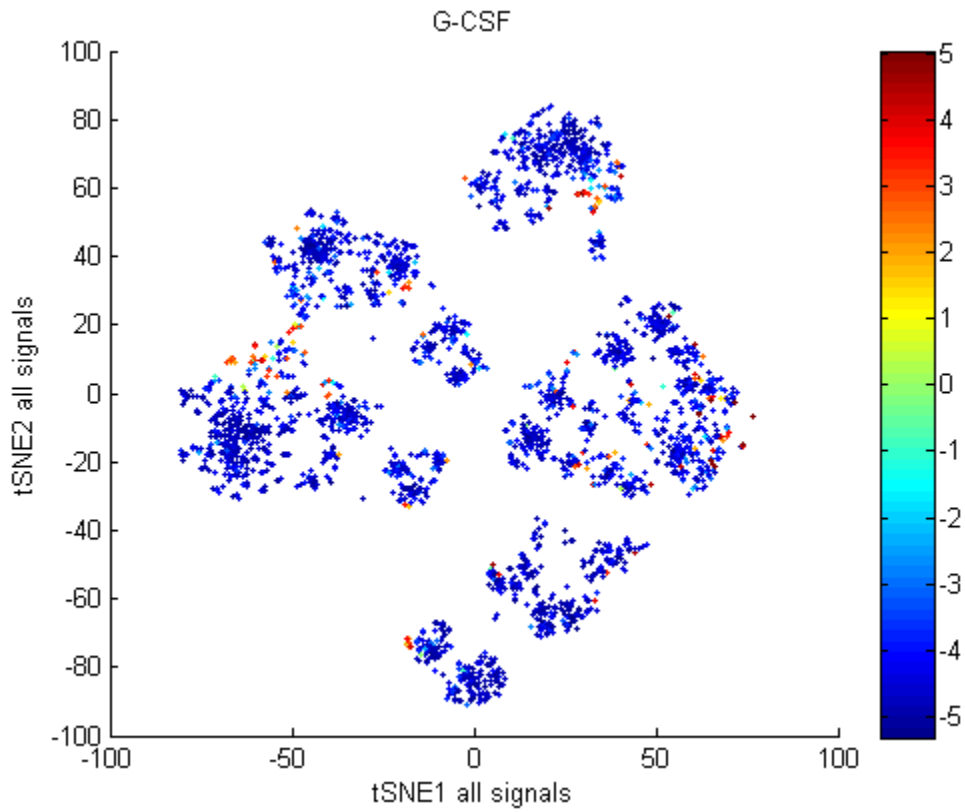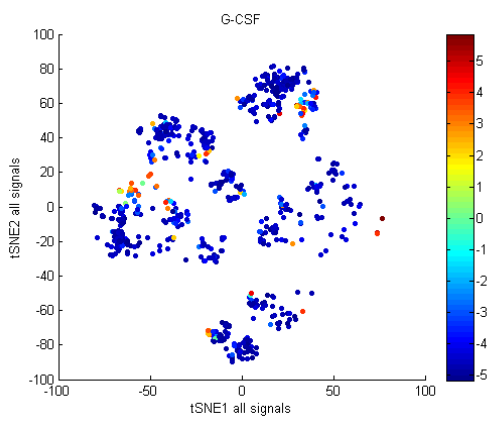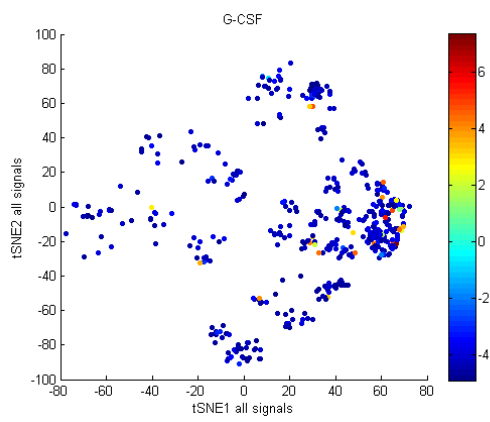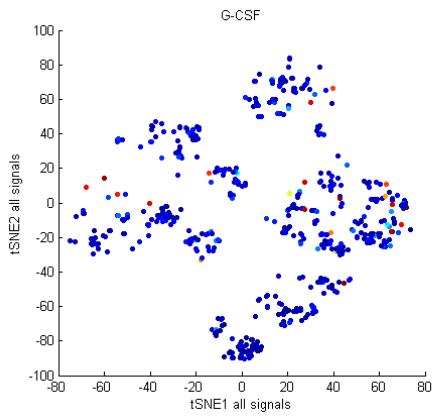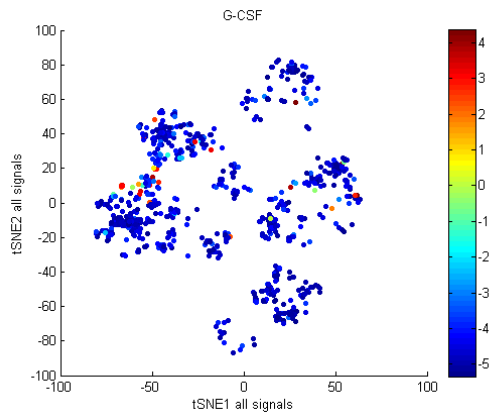

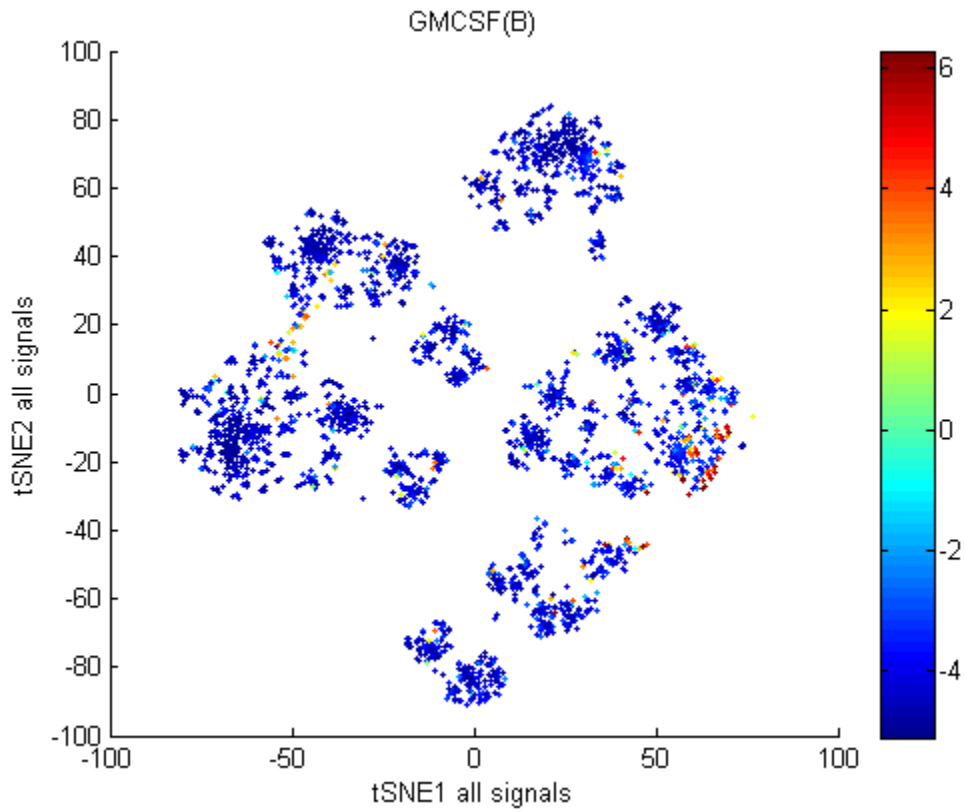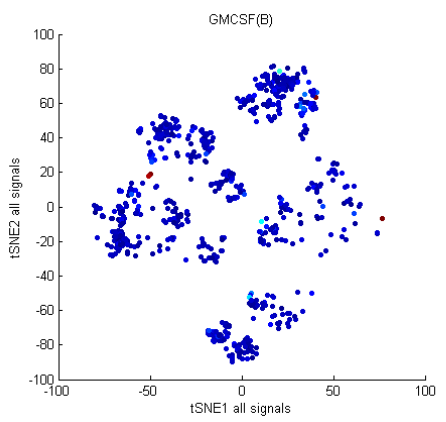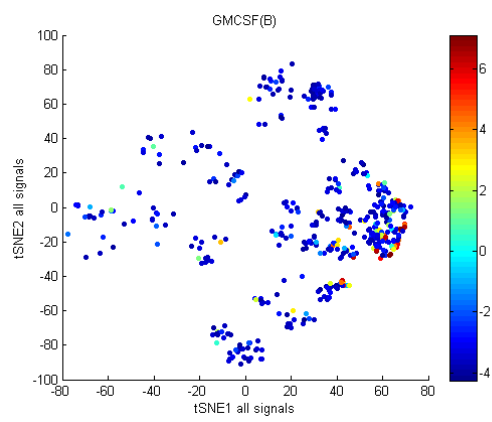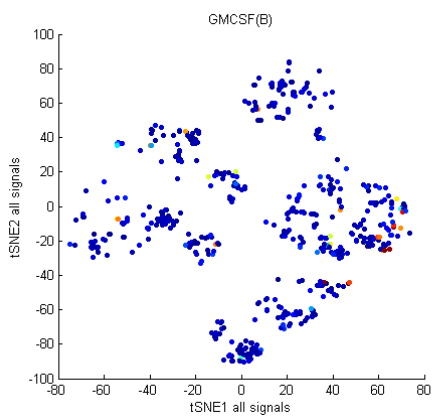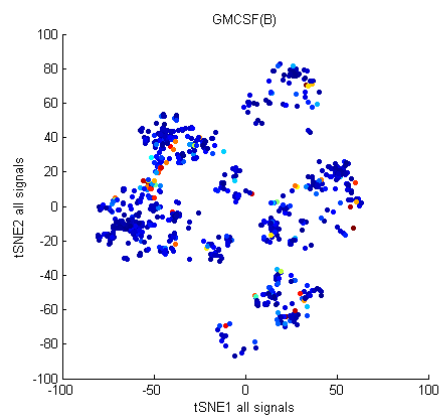

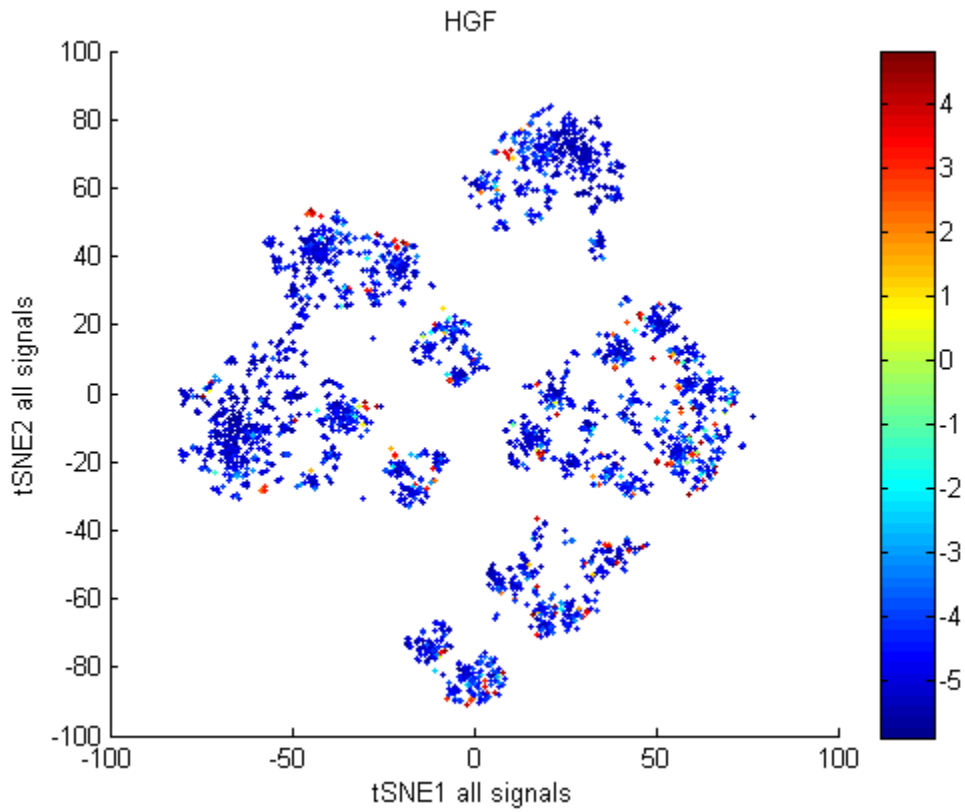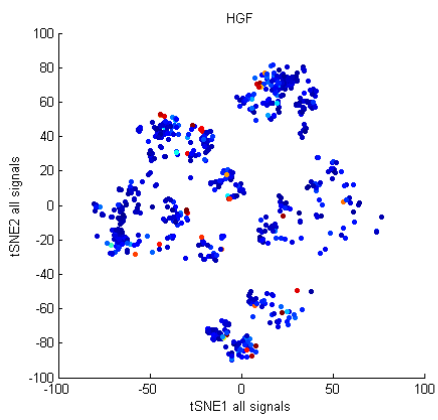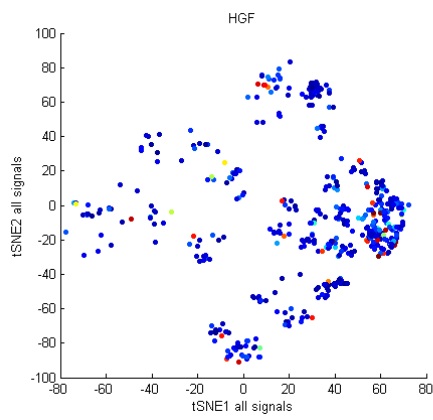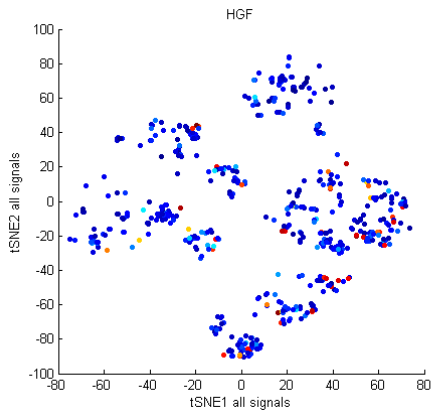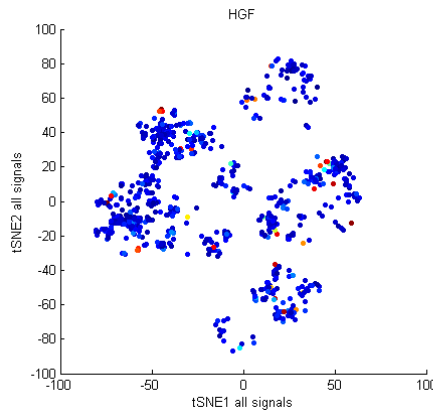

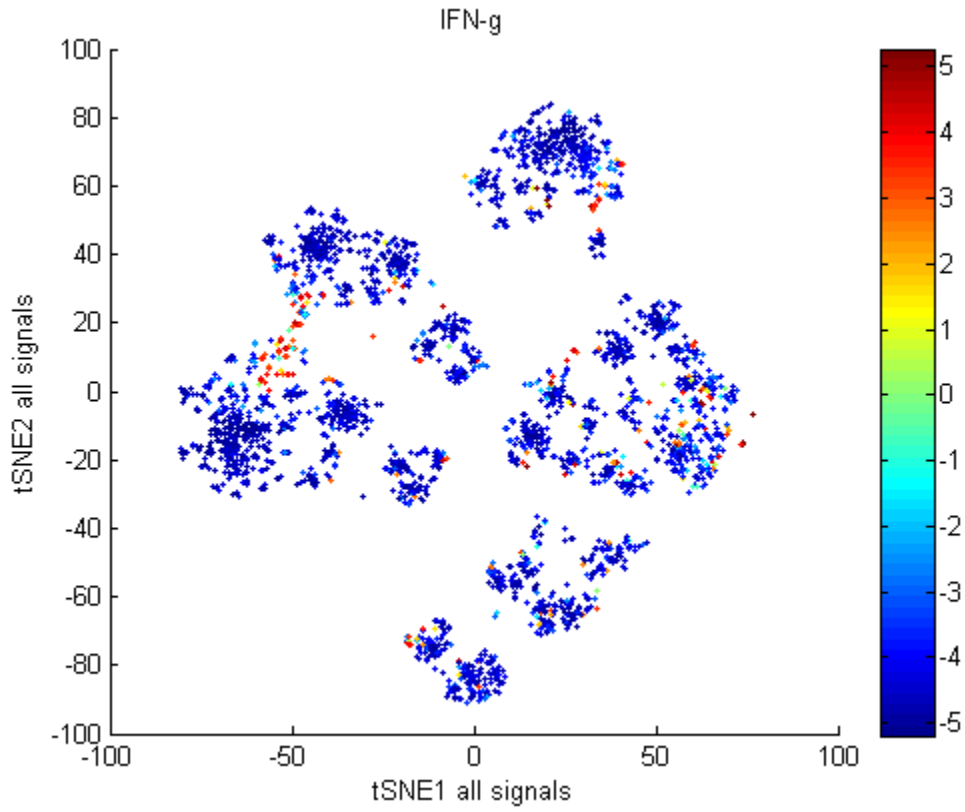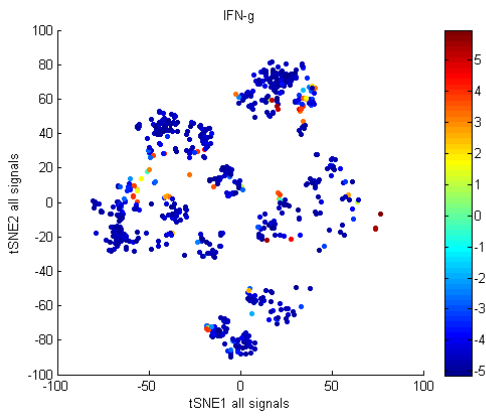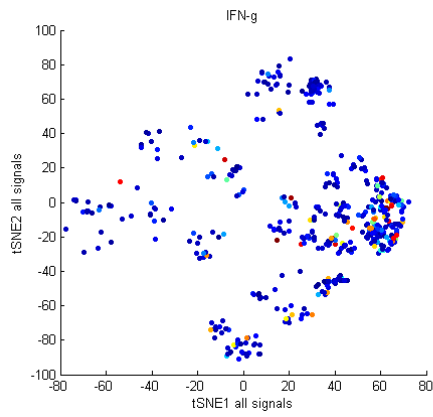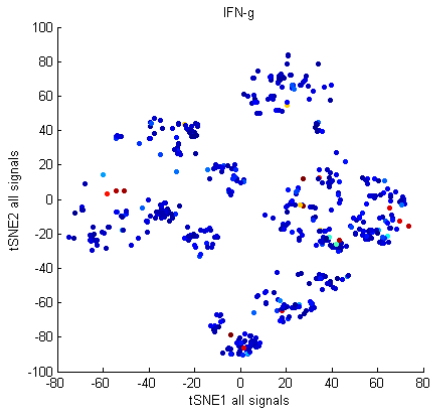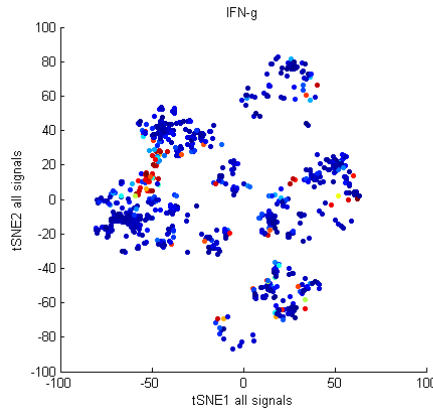

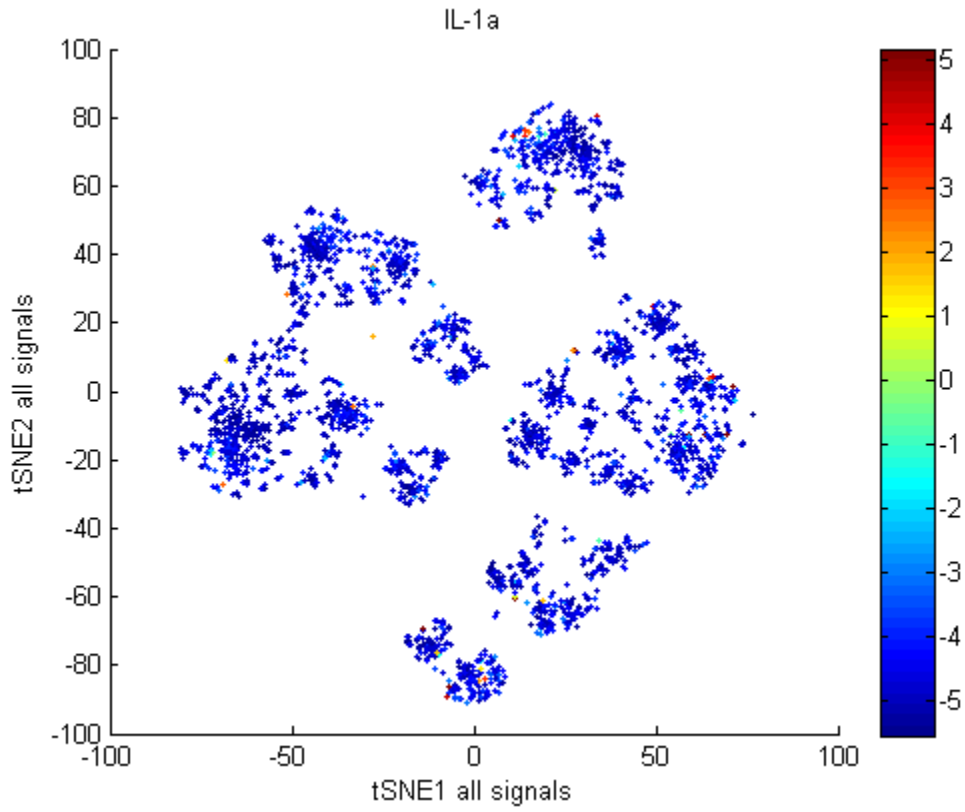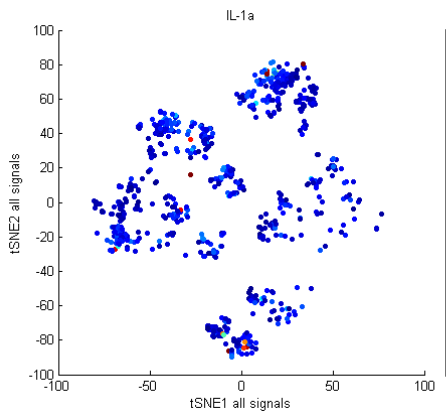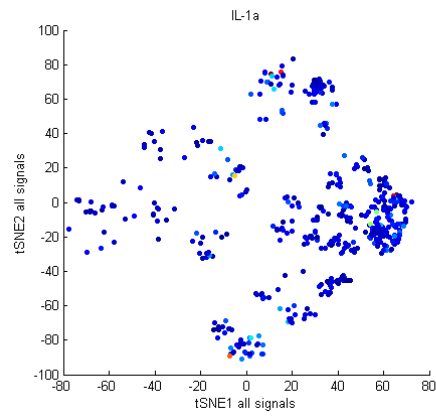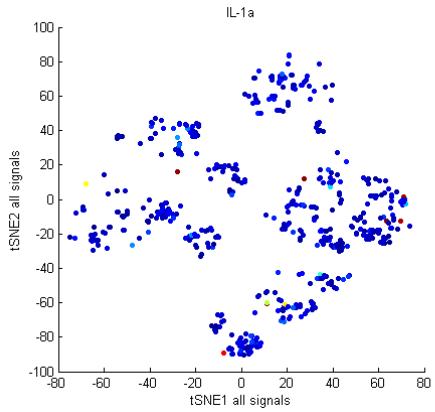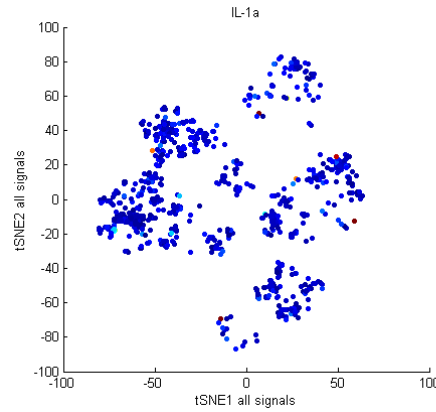

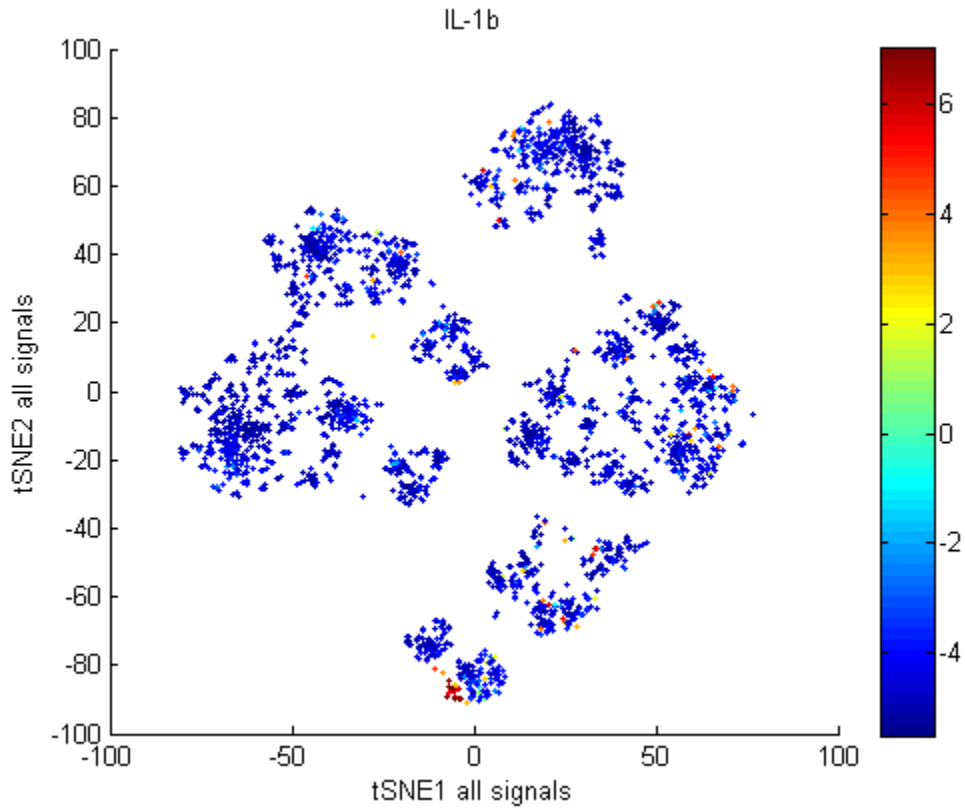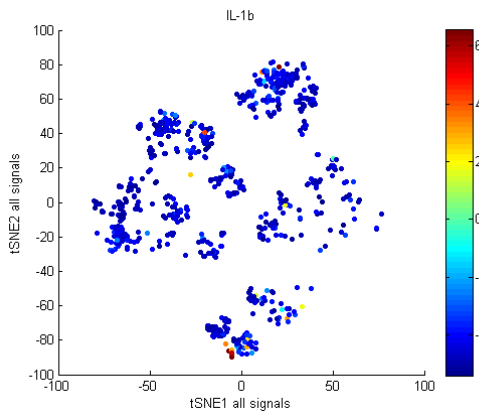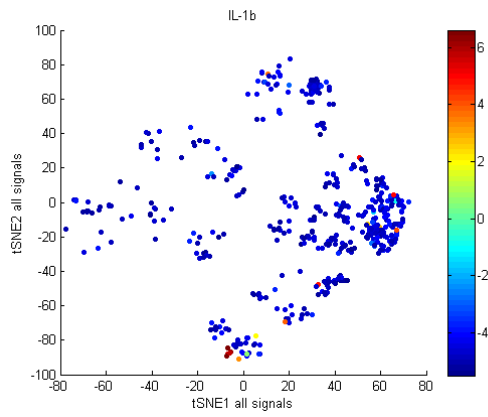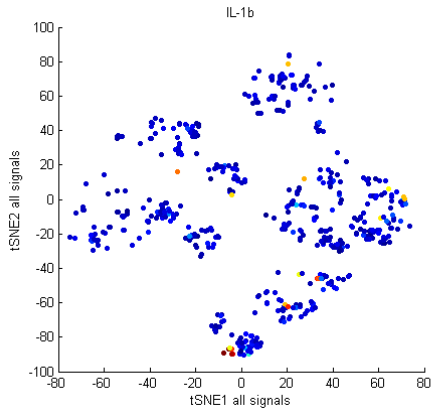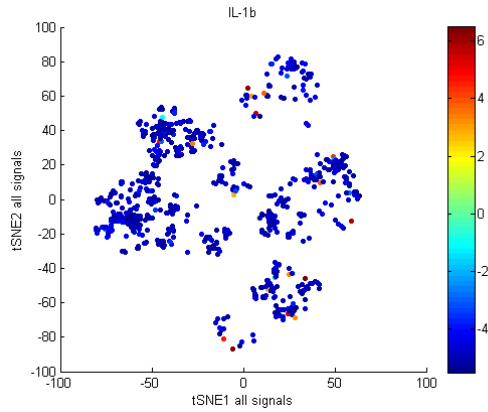

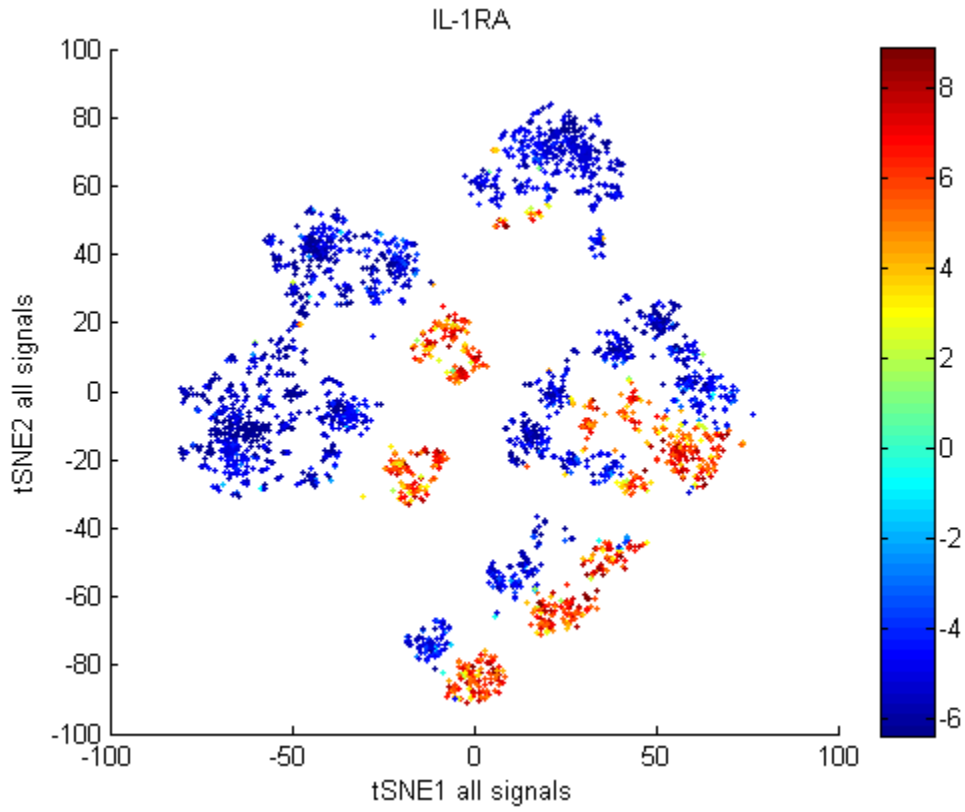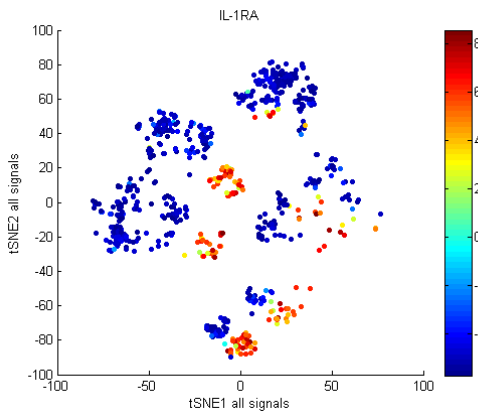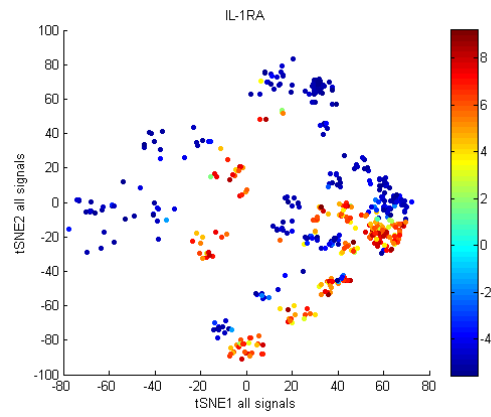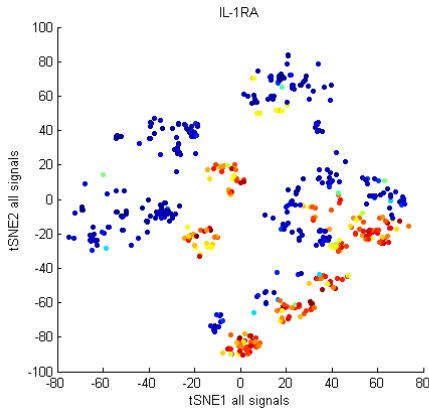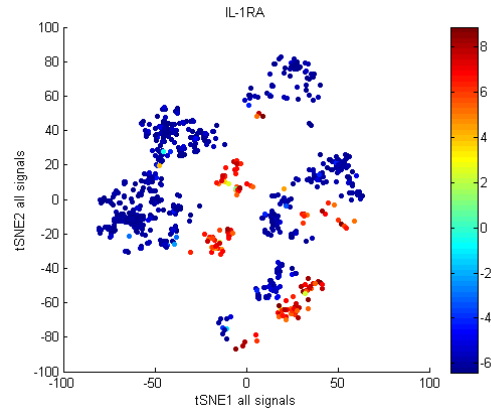



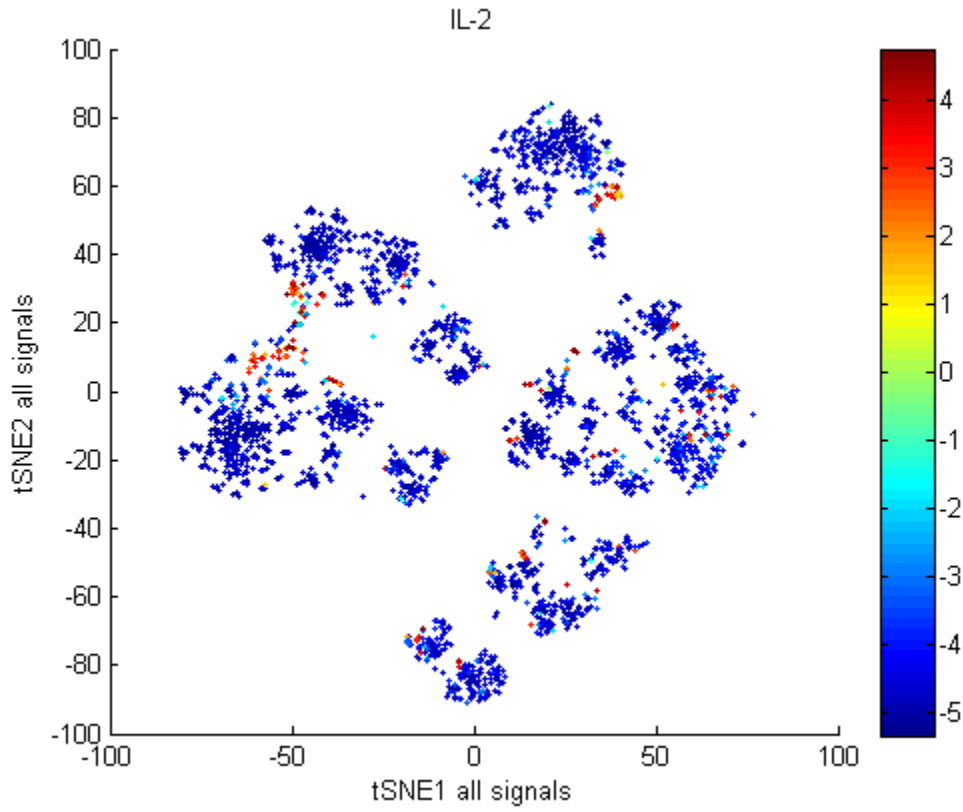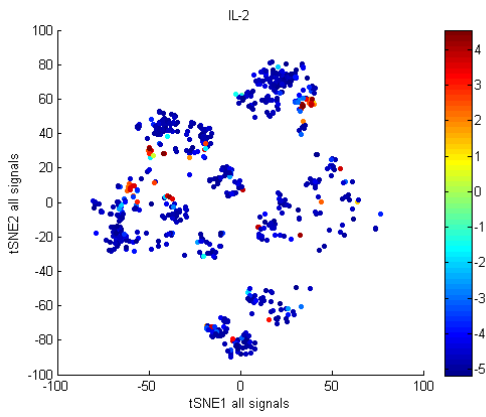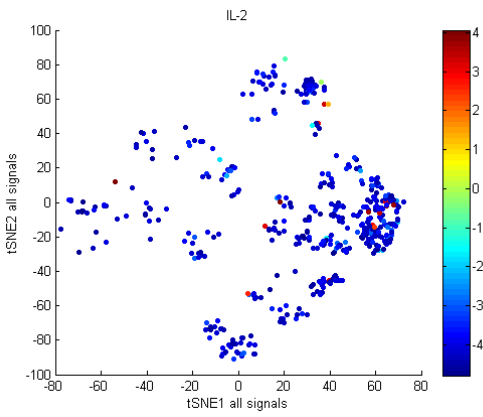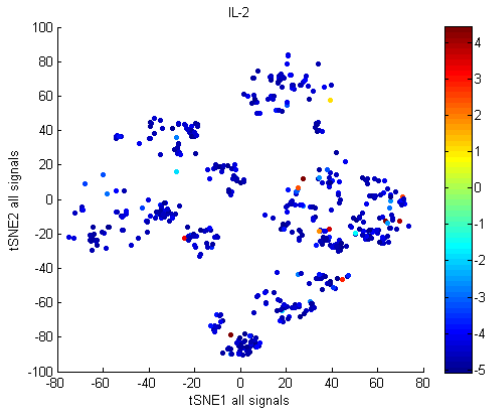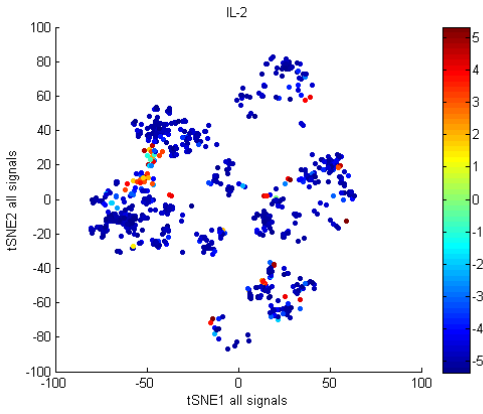

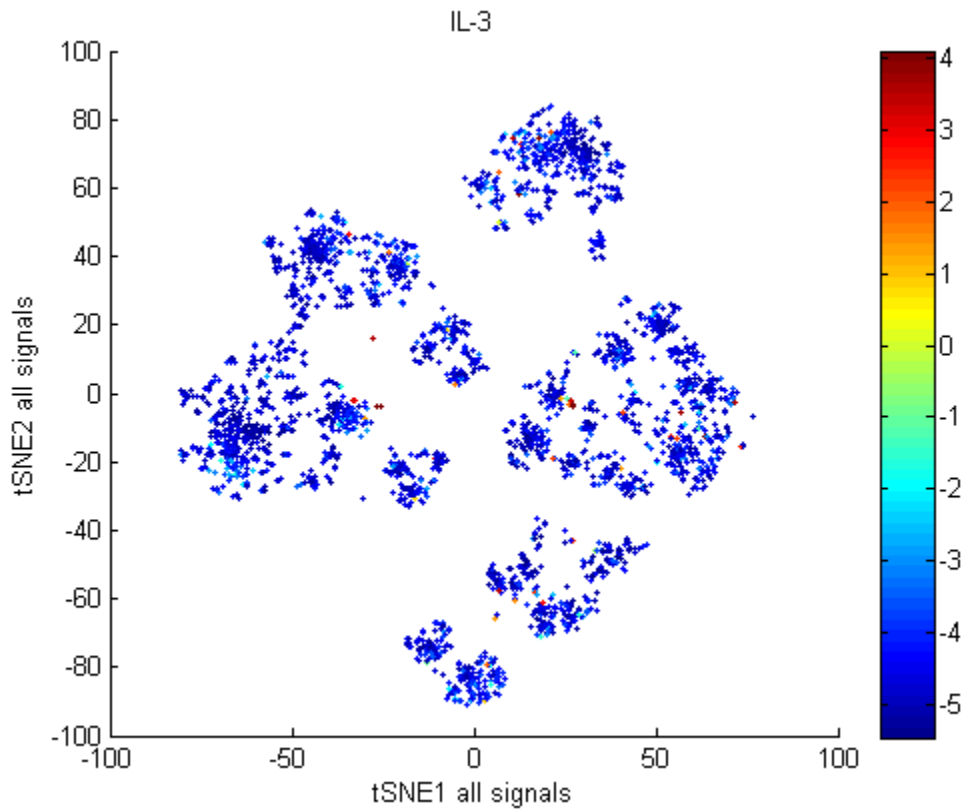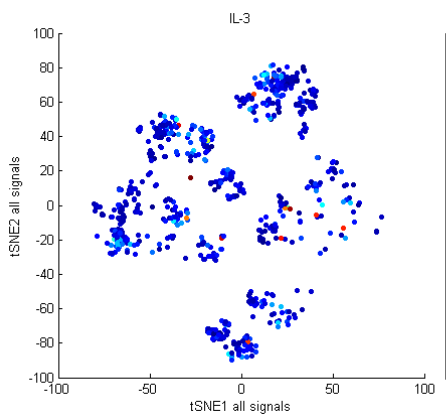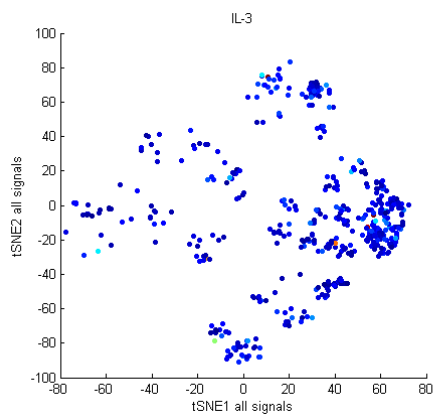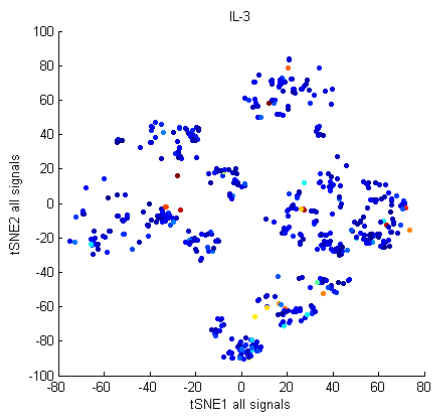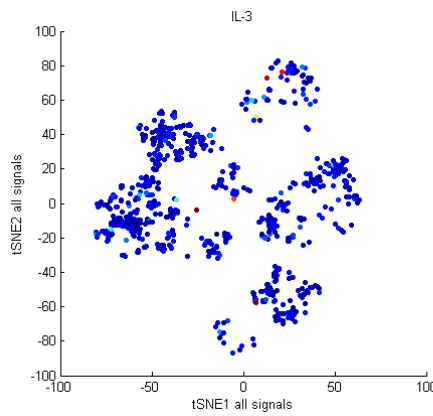

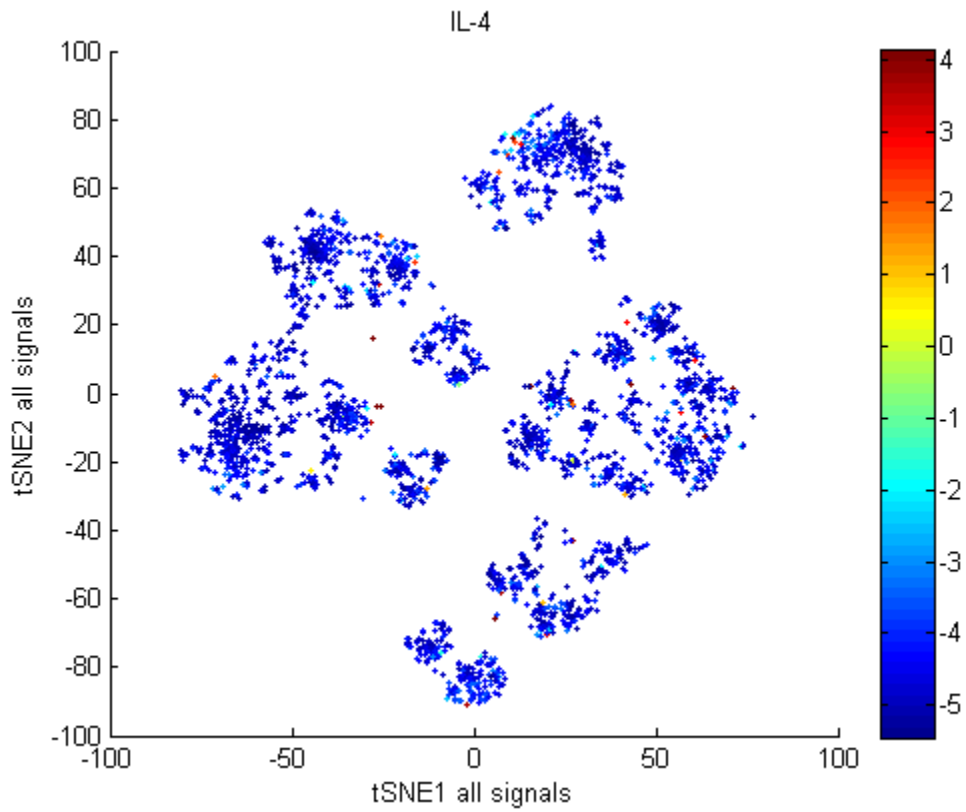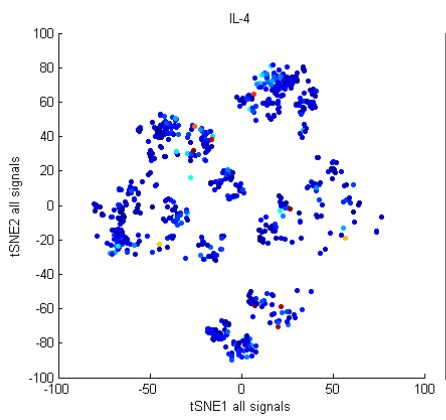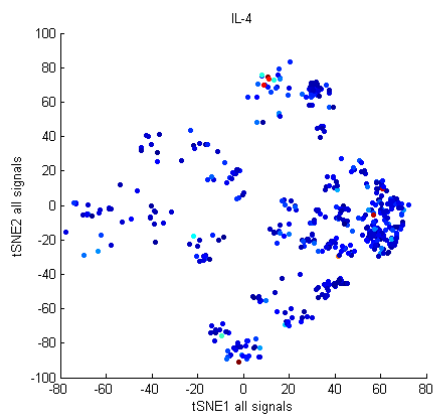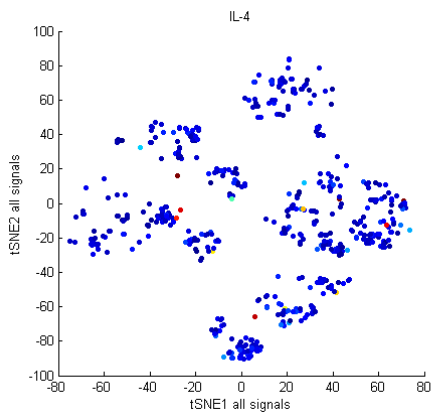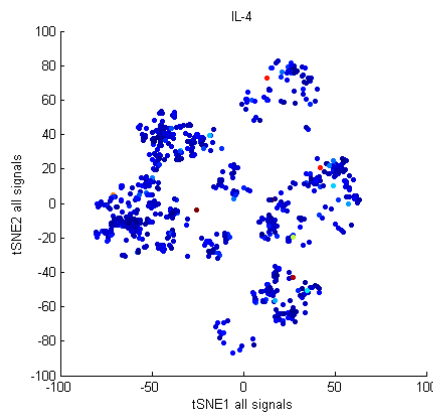

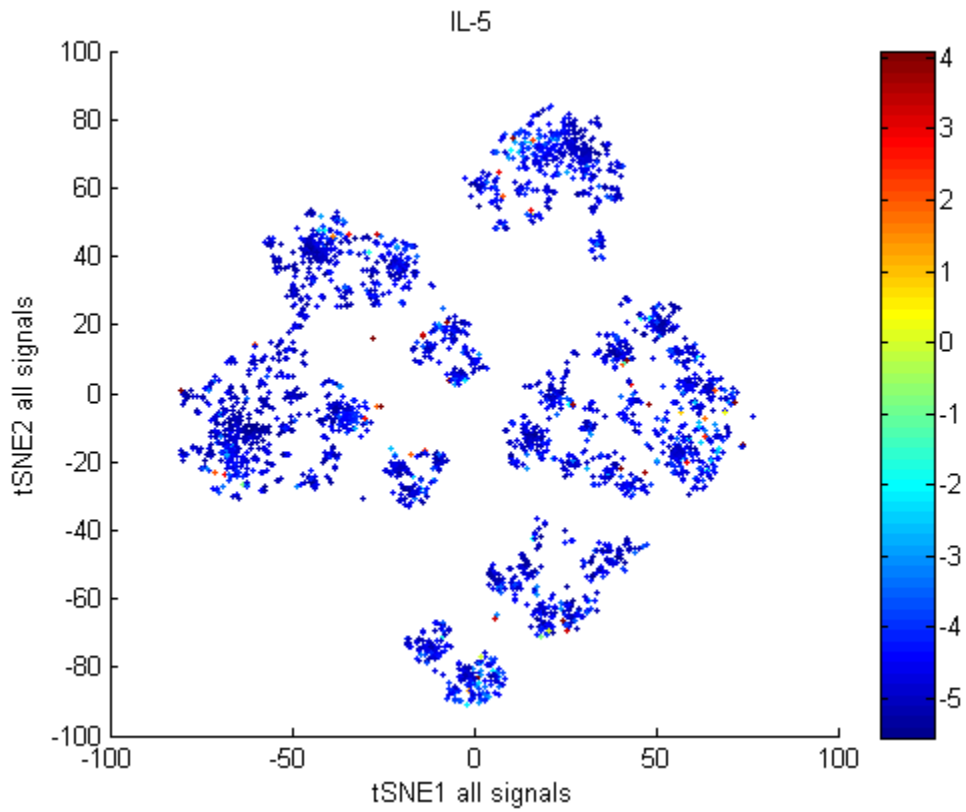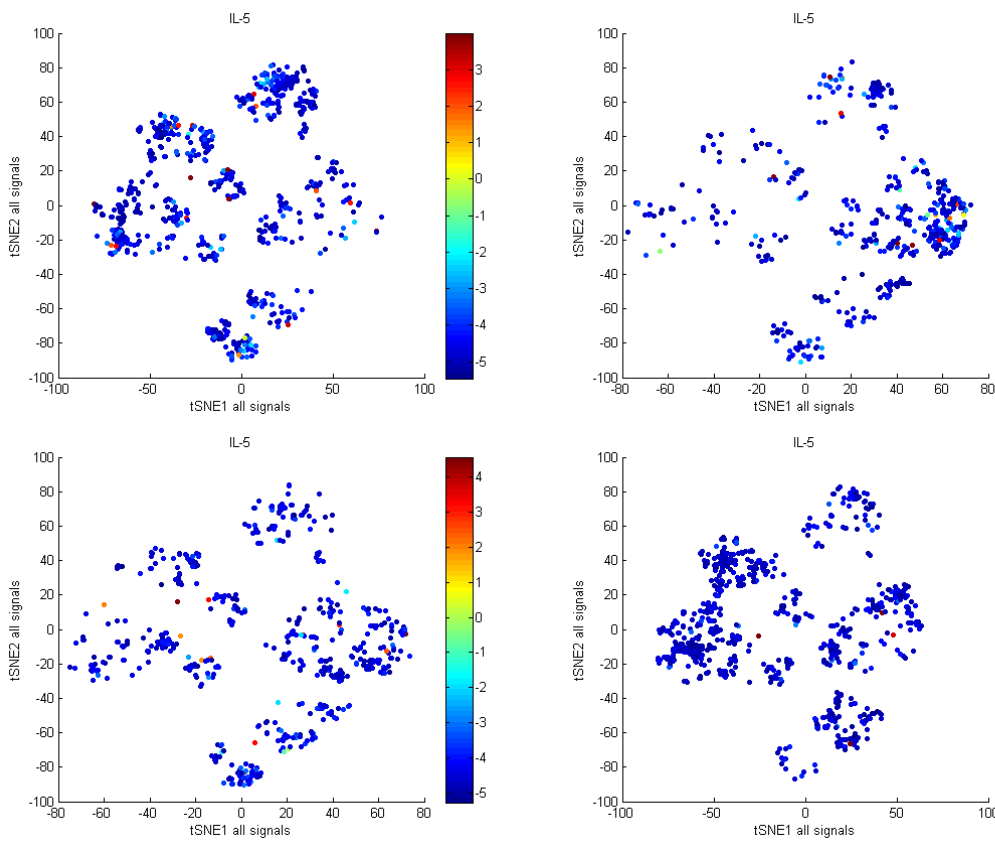

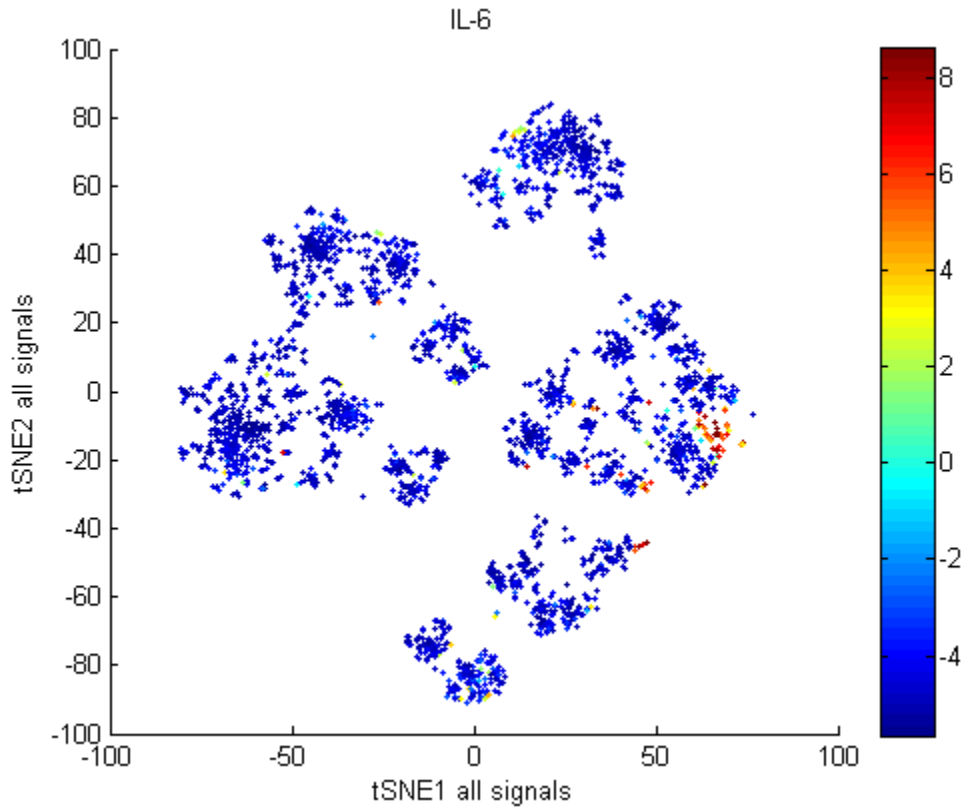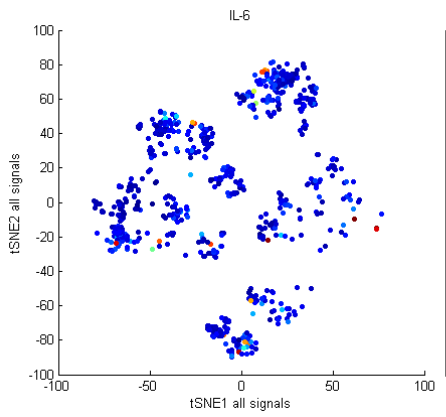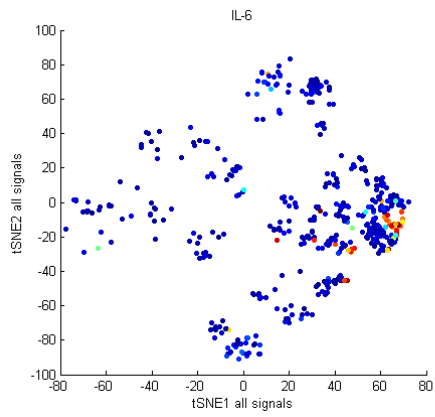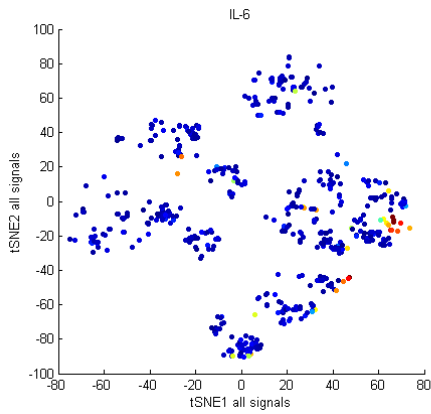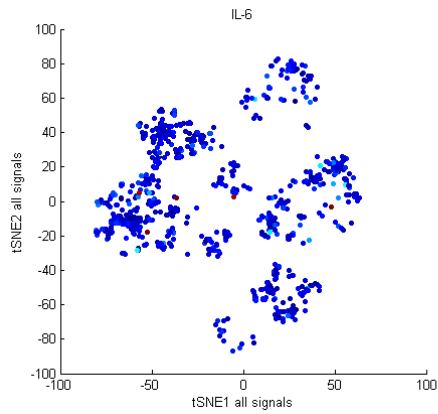

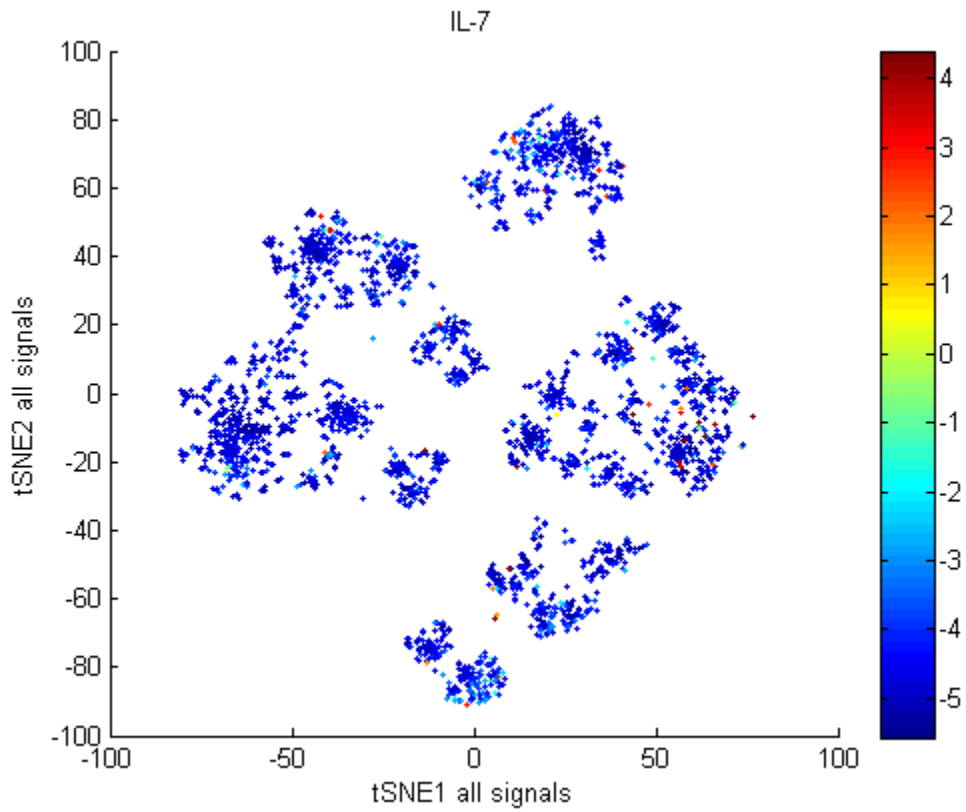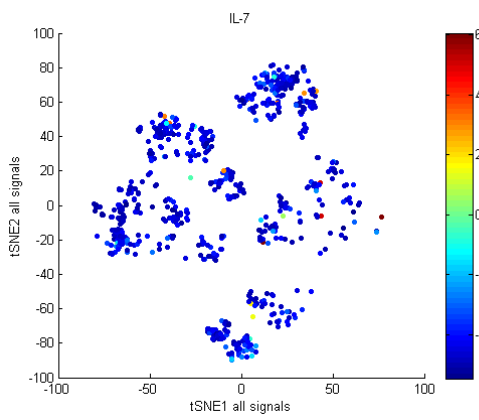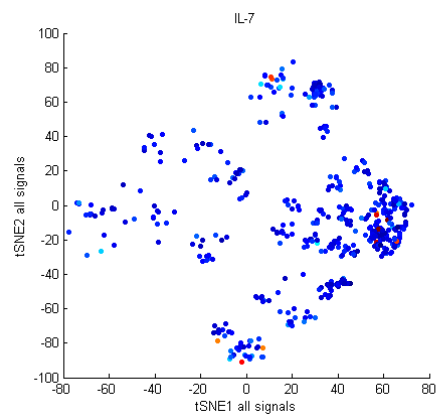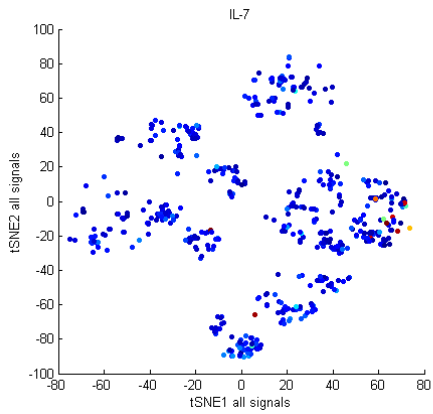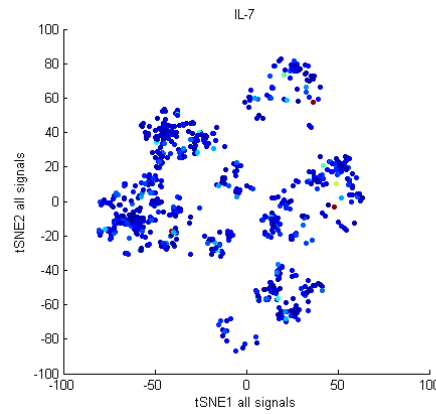

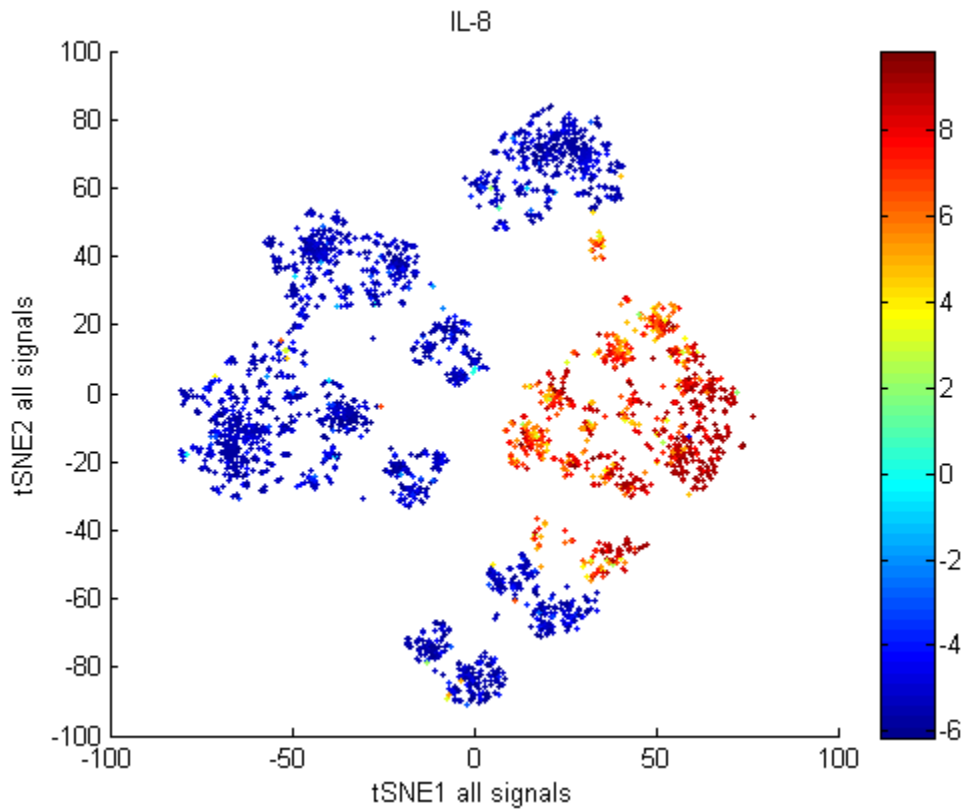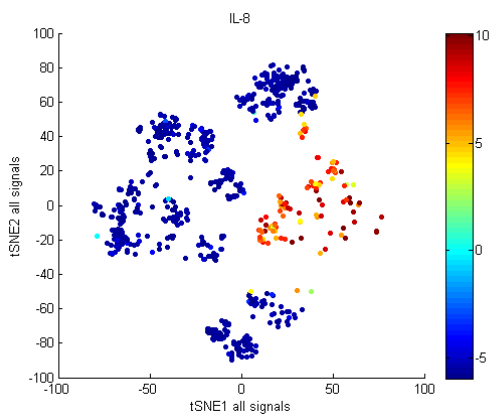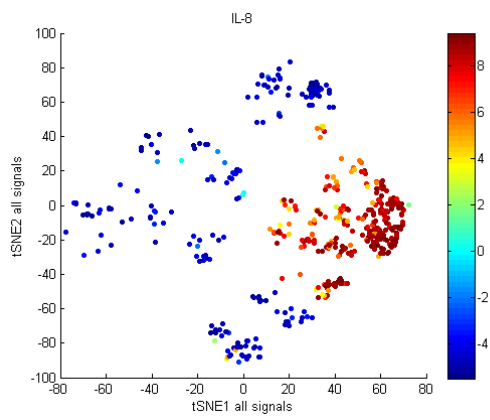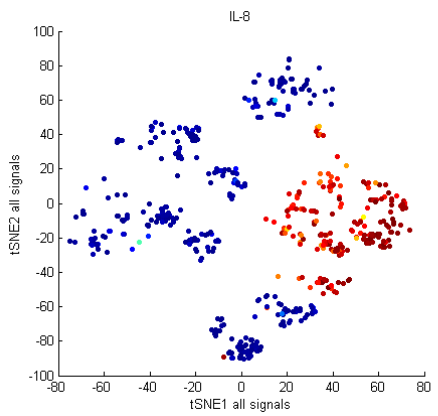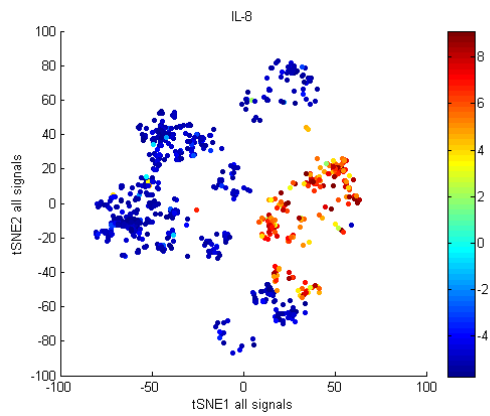

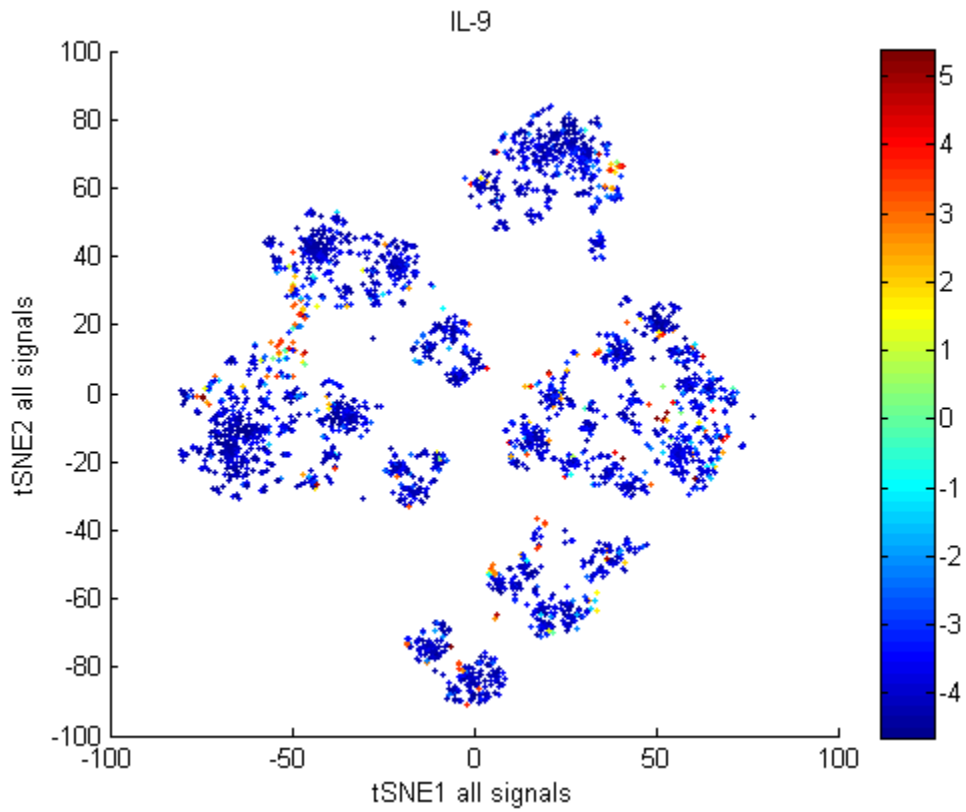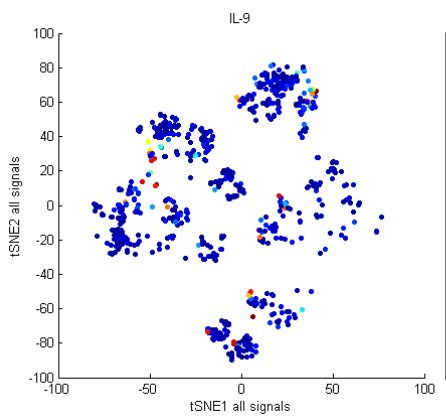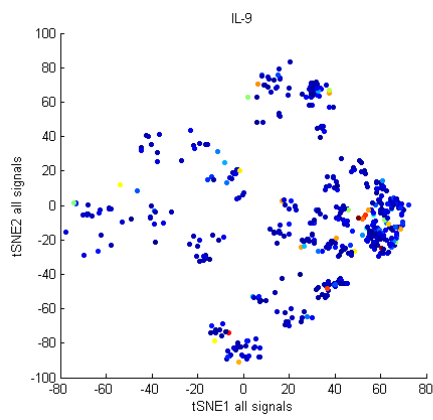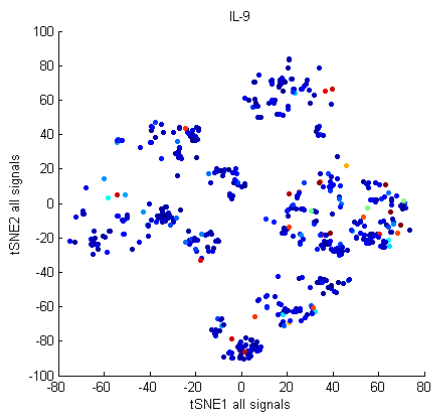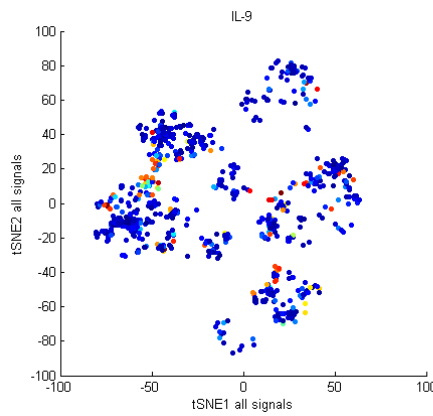



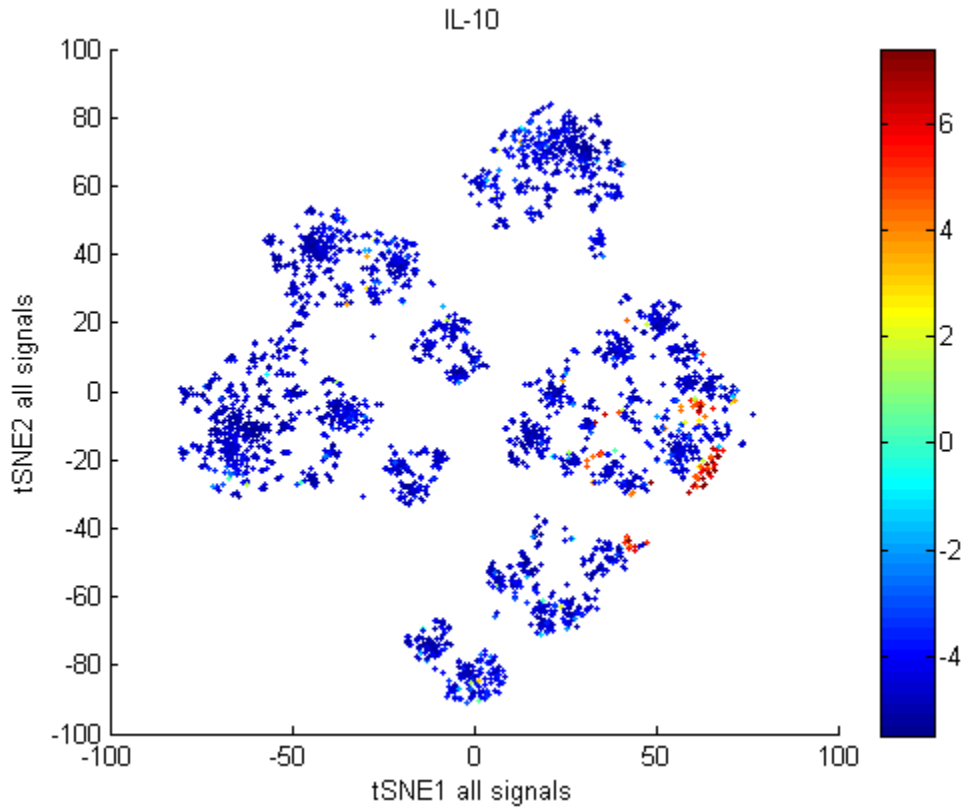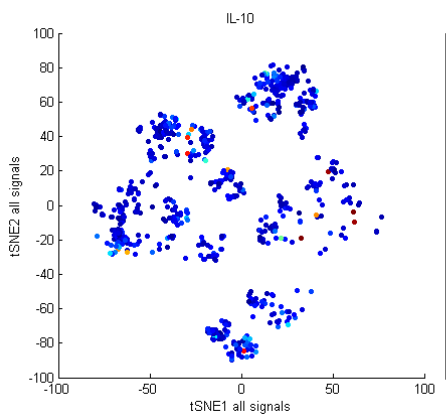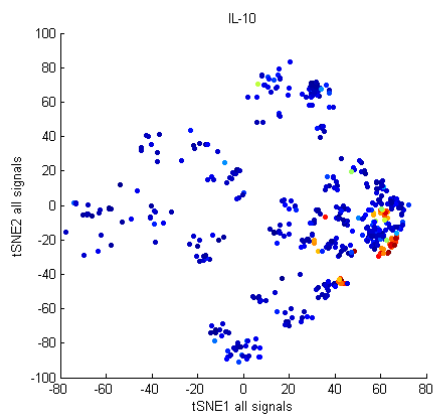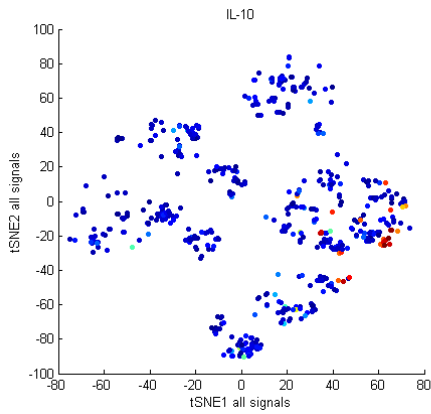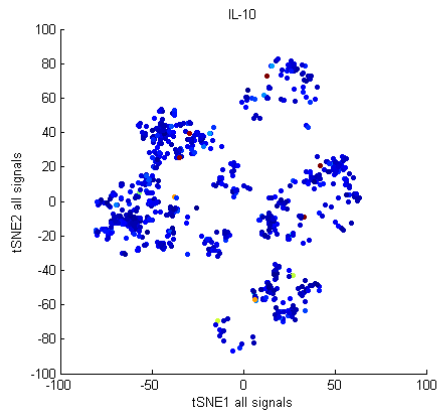

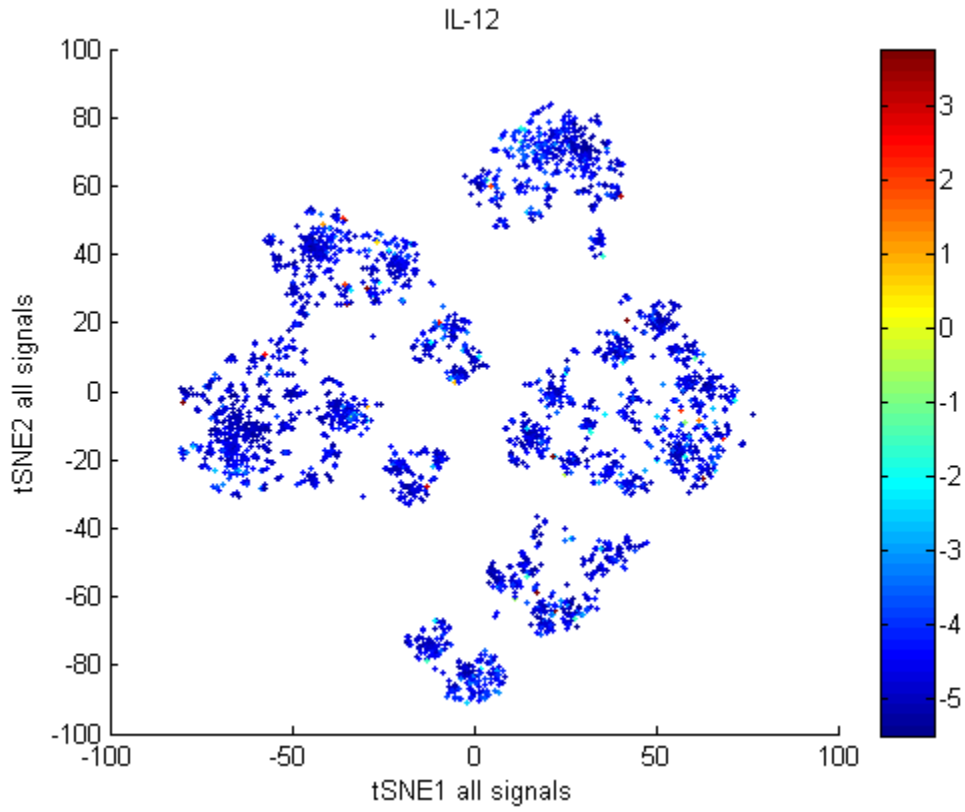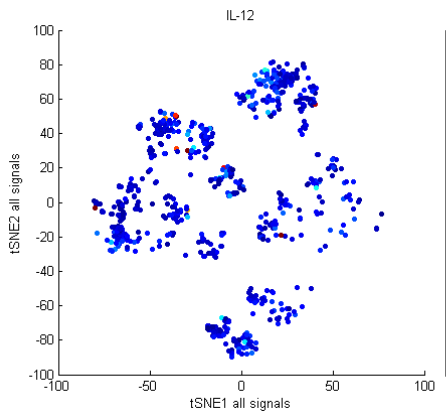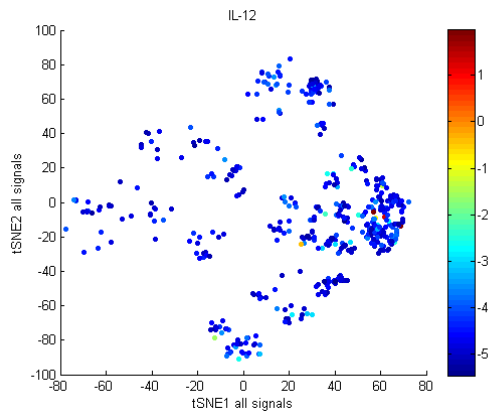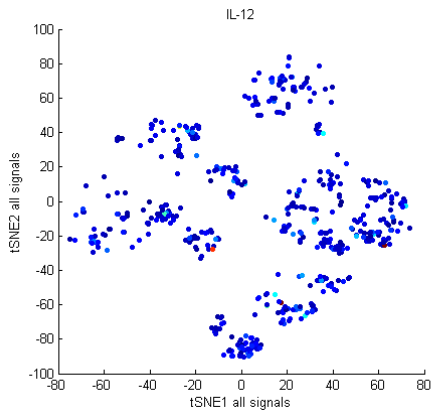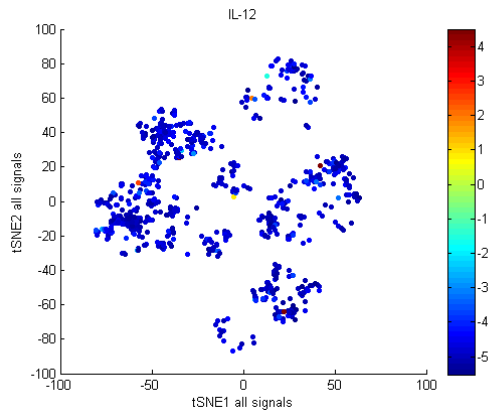

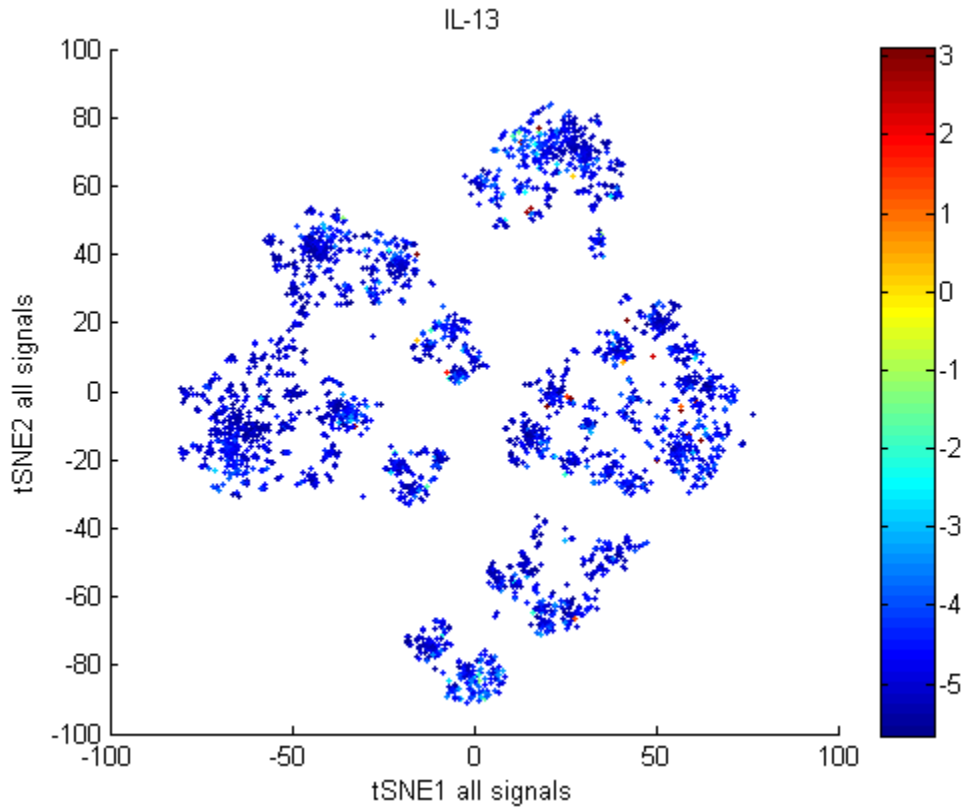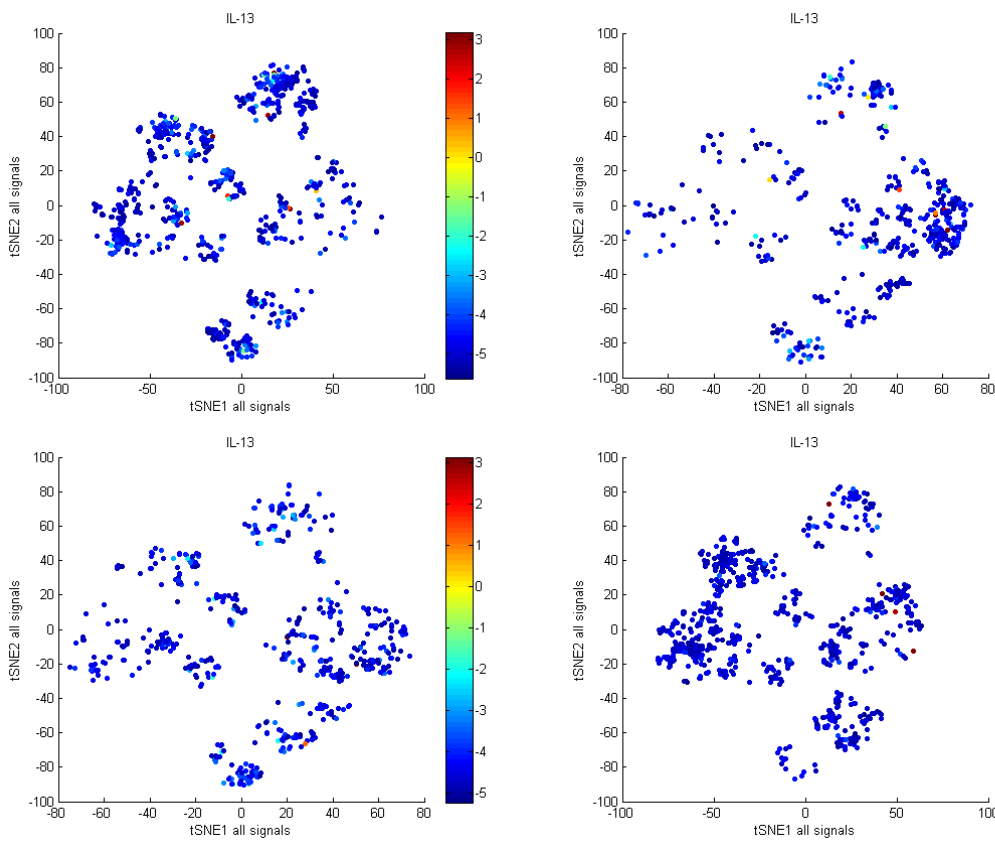

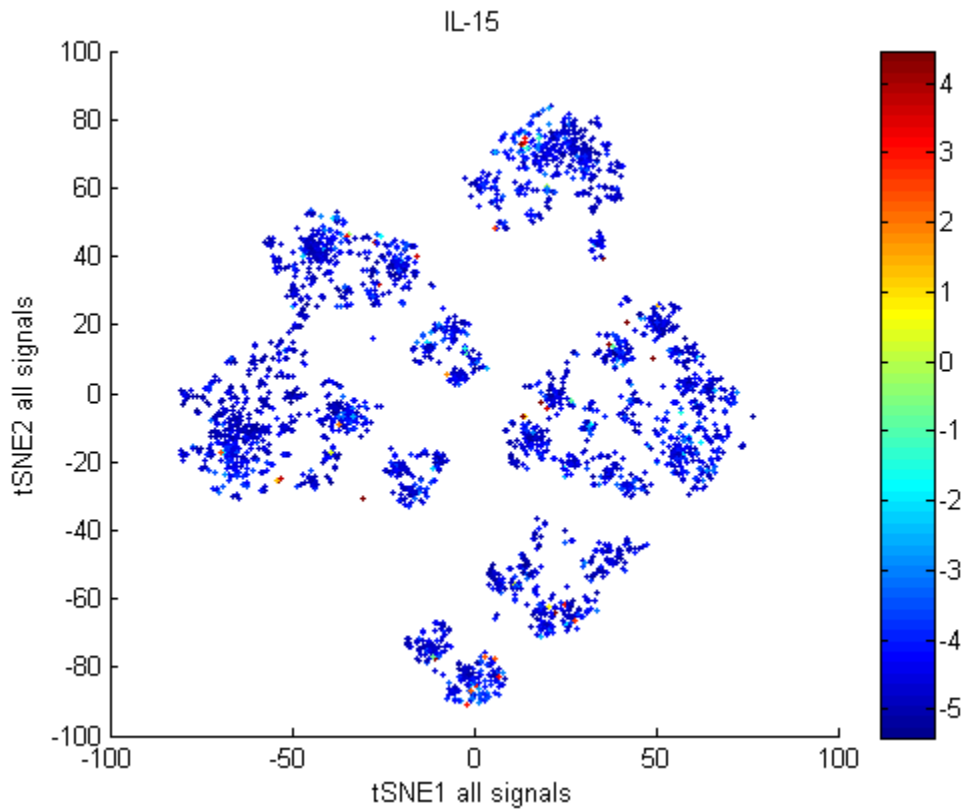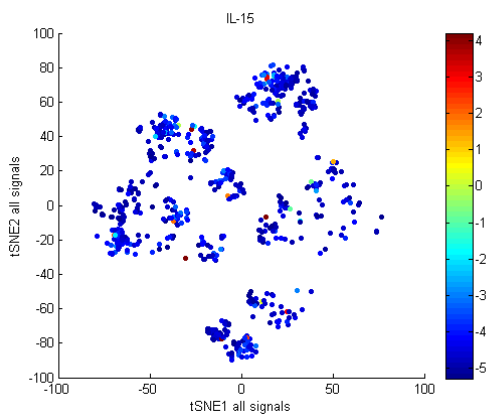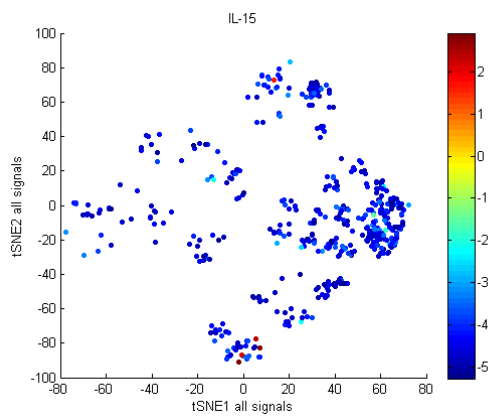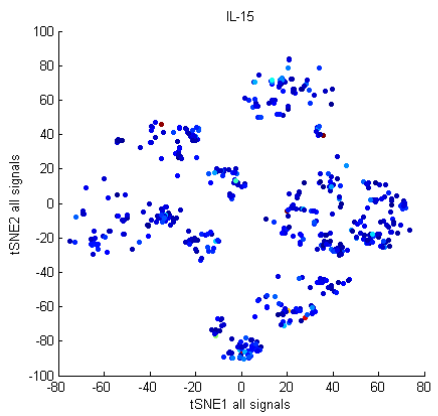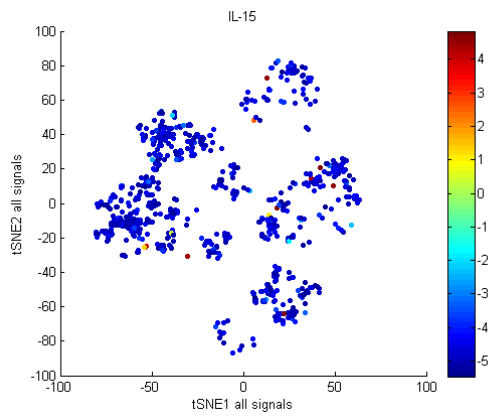

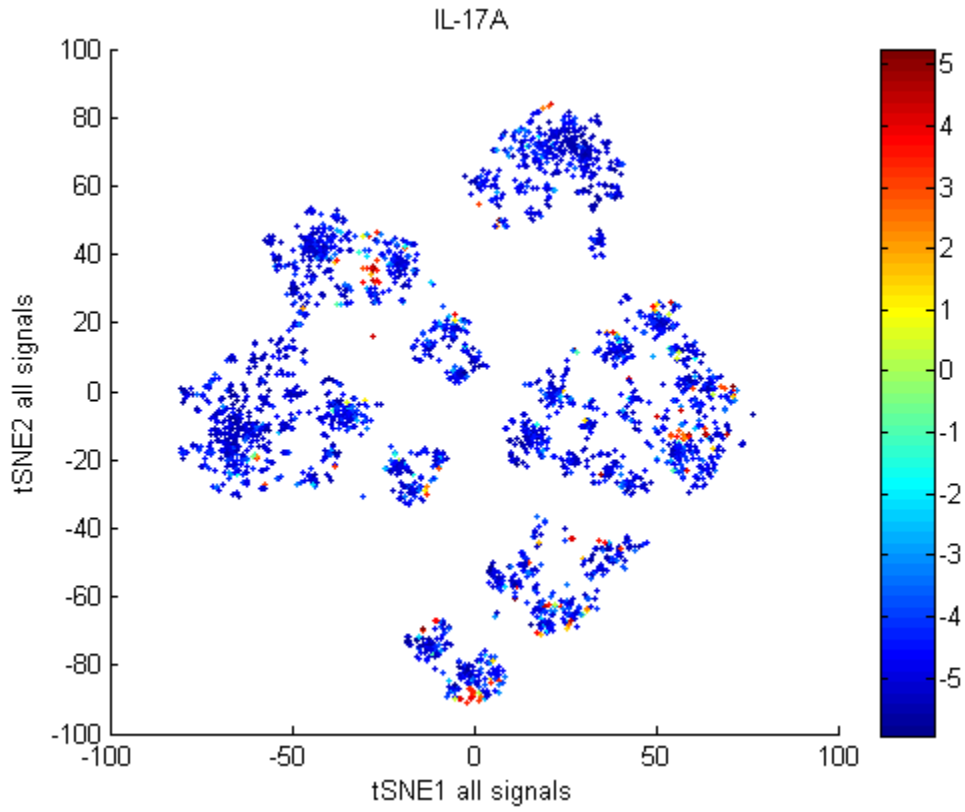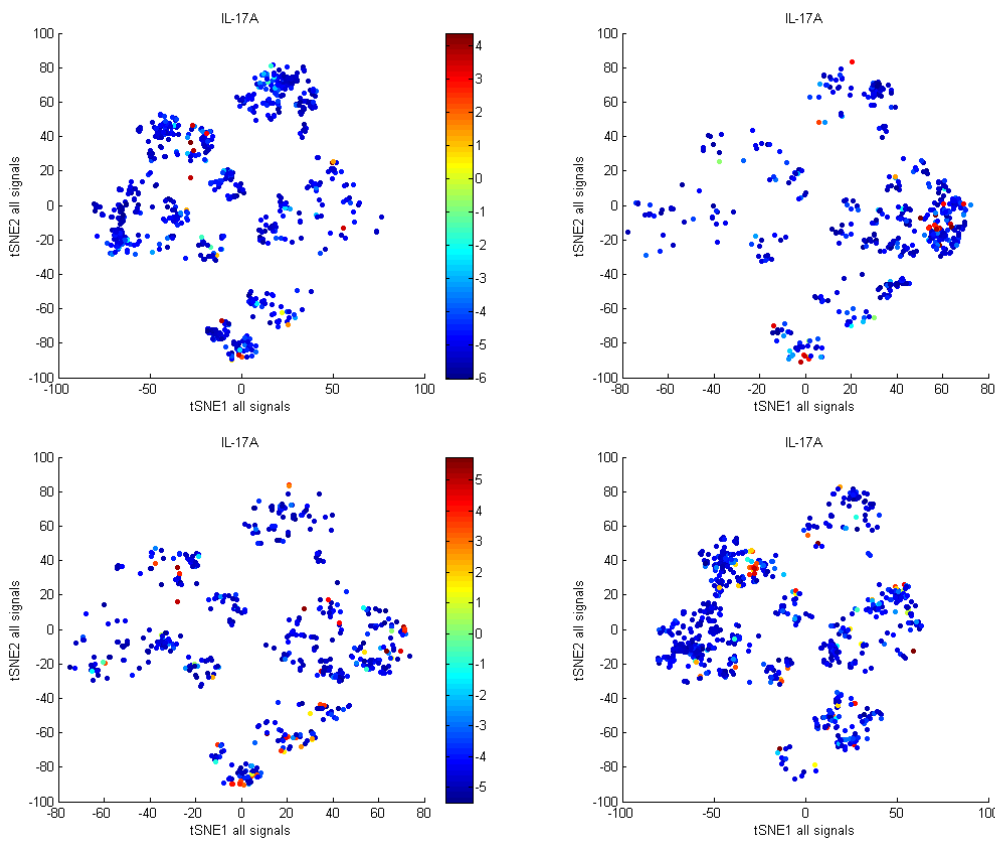

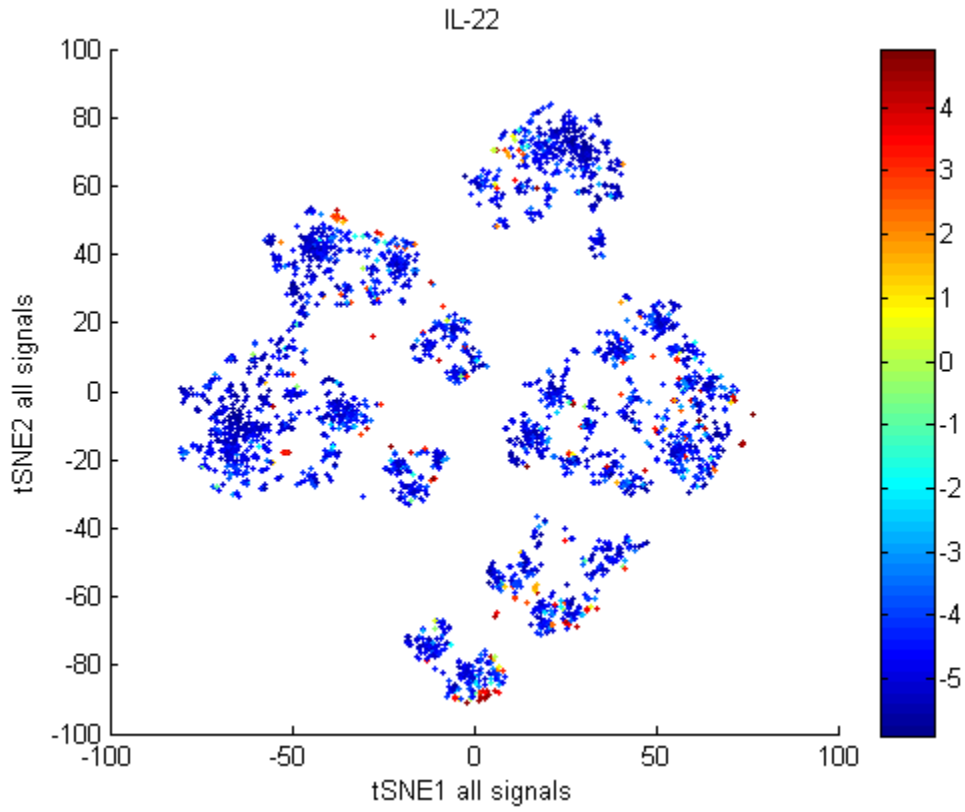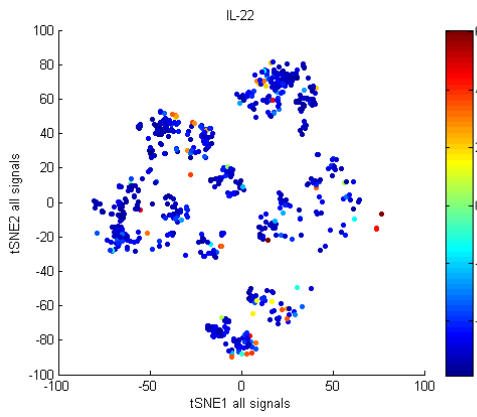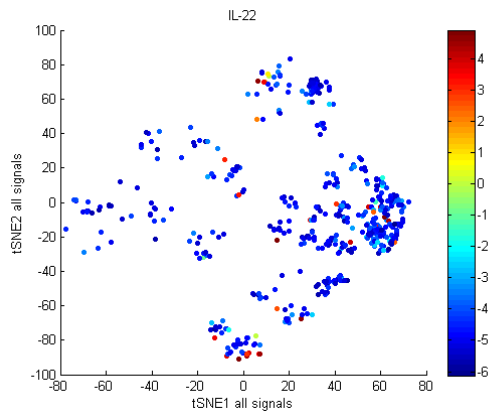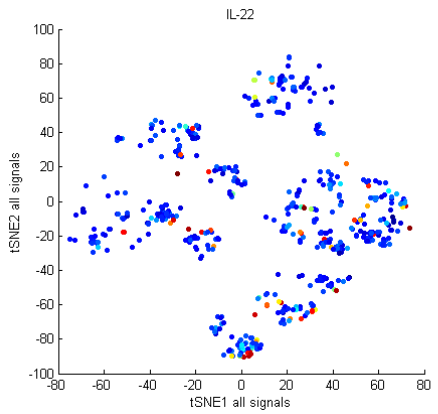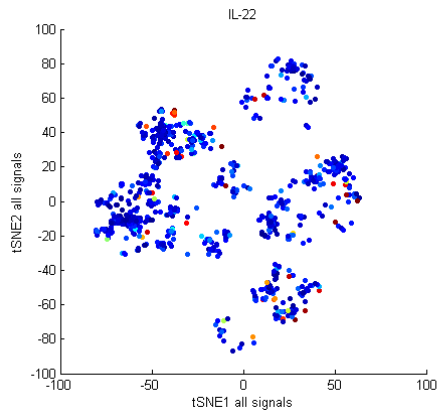

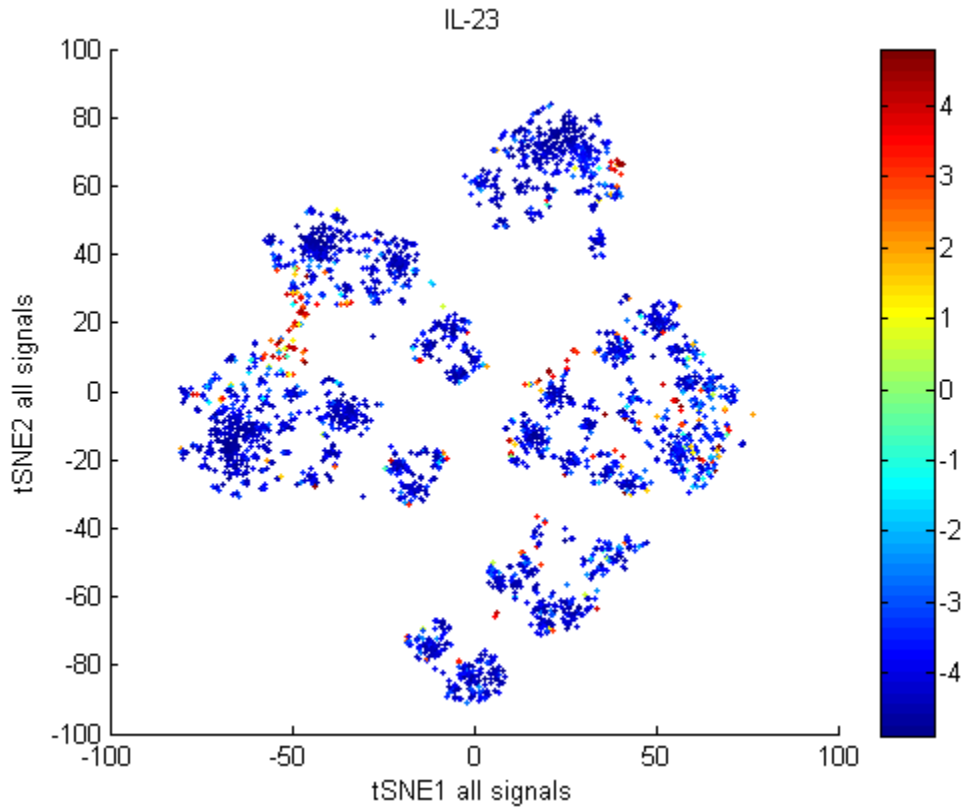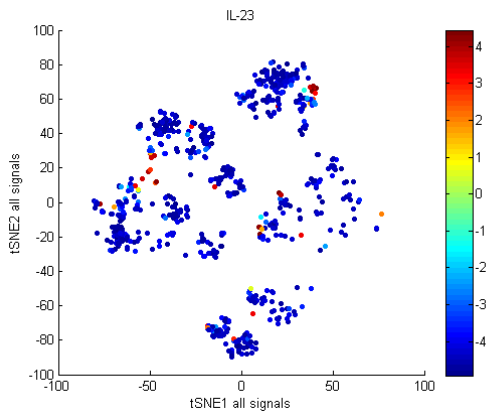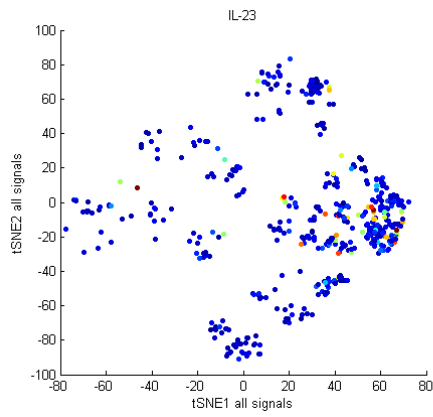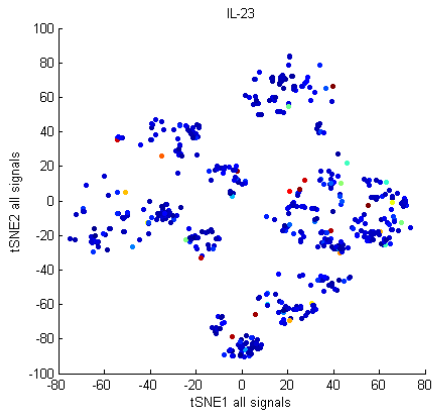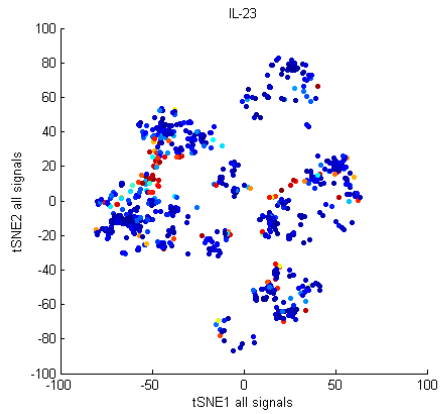

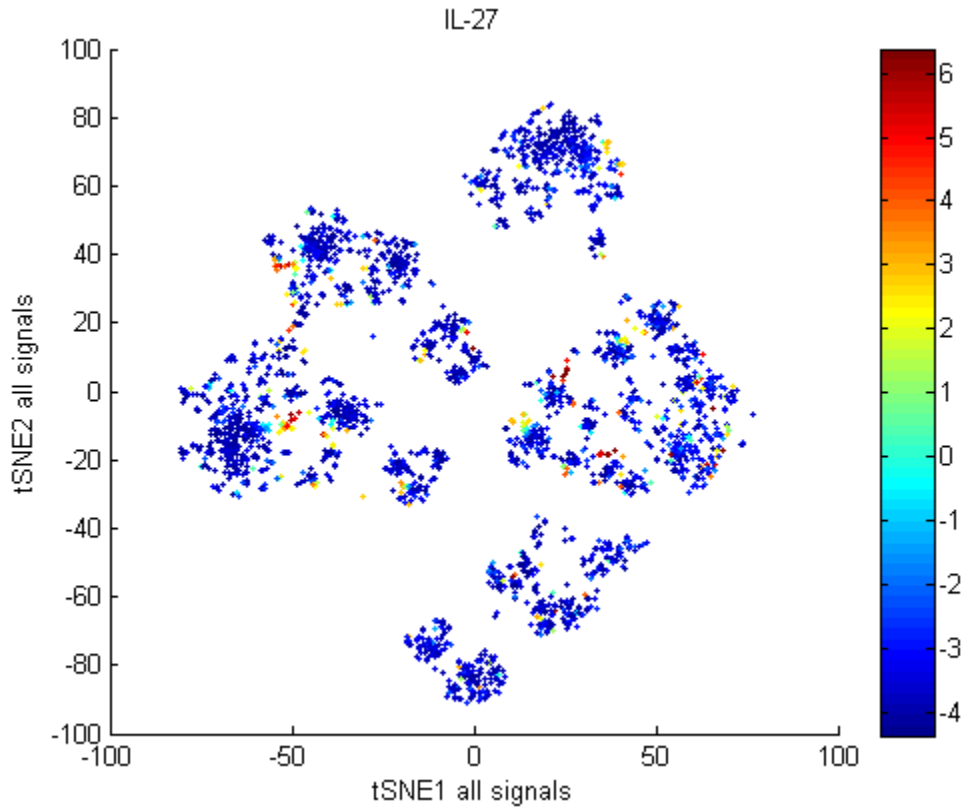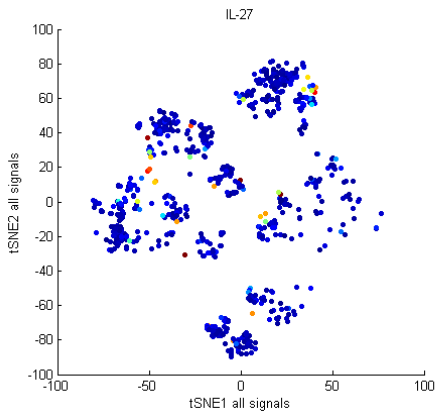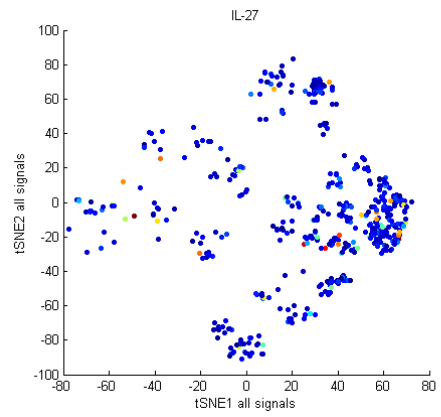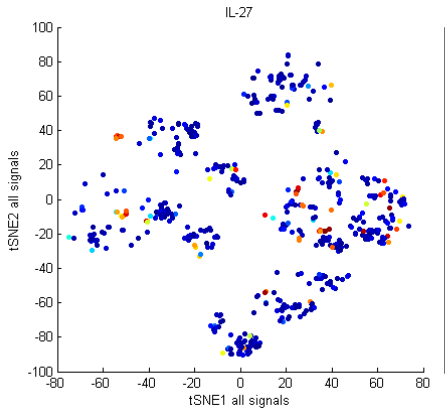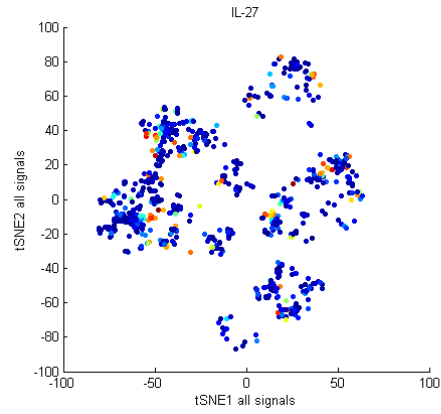



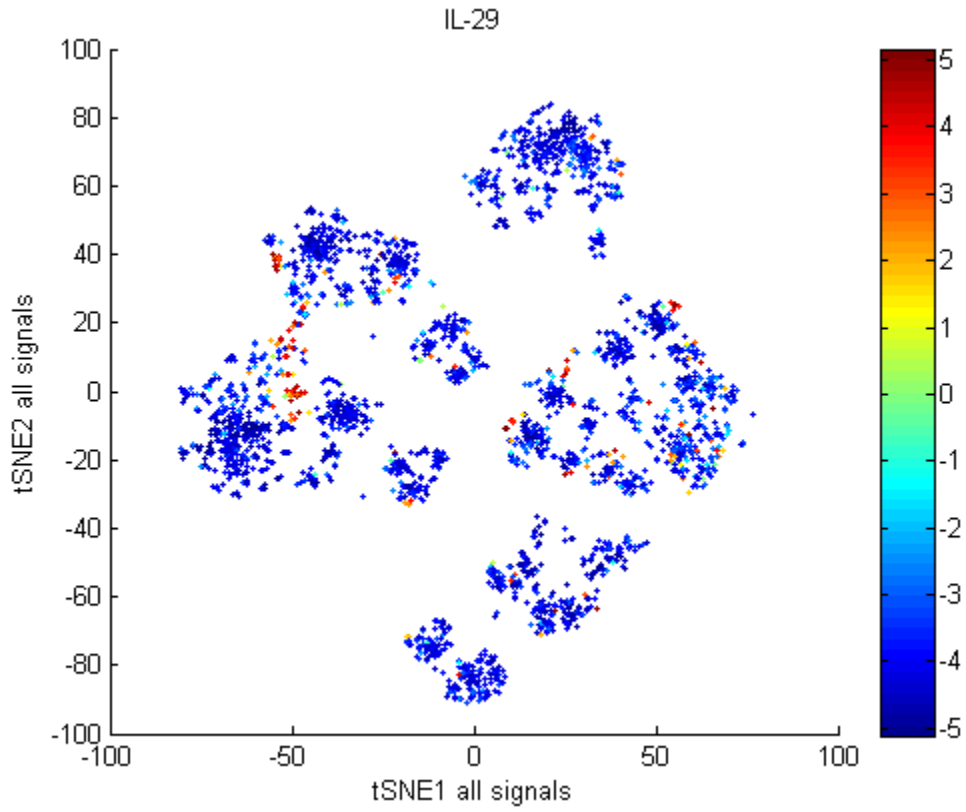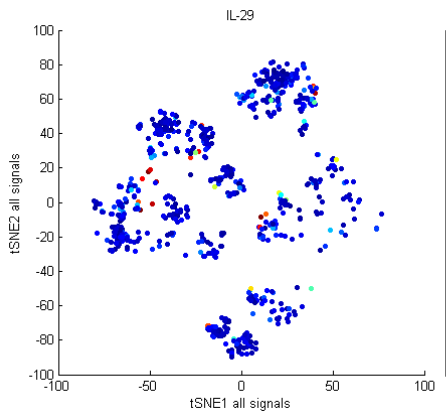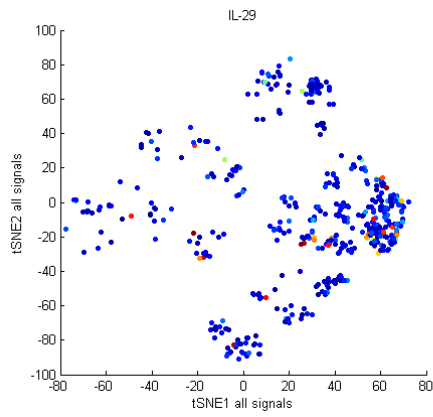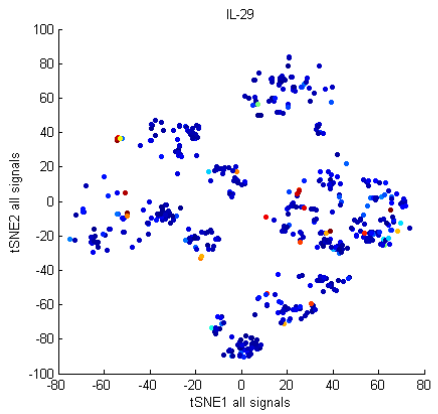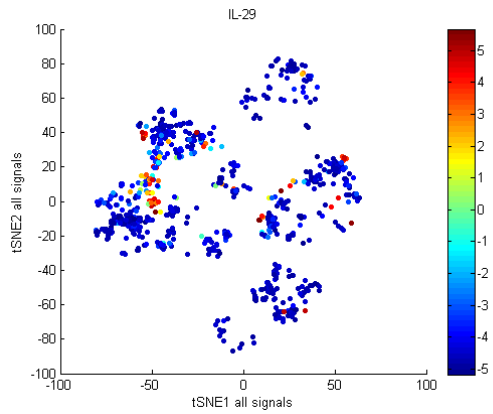

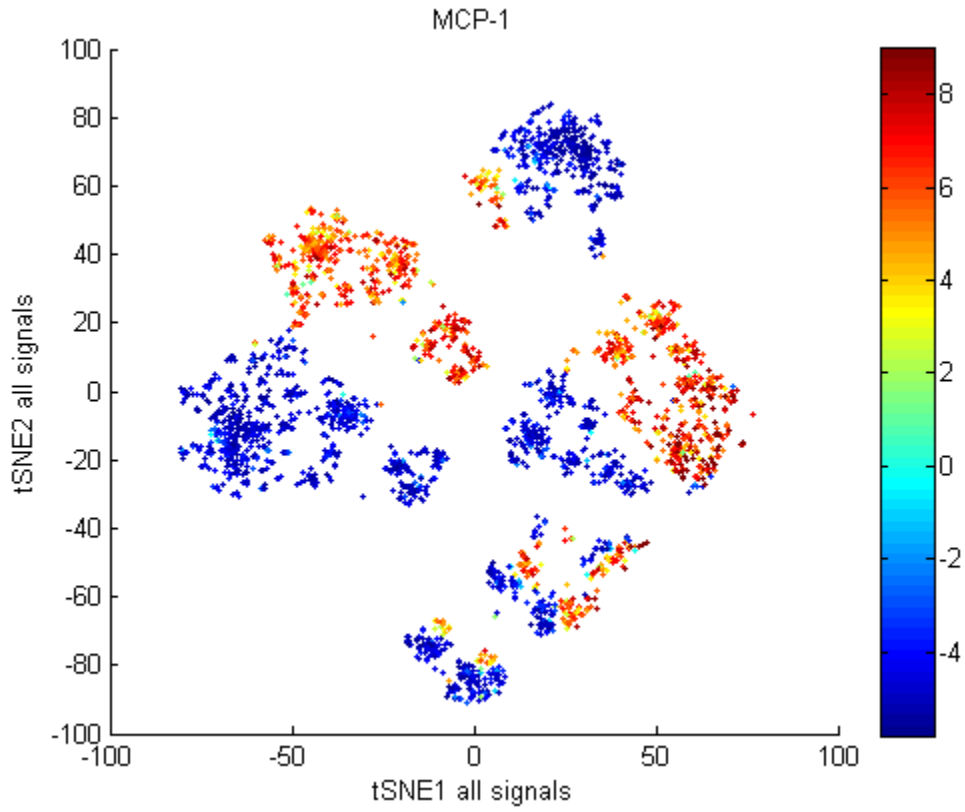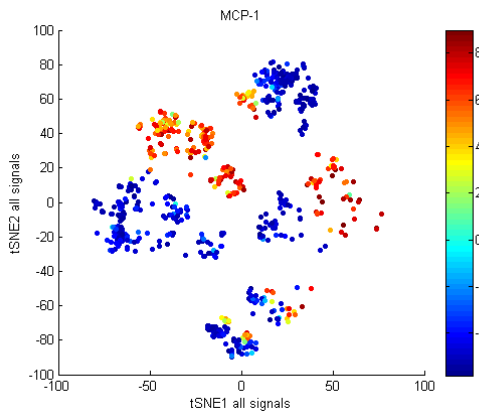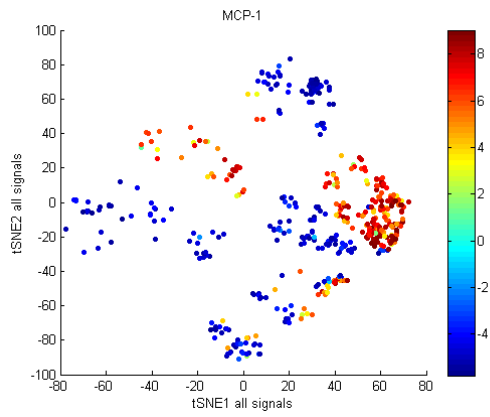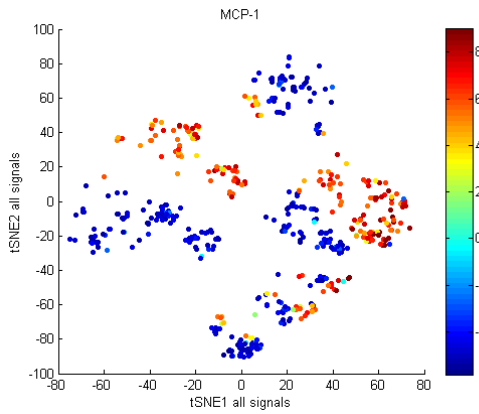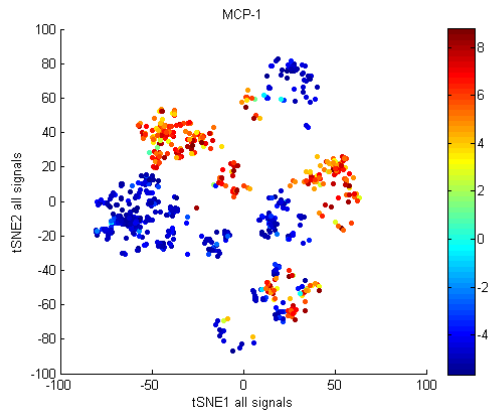

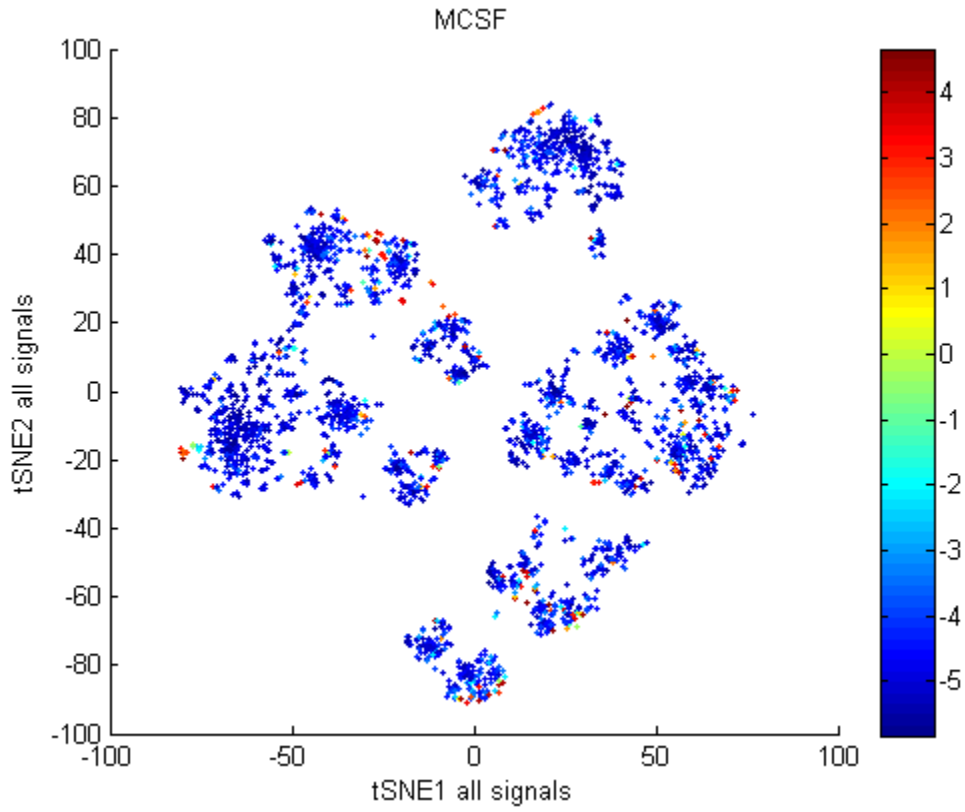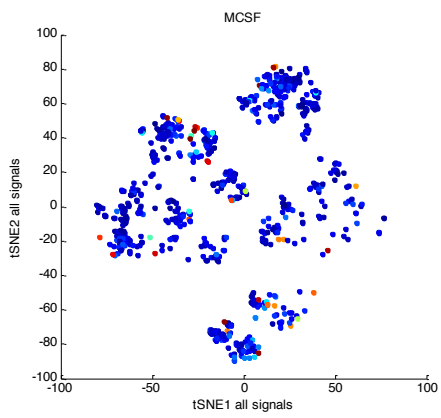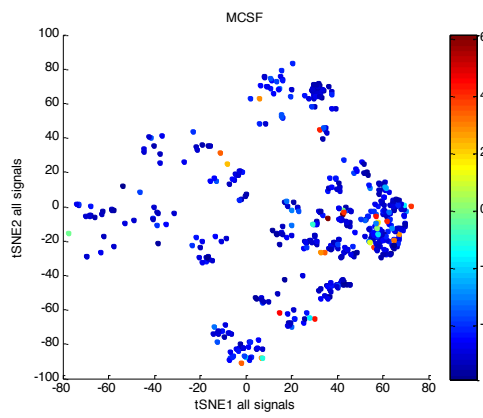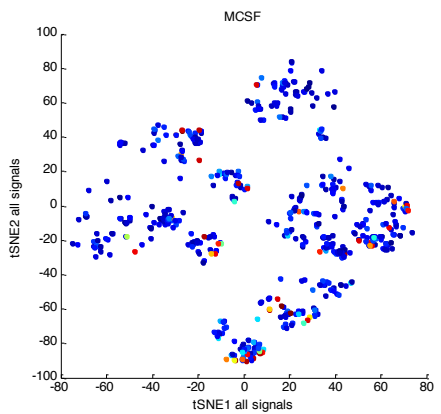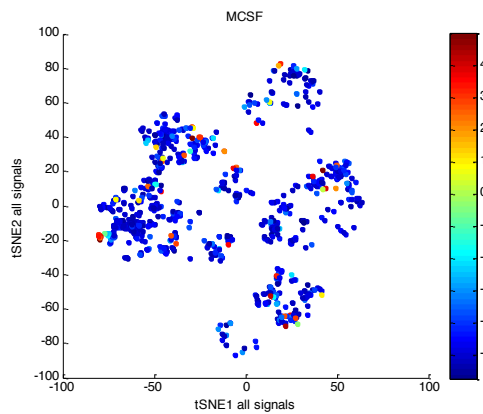

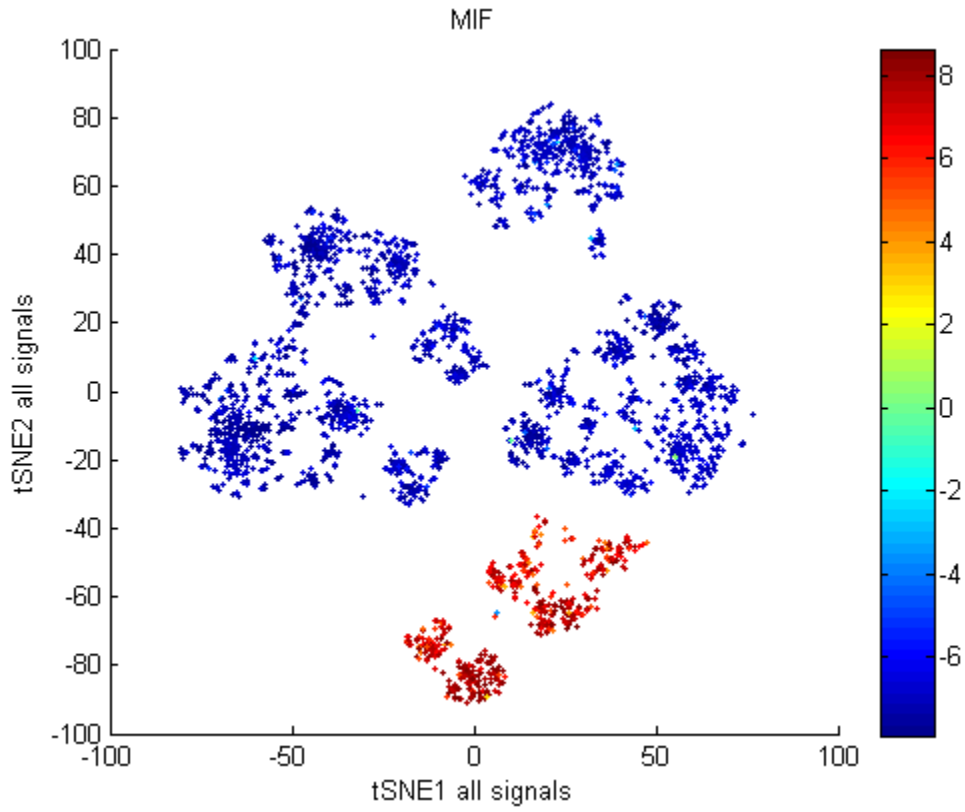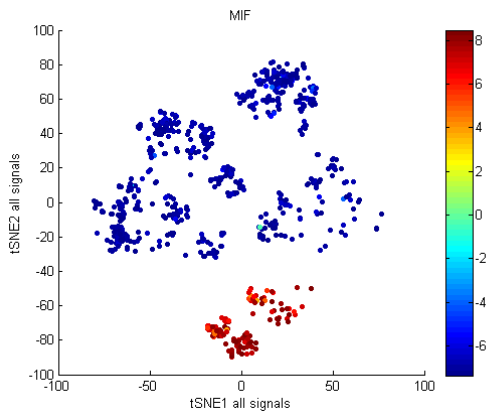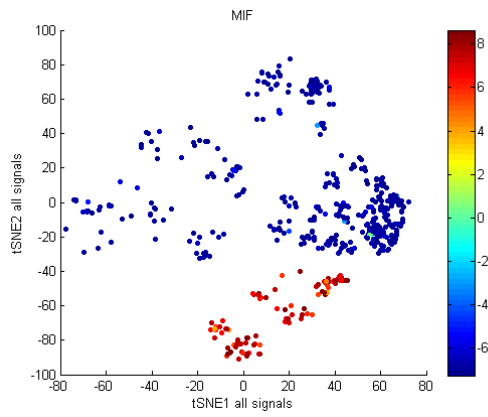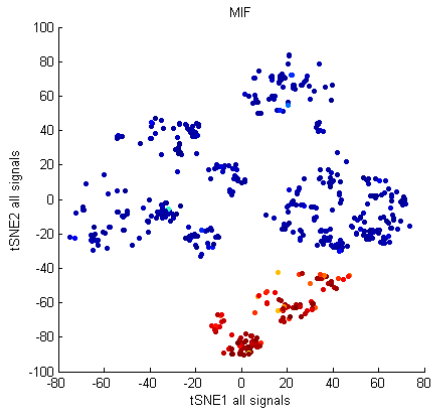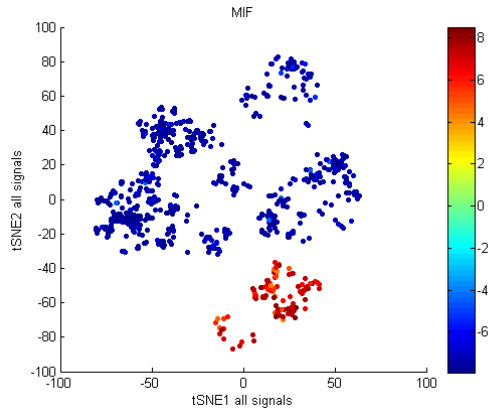

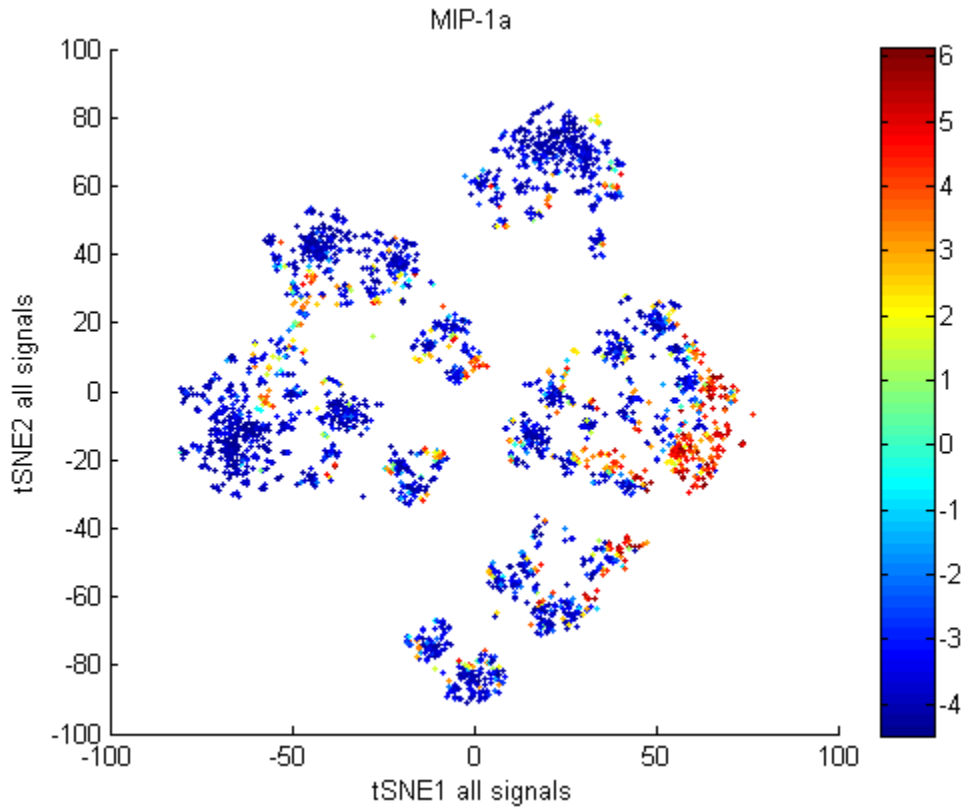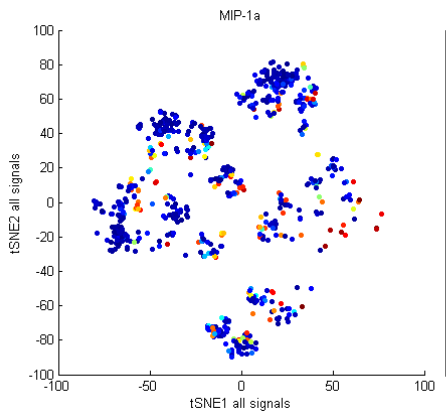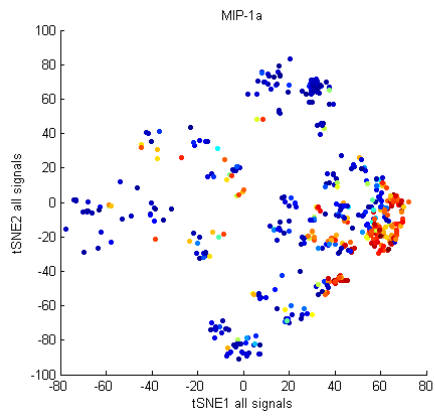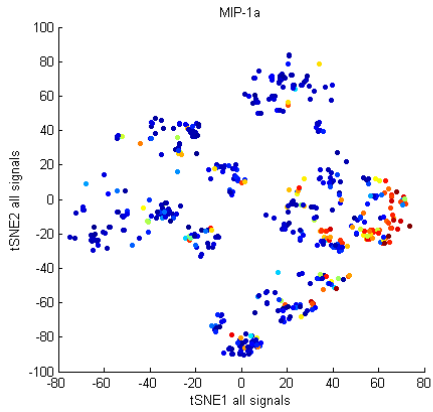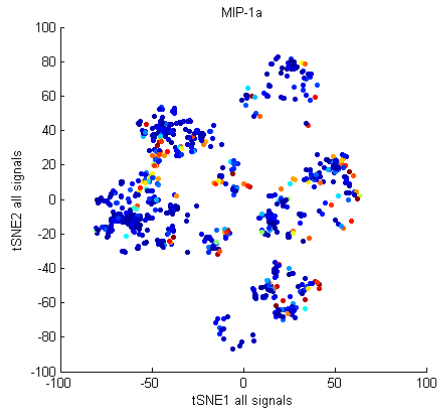

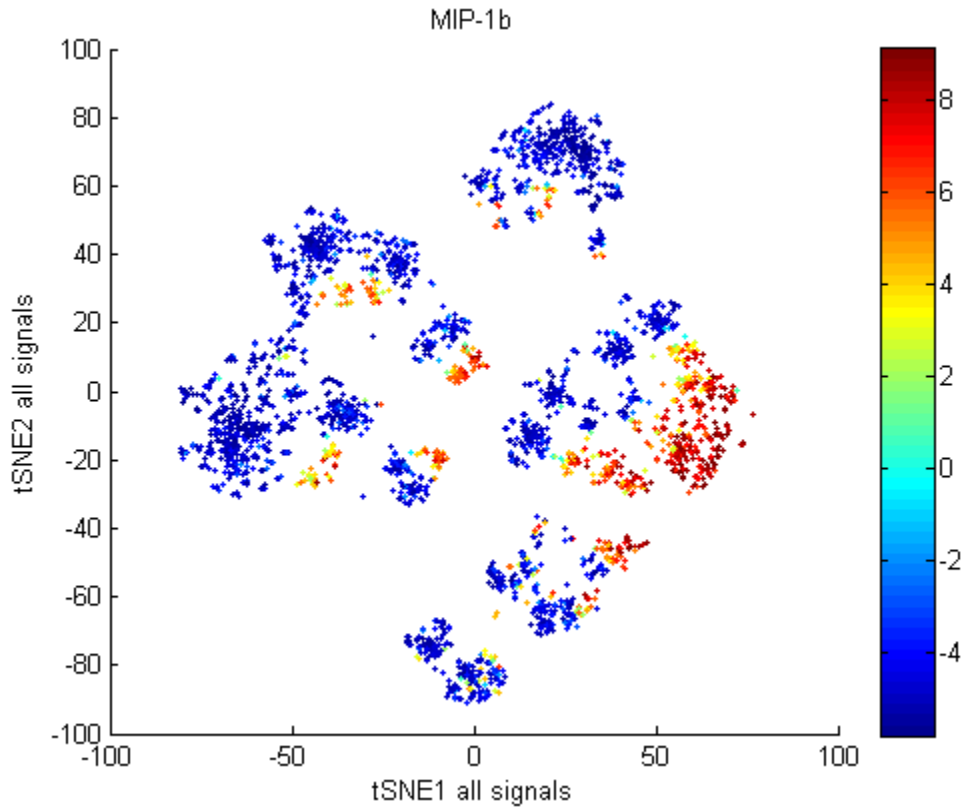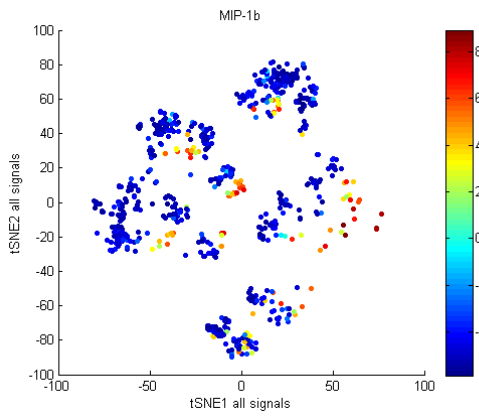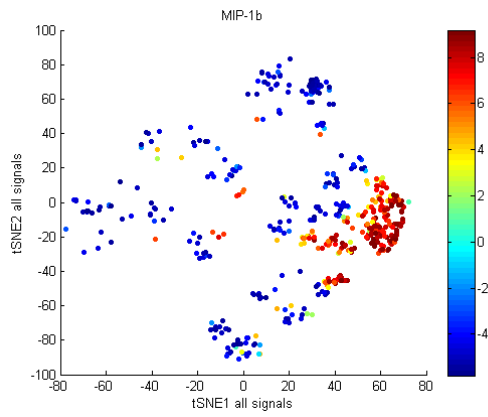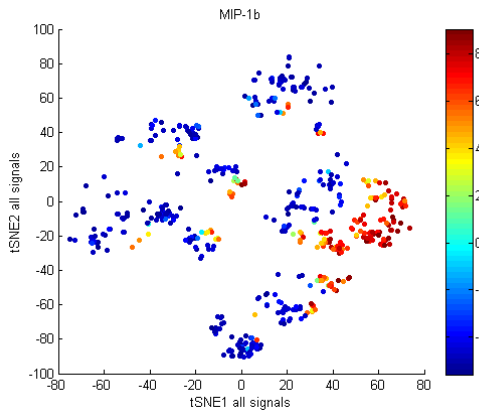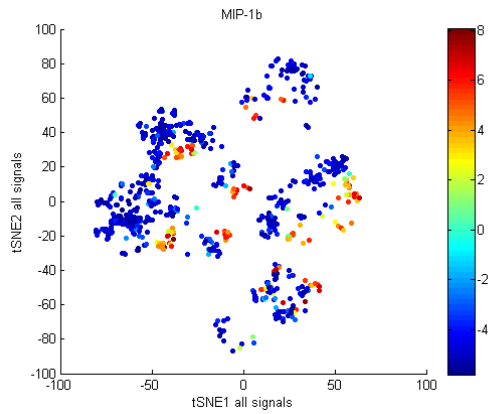

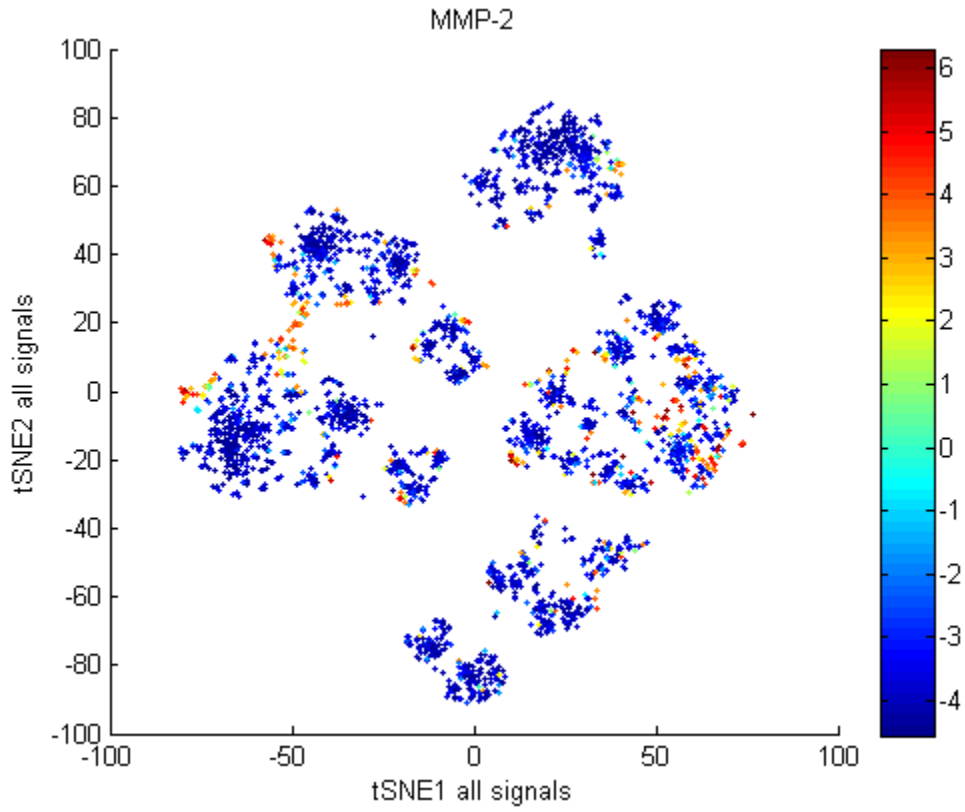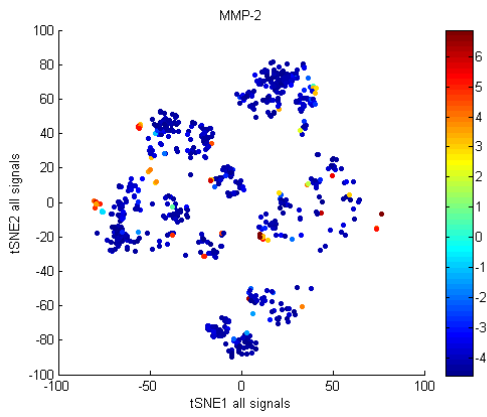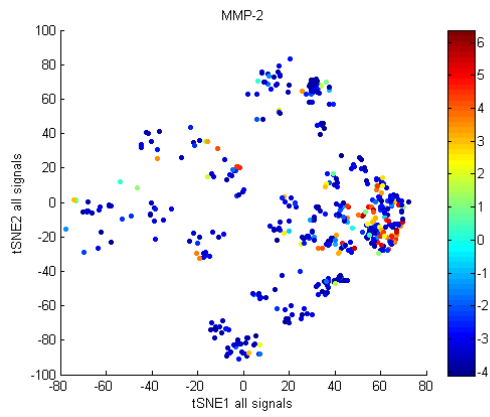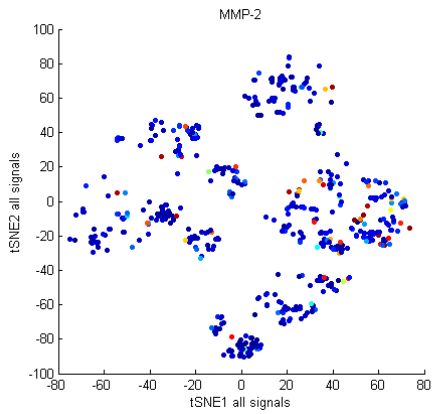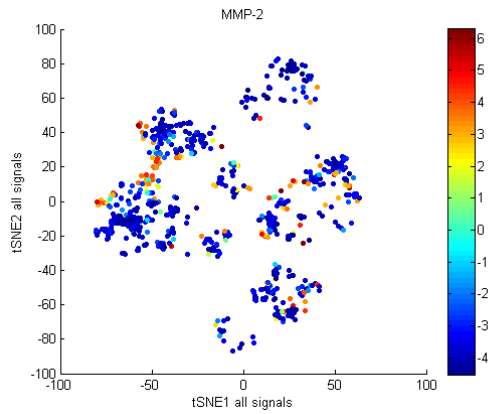

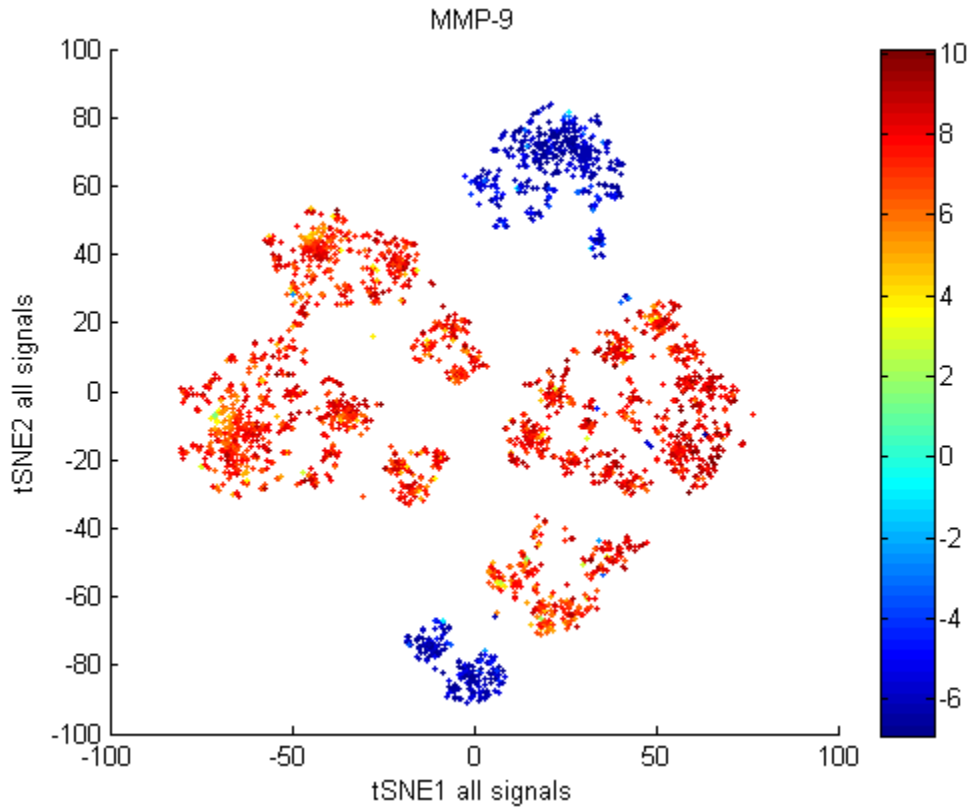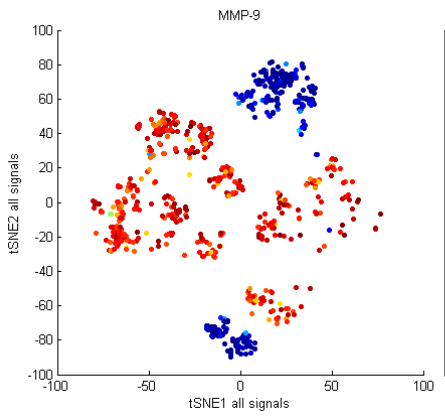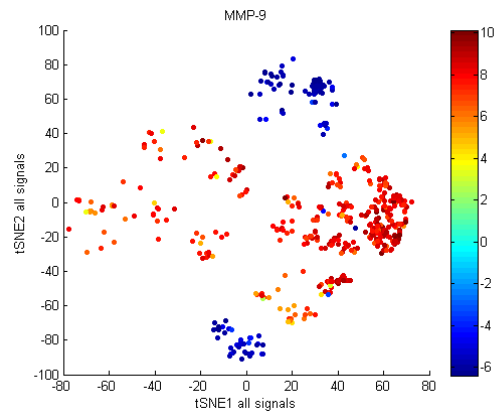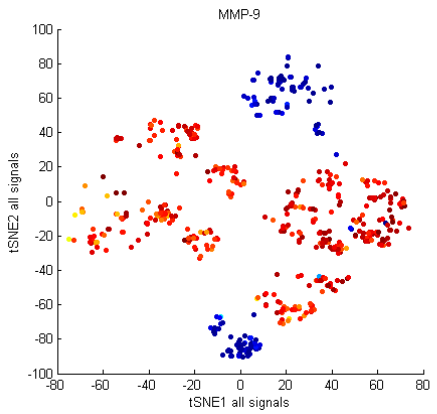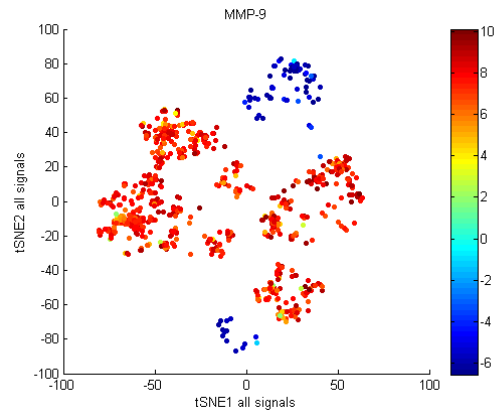



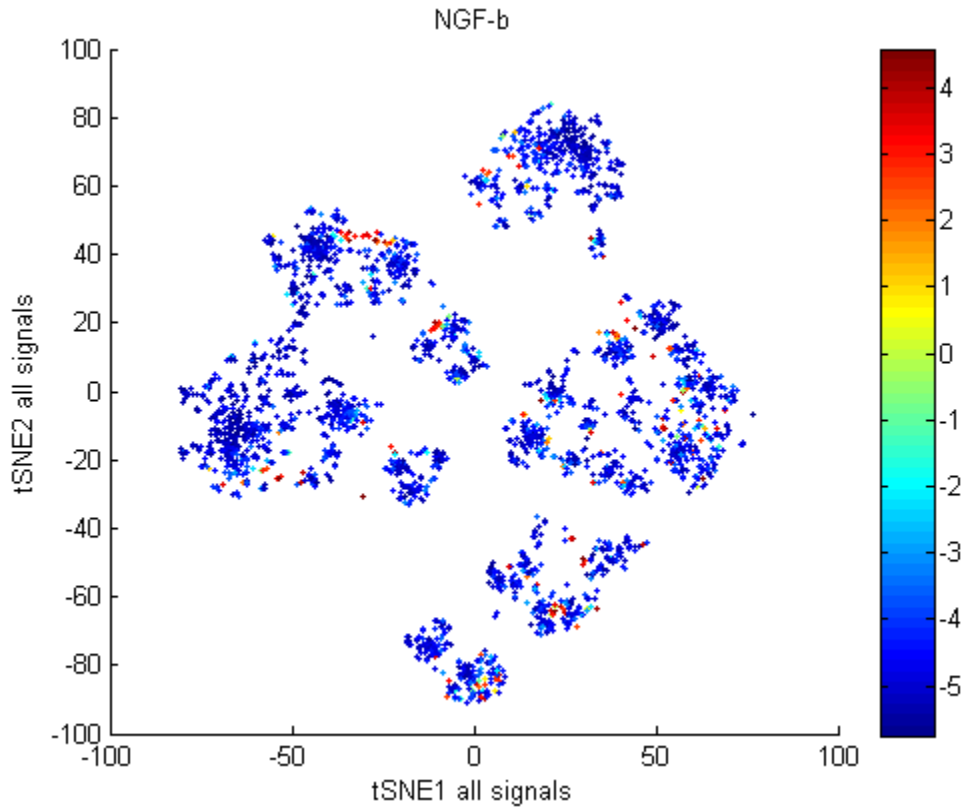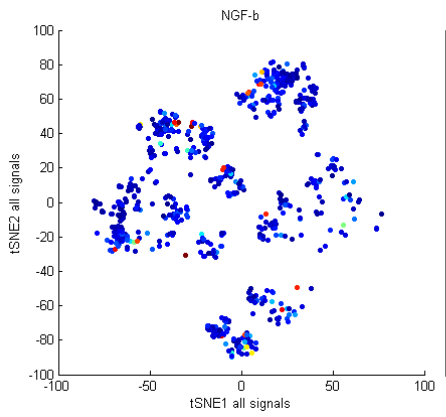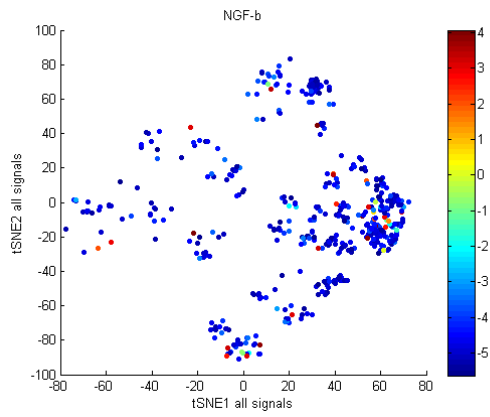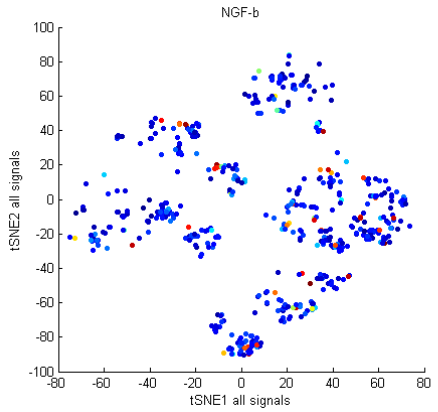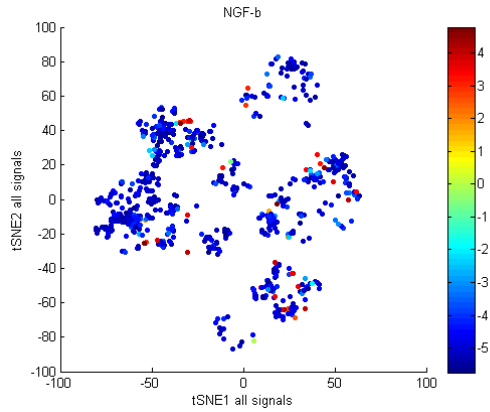

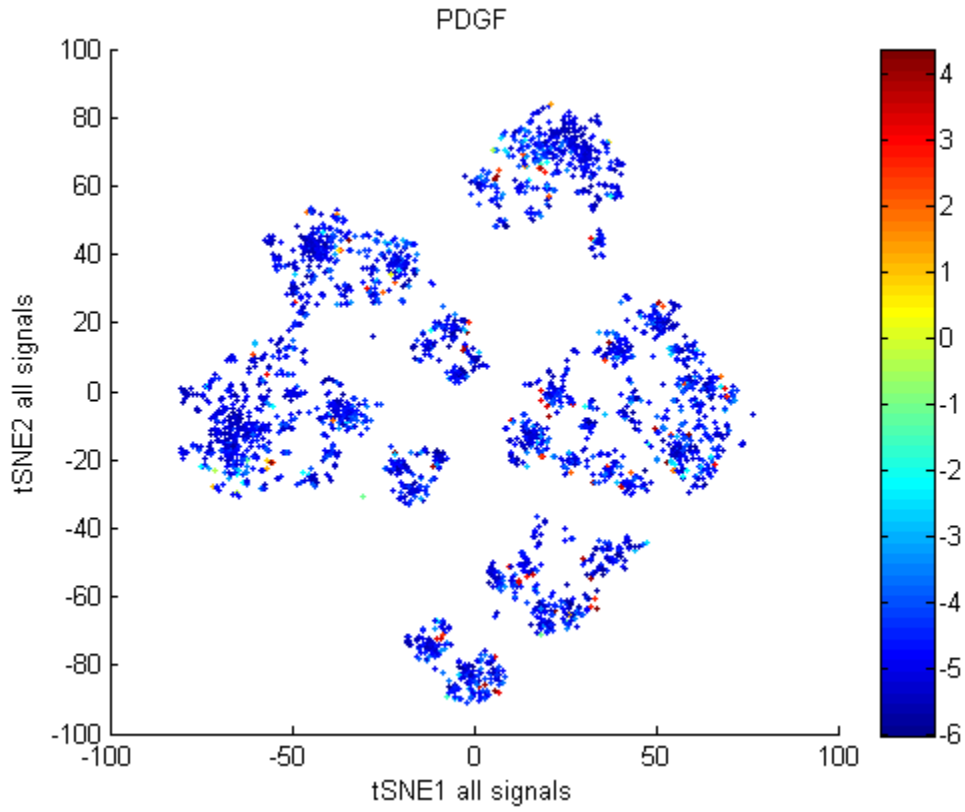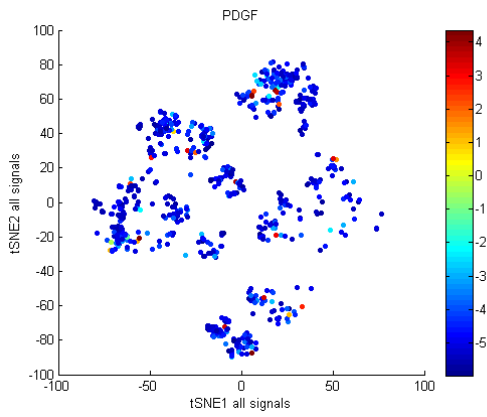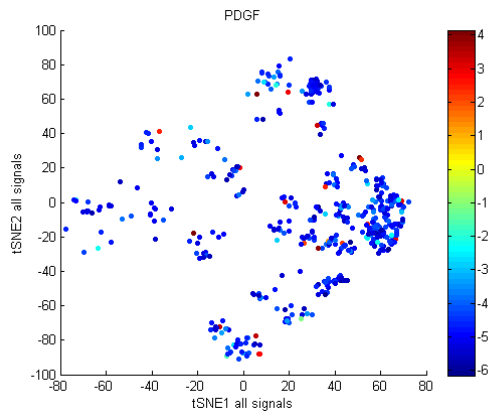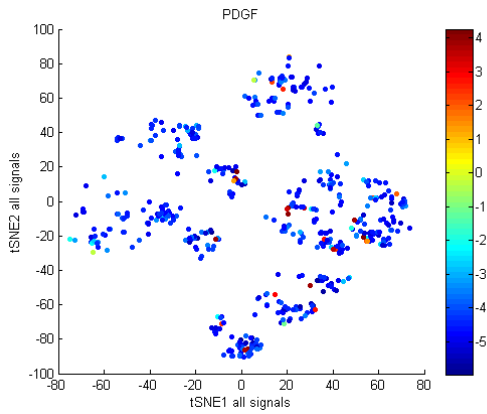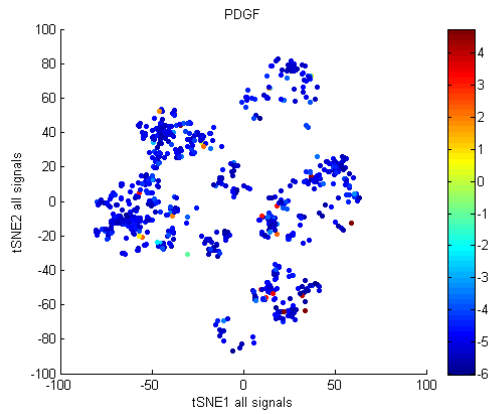

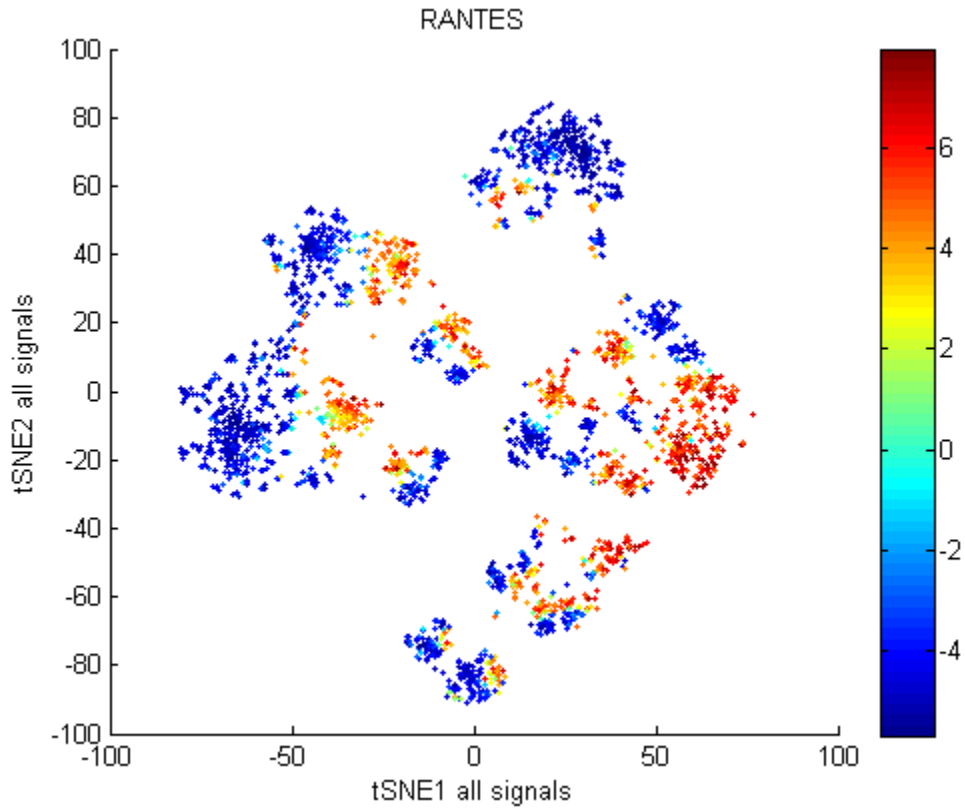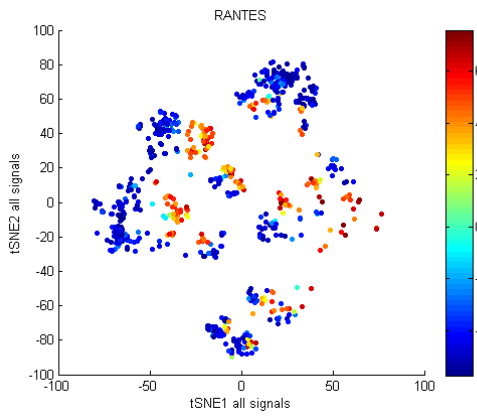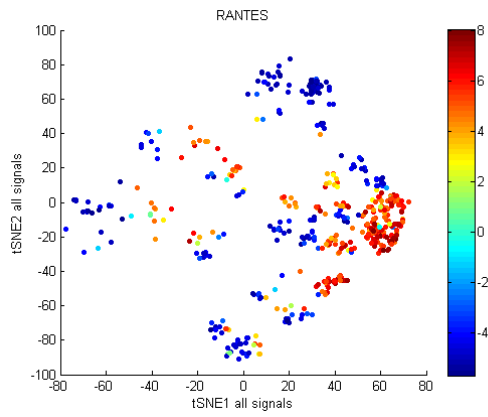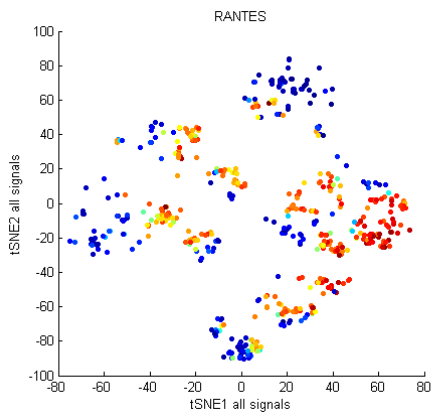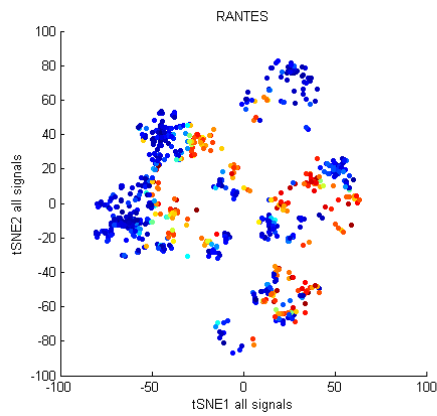

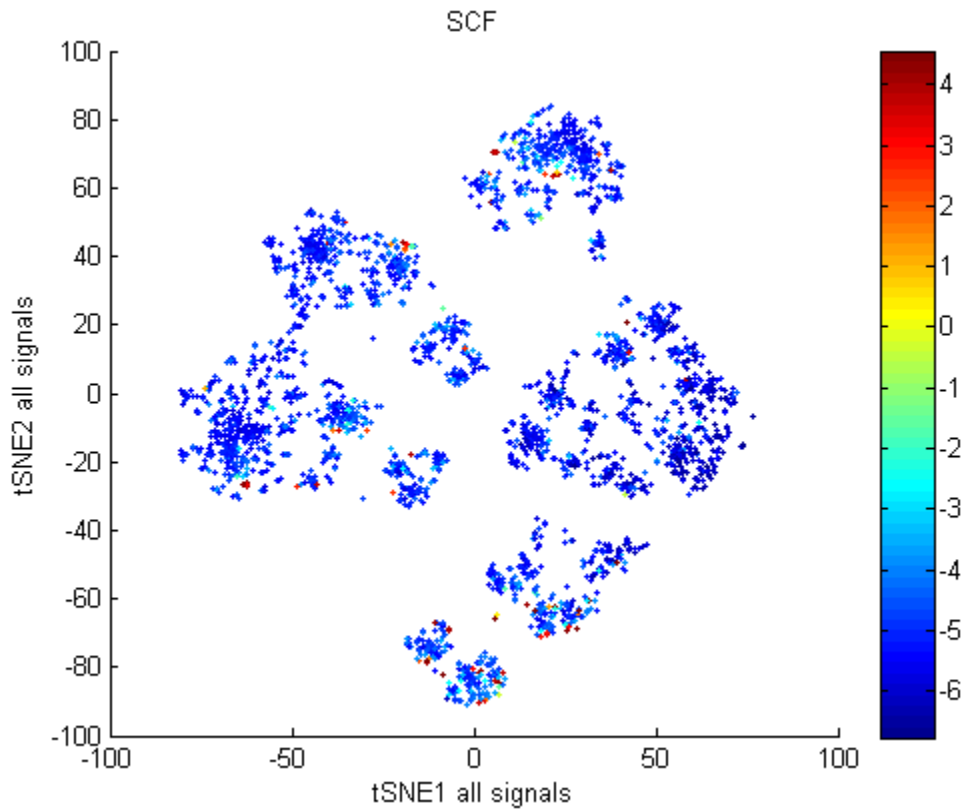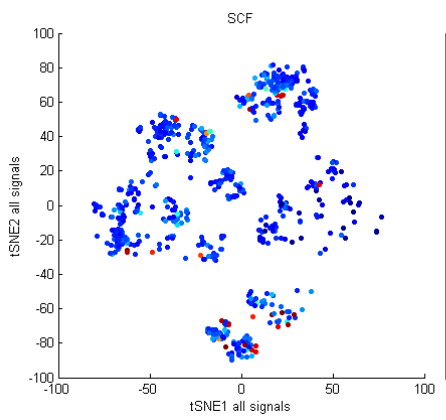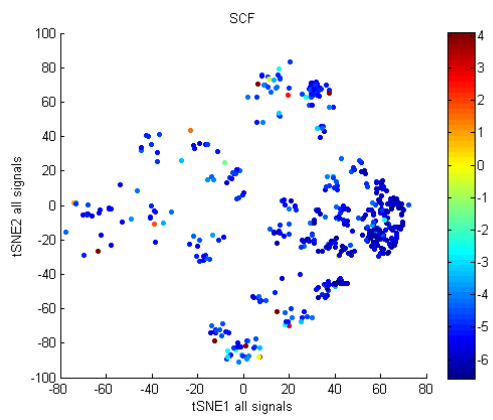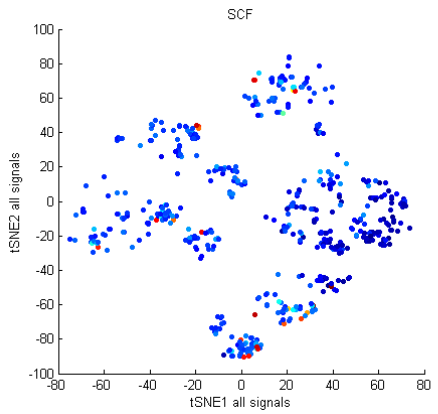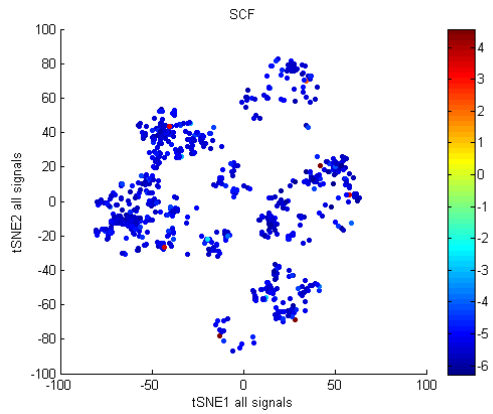

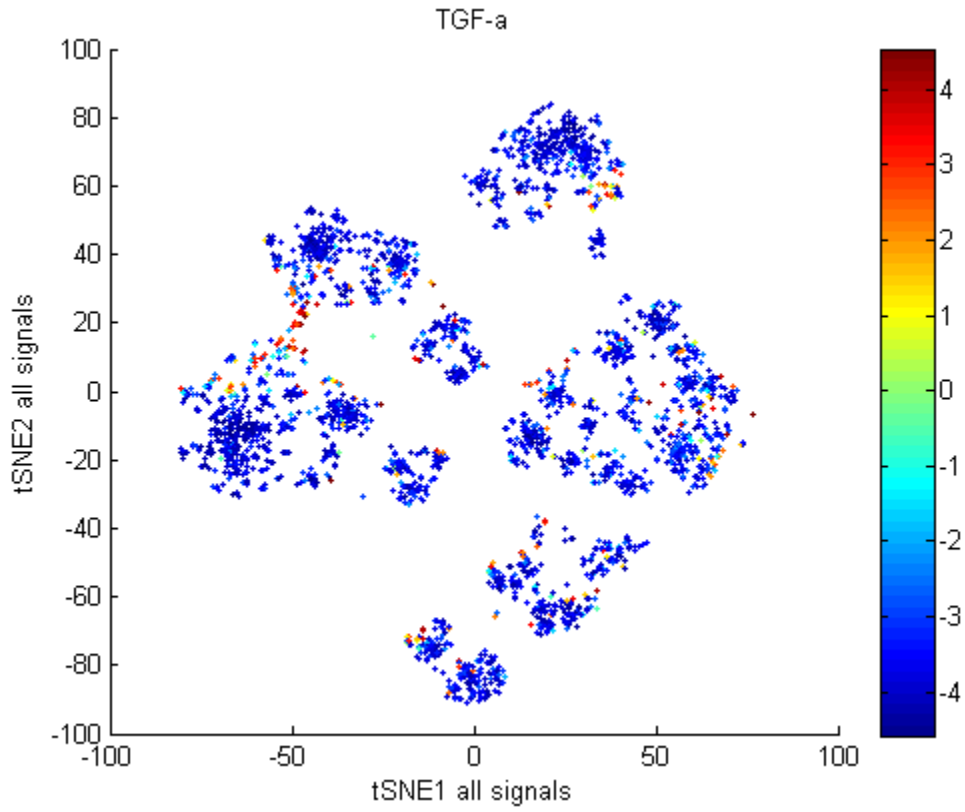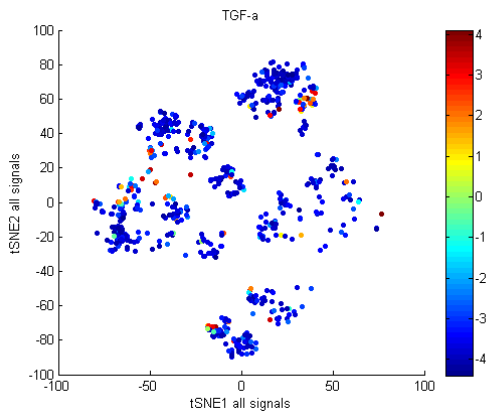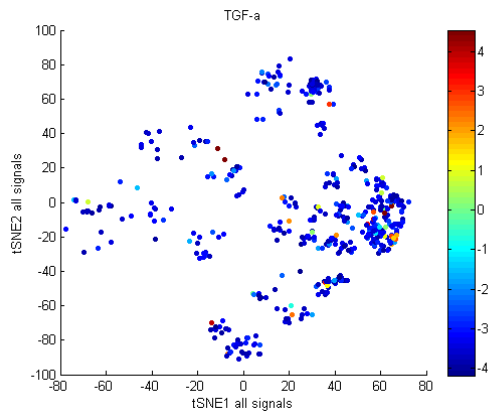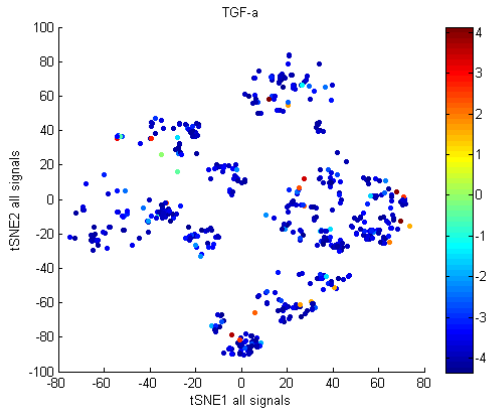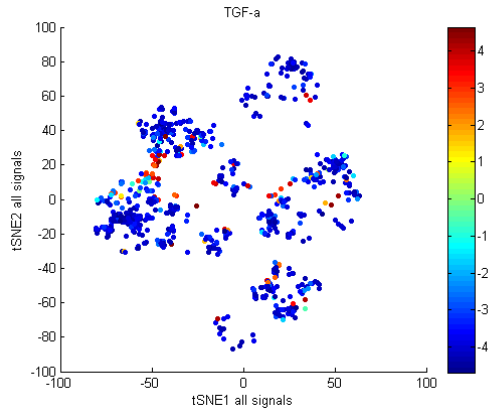

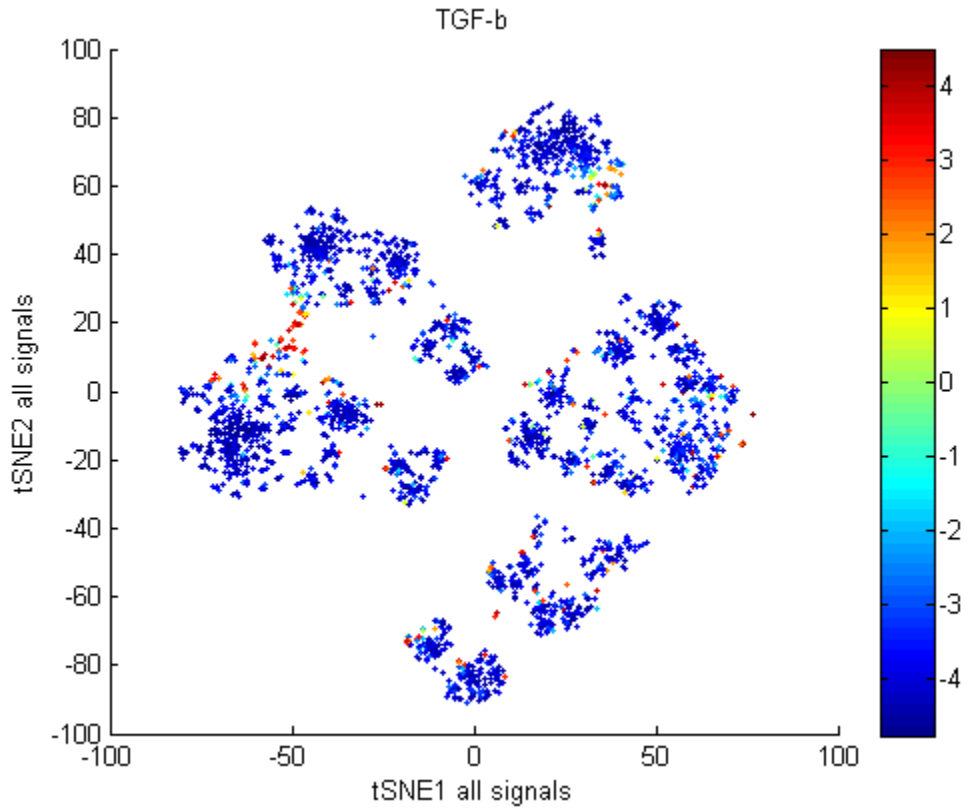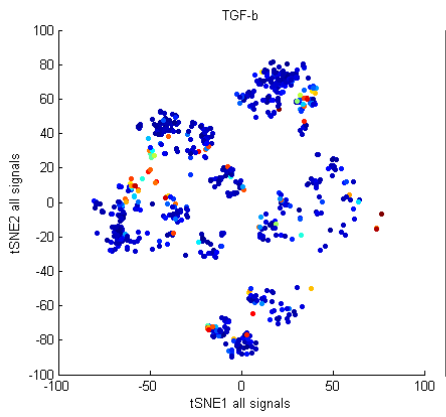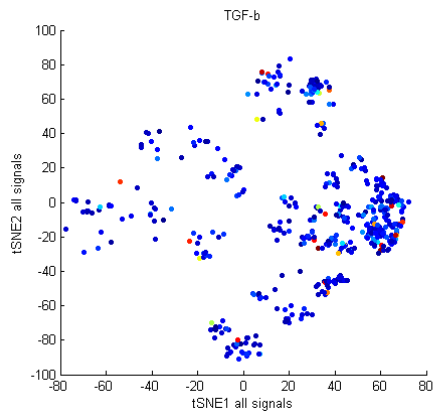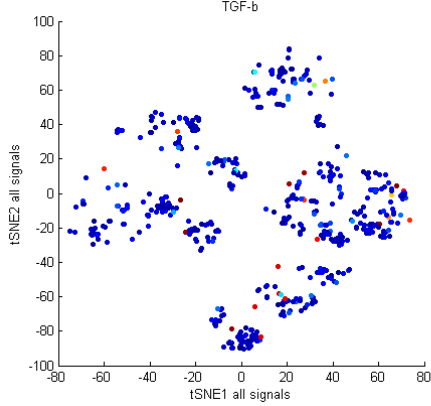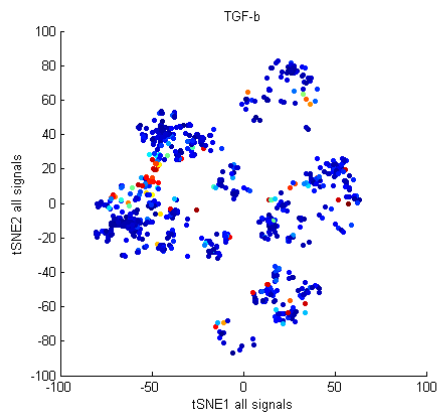

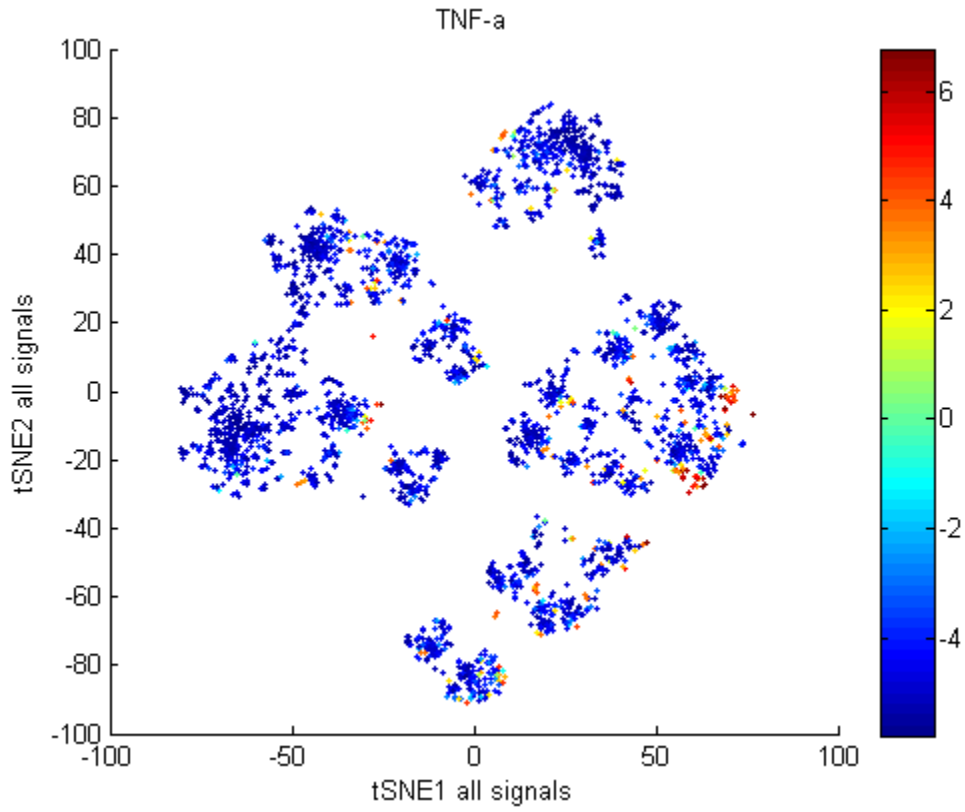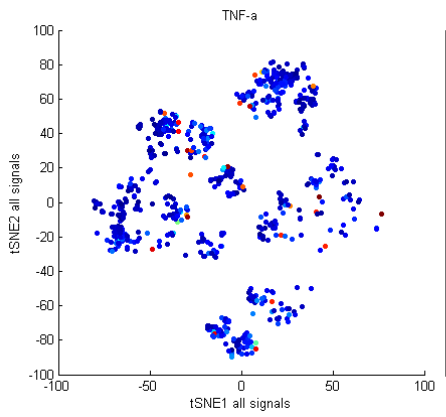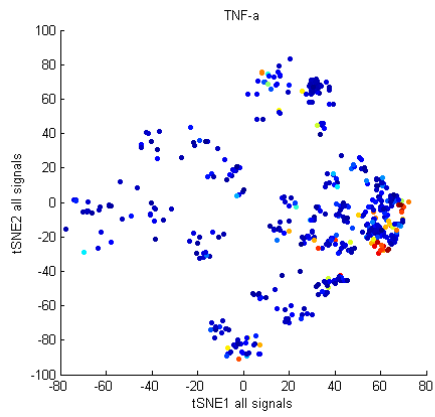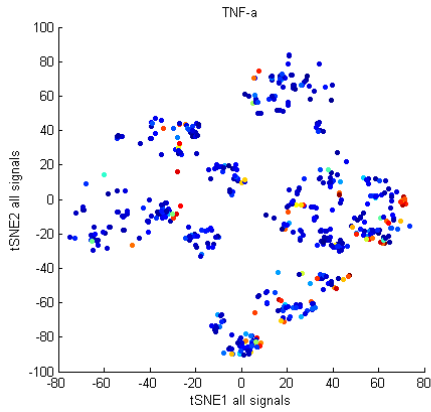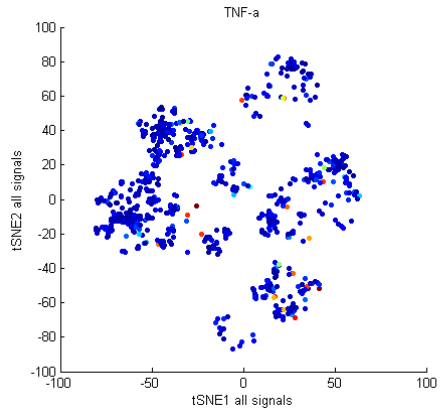

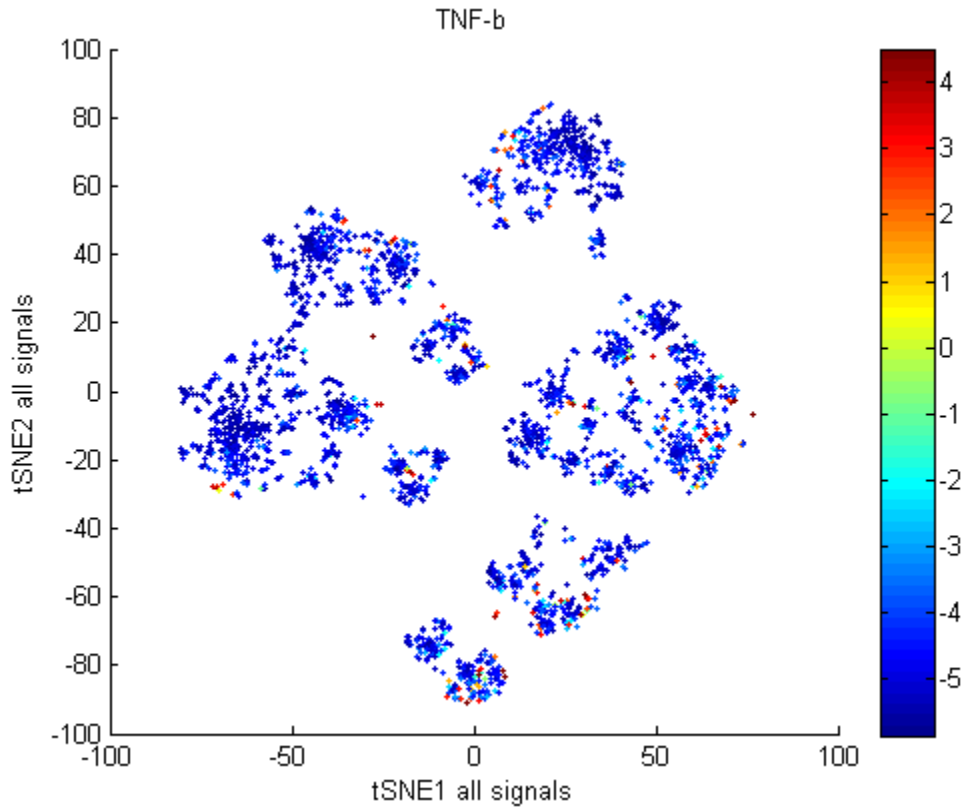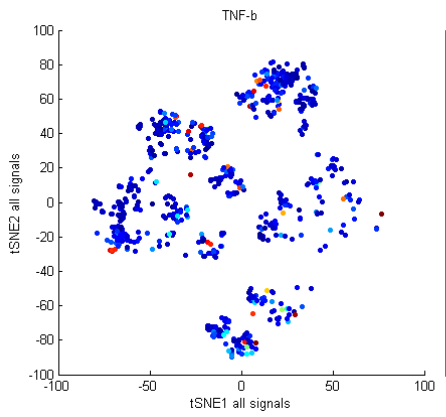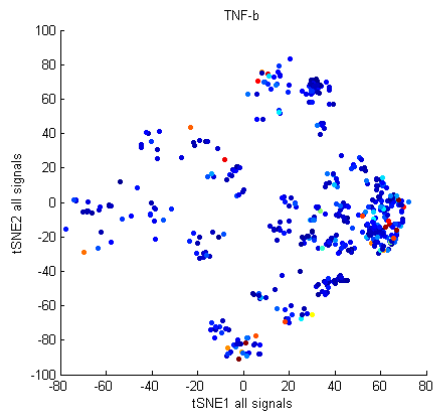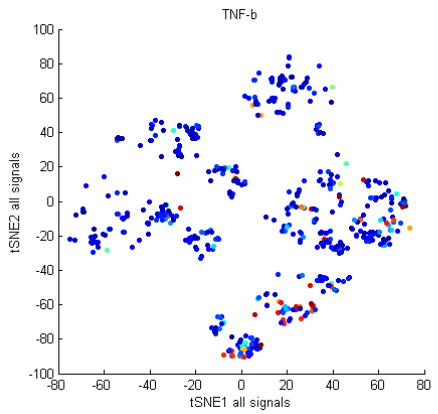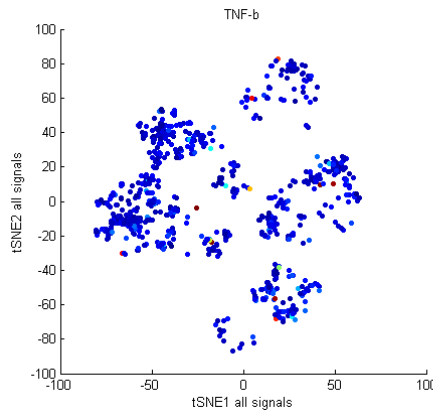



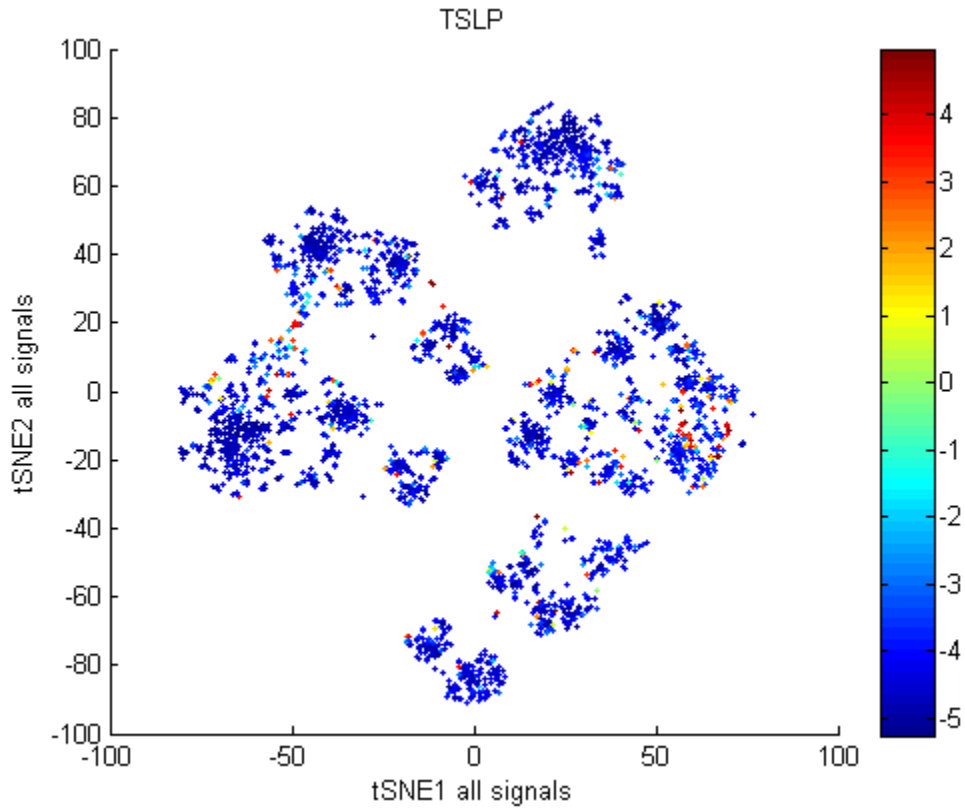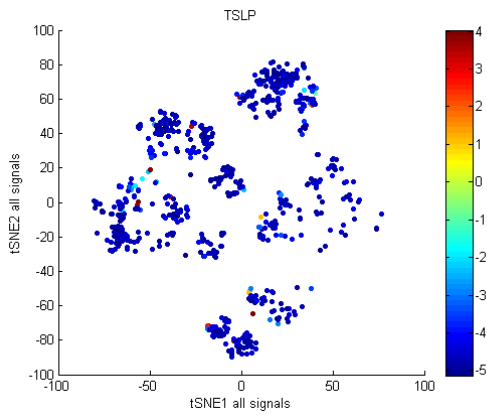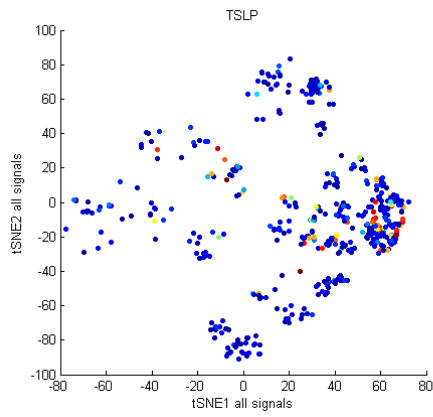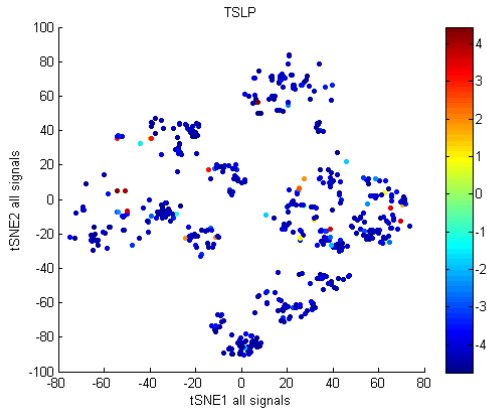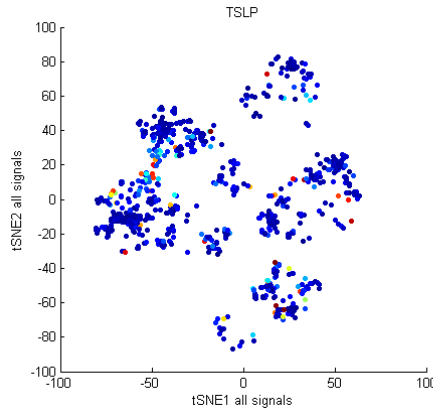

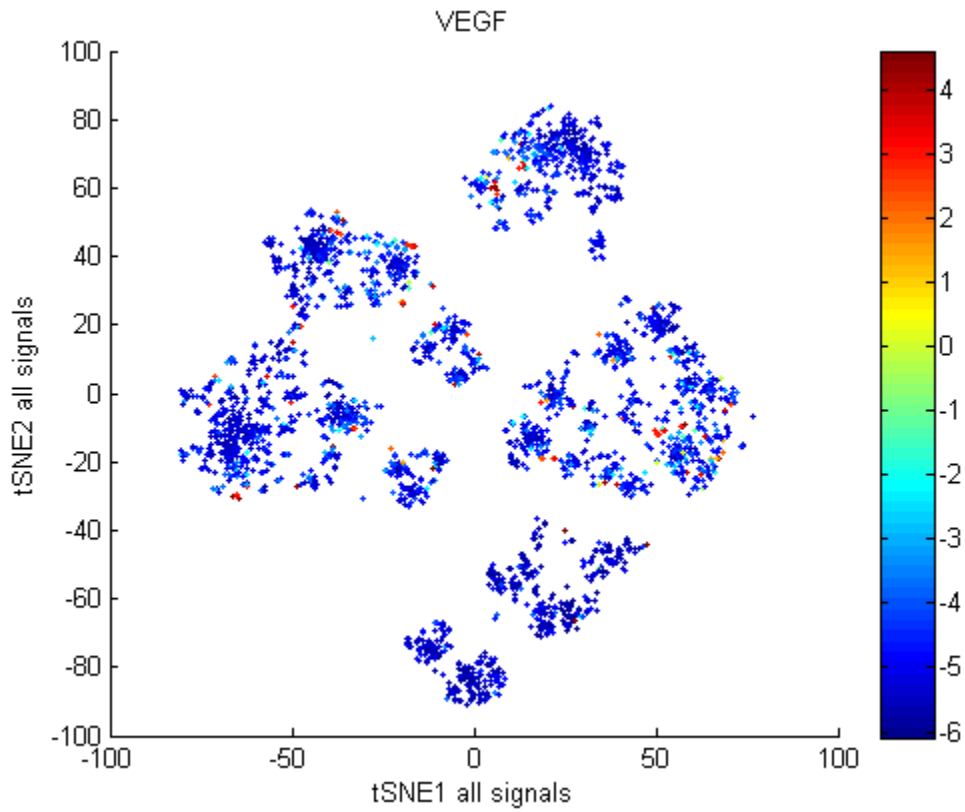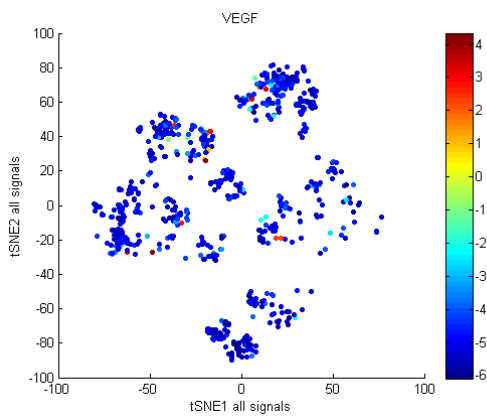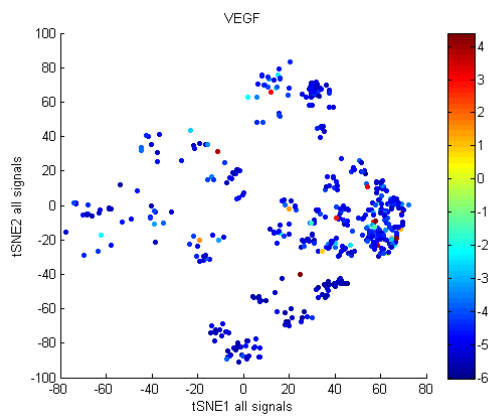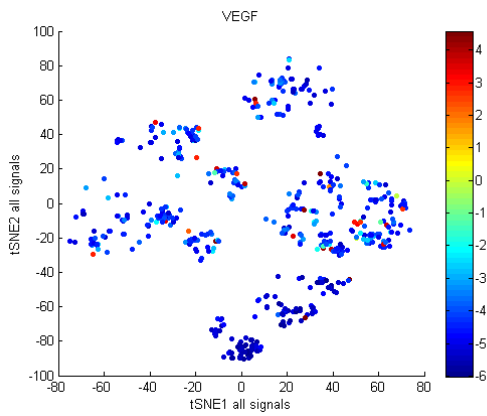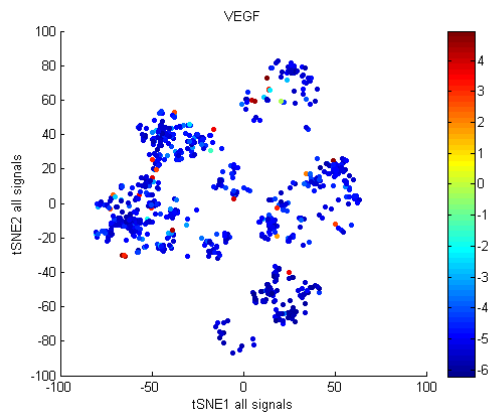

**Fig. S16. Protein distribution in the viSNE maps of U937-derived macrophages at the basal level and stimulated with different TLR ligands.** Cytokine functions in all subpopulations identified by the viSNE analysis for U937 derived macrophage cells under the stimulation of different TLR ligands (basal, TLR4 by LPS, TLR1/2 by PAM3, TLR3 by poly IC). The figures are arranged in the following sequence: combined (top) vs basal (middle left) vs LPS stimulated (middle right) vs PAM3 stimulated (bottom left) vs poly IC stimulated (bottom right).

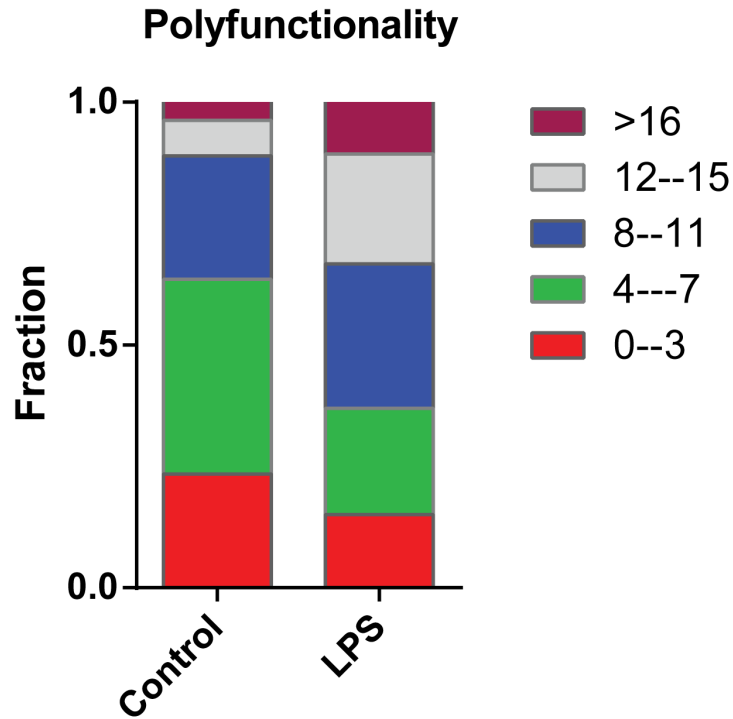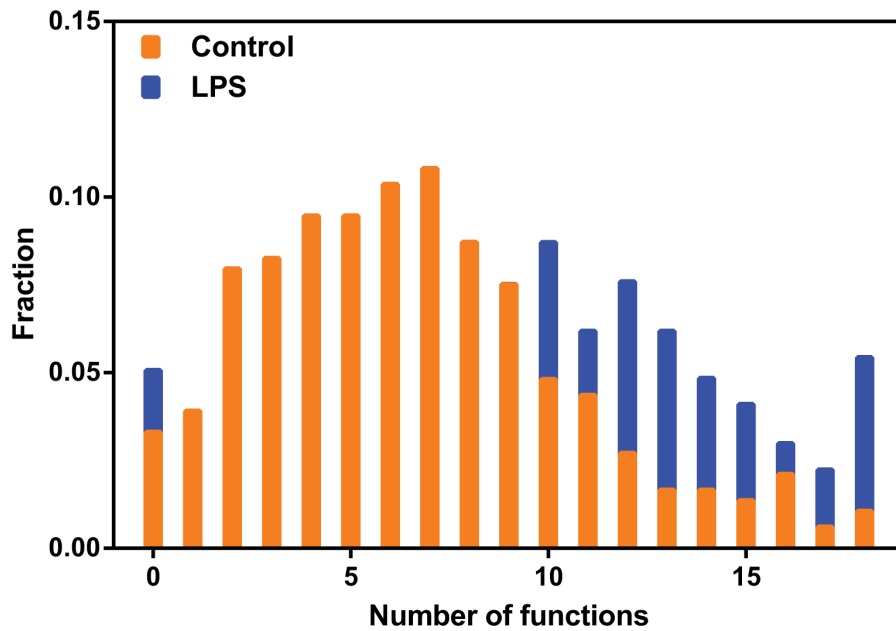

**Fig. S17 Single-cell polyfunctionality in response to LPS stimulation.** It shows poly-functionality analysis of U937 macrophage (control and LPS stimulated), in which a wide variety of single cell poly-functionality was observed and U937 derived macrophage cells showed more poly-functionality upon LPS stimulation.

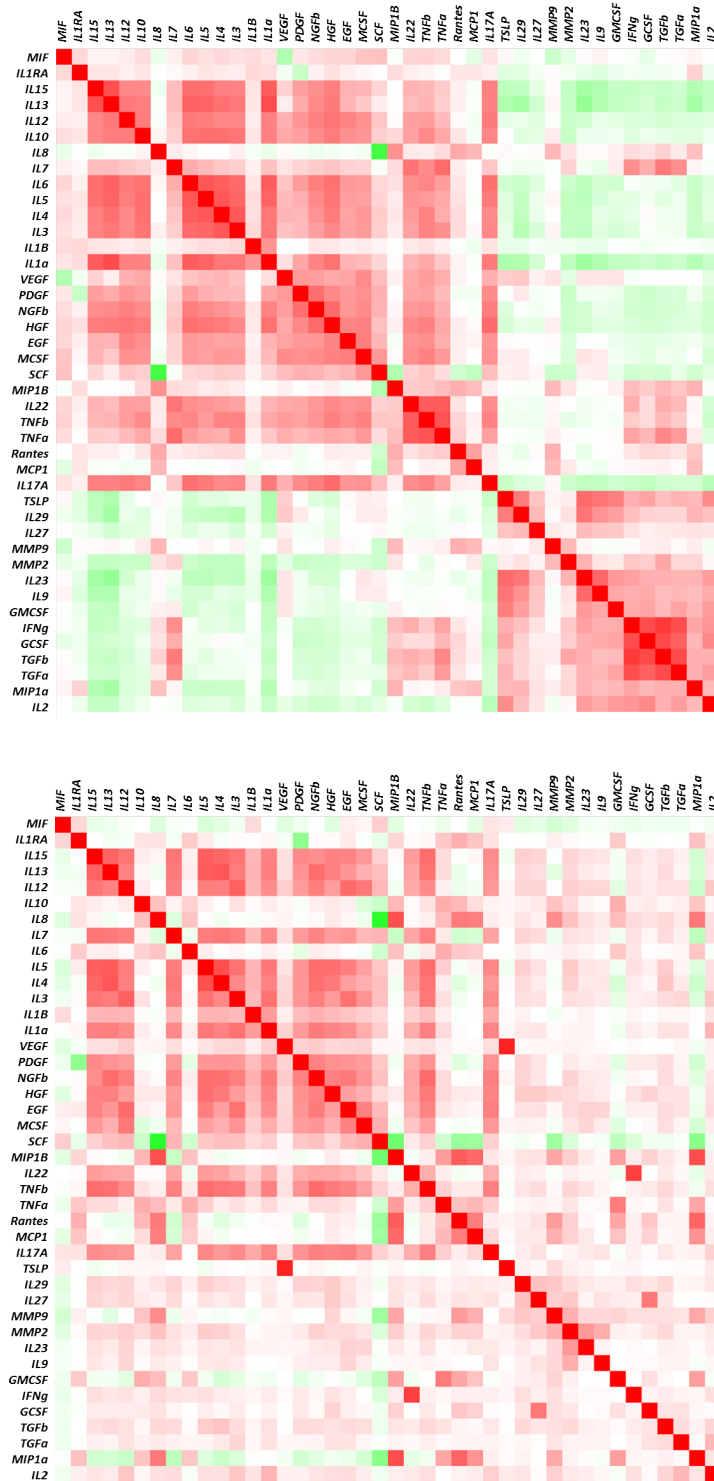

**Figure S18.** Correlation analysis indicates increased co-secretion of multiple cytokines in U937-derived macrophages in response to LPS stimulation. Upper panel: basal cells. Lower panel: LPS stimulated cells.

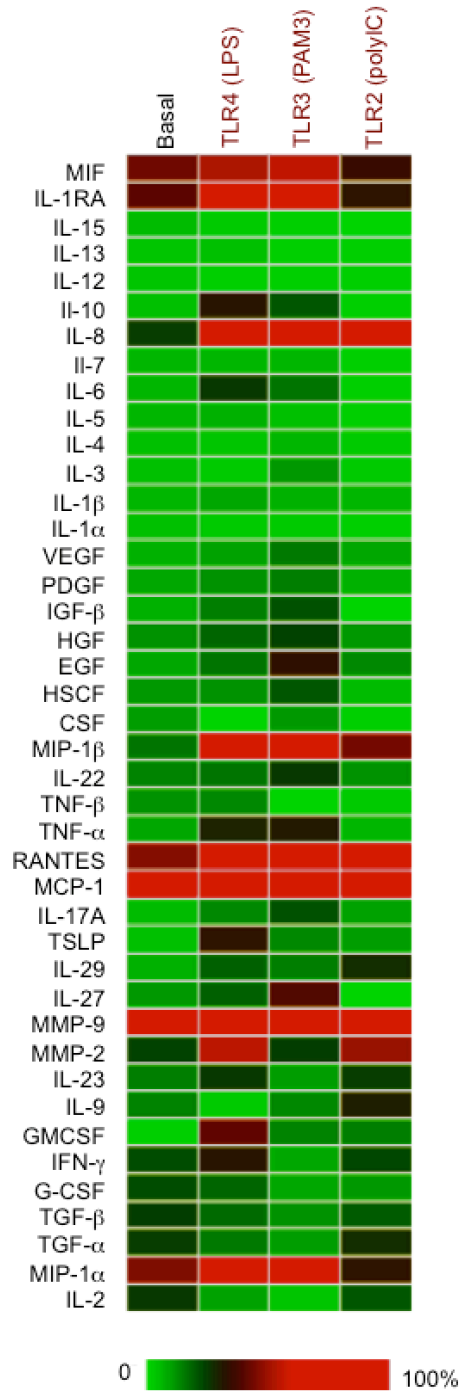

**Fig. S19 Heatmap summarizing the frequency (%) of proteins-secreting cells in the whole population.** U937-derived macrophage cells at the basal level and the cells stimulated by LPS, PAM3 or polyIC were measured for all 42 cytokines. The frequency of cells secreting a given cytokine is shown as the color intensity.

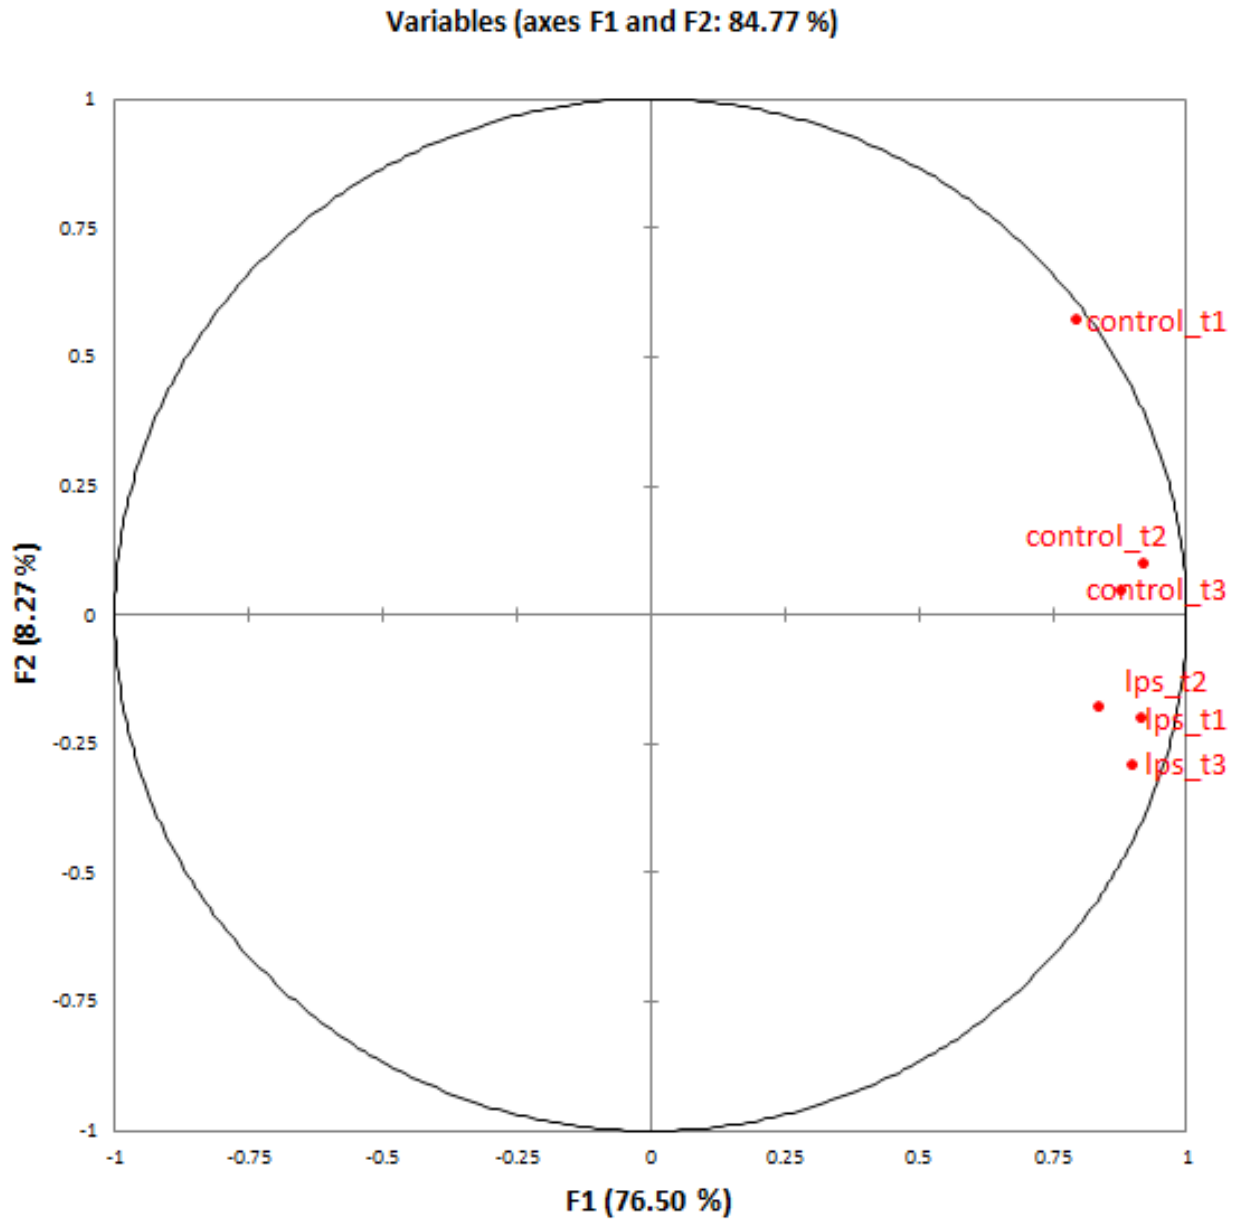

**Fig. S20 Principal Component Analysis of the samples in a triplicate basal vs. LPS treatment experiment.** Six independent single-cell protein secretion experiments were conducted on U937-derived macrophages. Three were measured in the basal condition (control\_t1, 2, and 3) and three were measured on the macrophage cells treated by LPS for 20 hr.

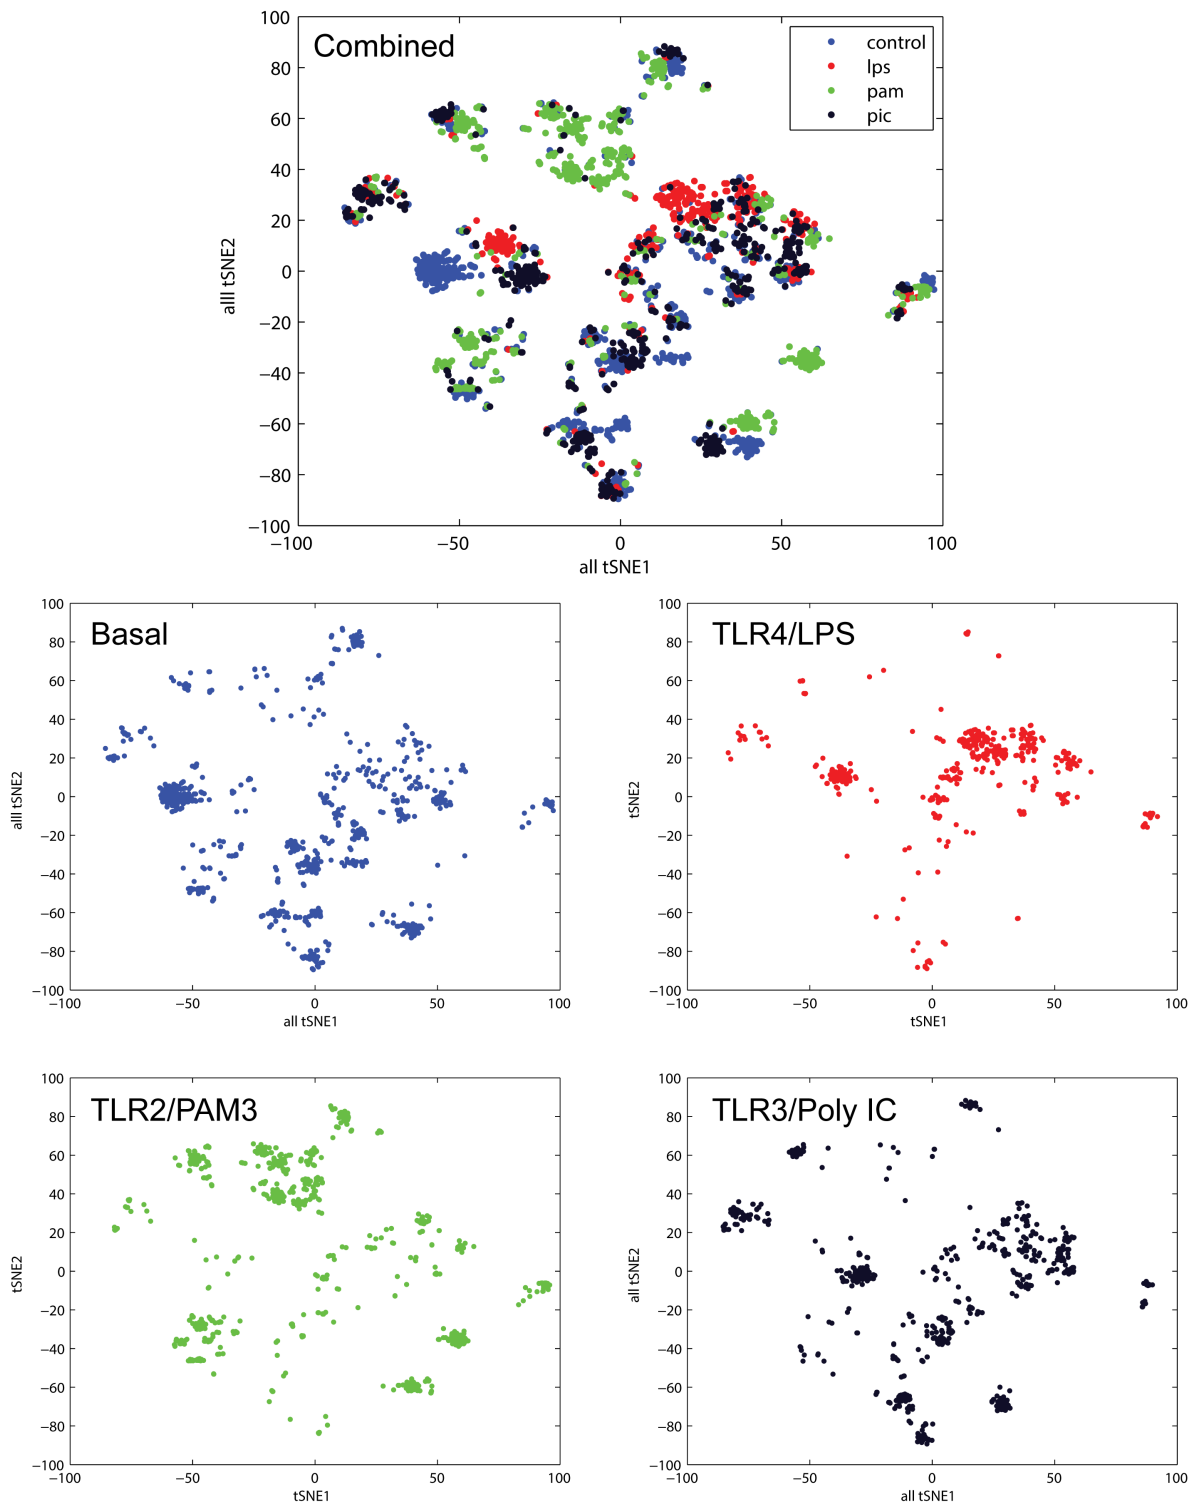

**Fig. S21 viSNE maps for primary macrophage cells derived from a healthy donor.** viSNE structure maps showing primary macrophage under the stimulation of different TLR ligands(basal, TLR4 by LPS, TLR2 by PAM3, TLR3 by poly IC).



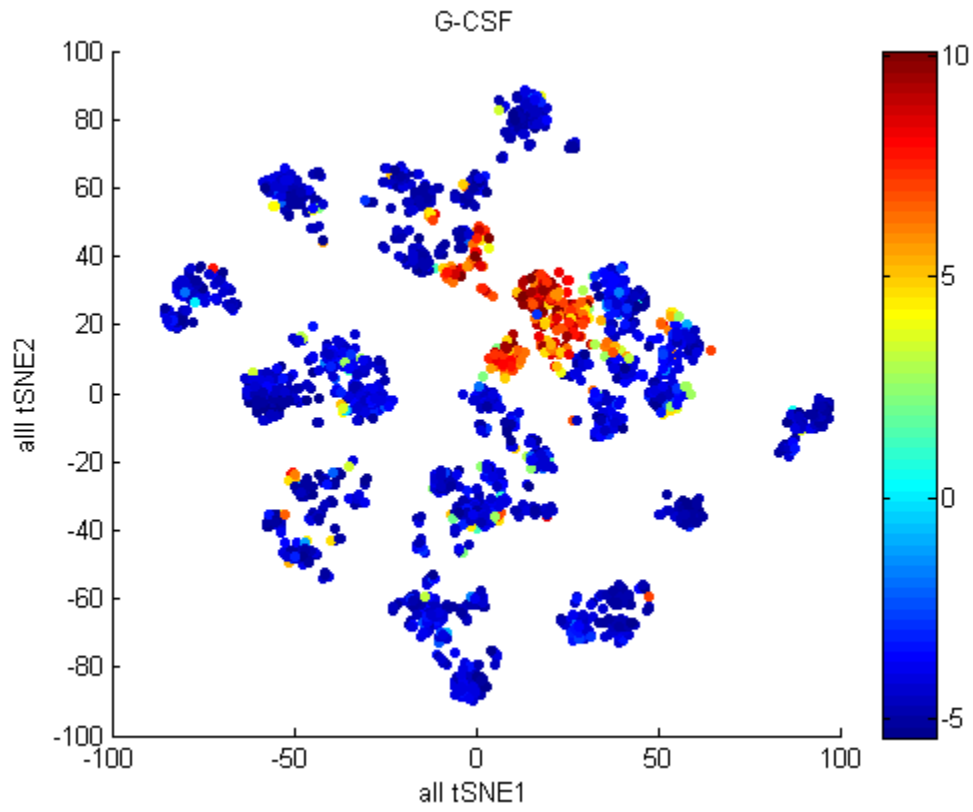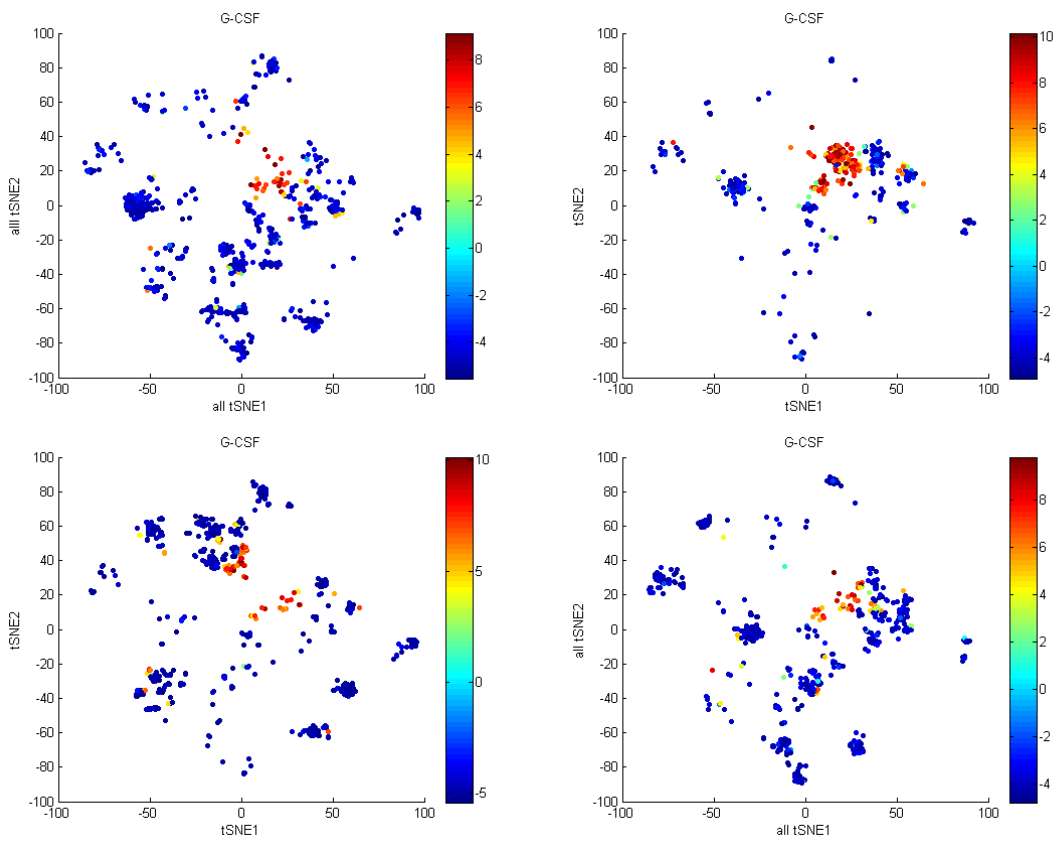

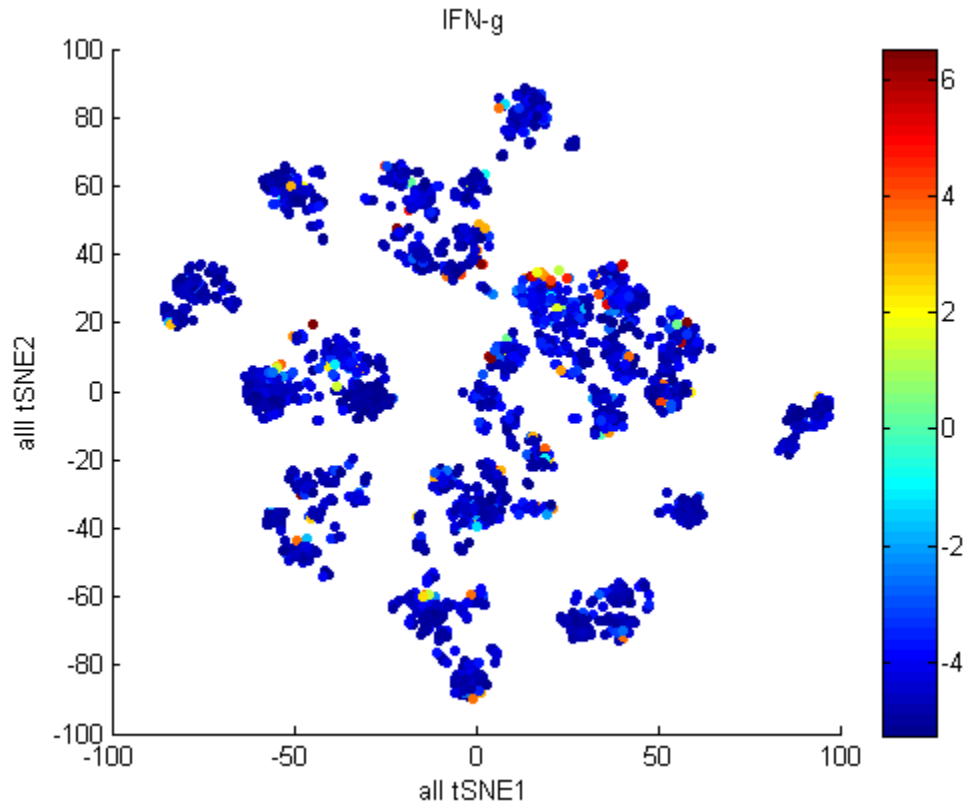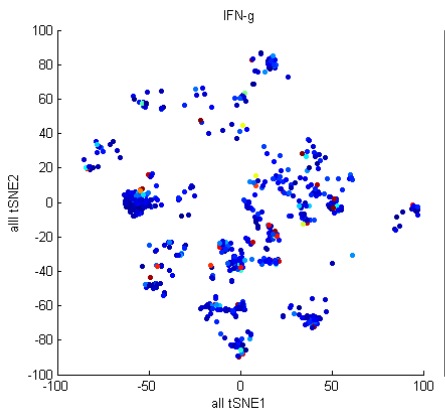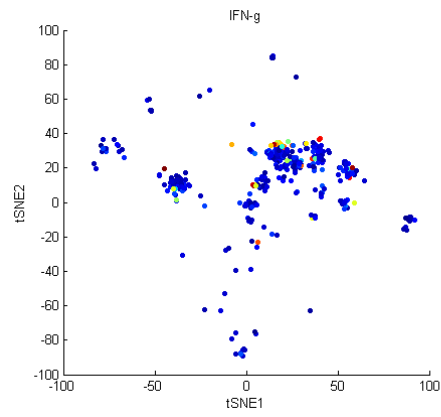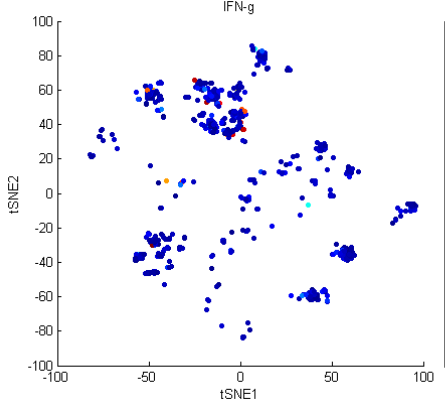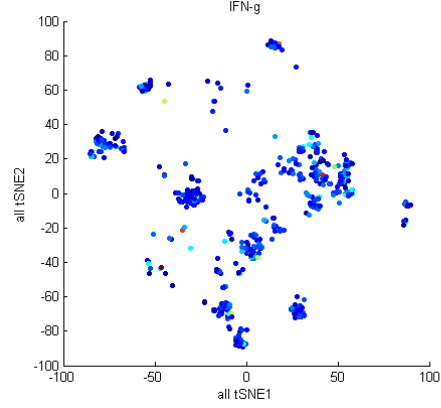

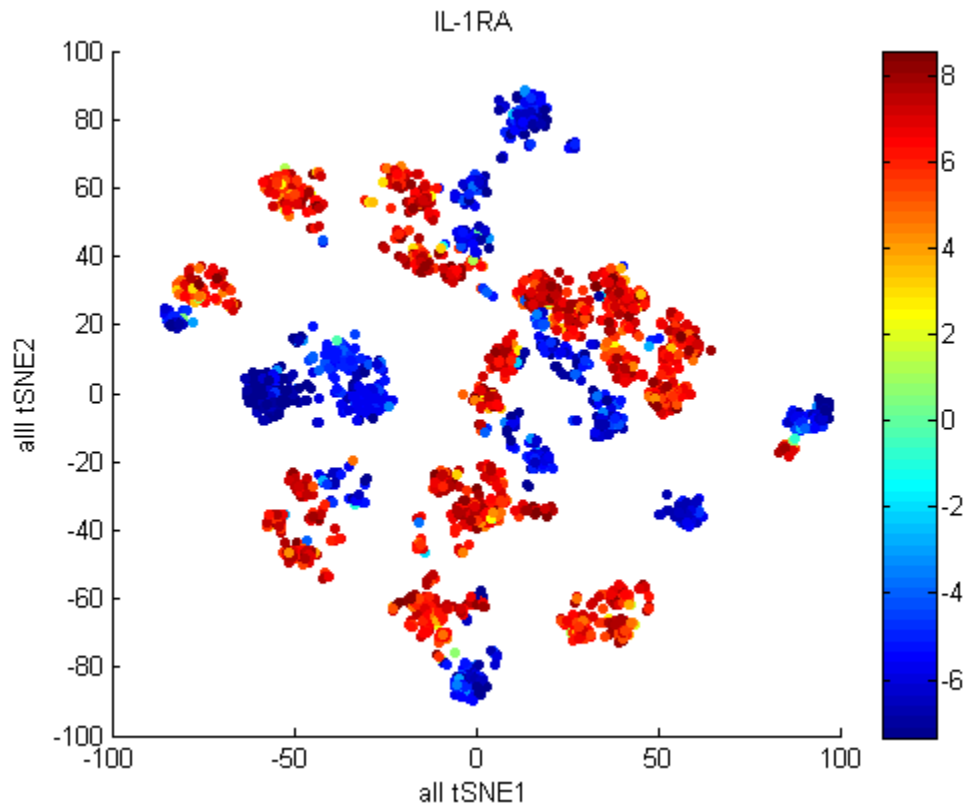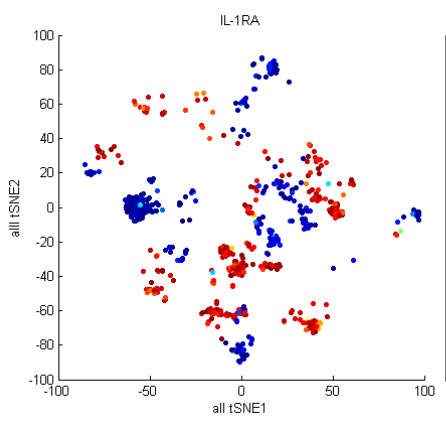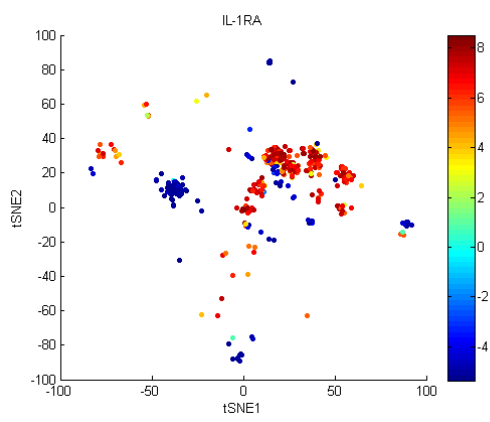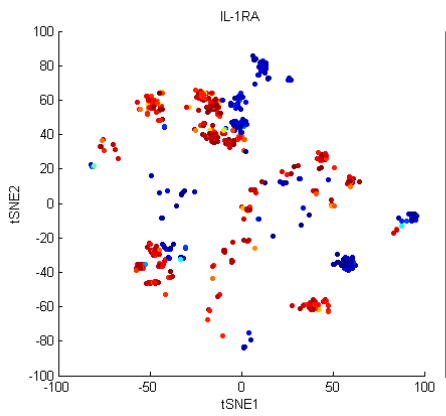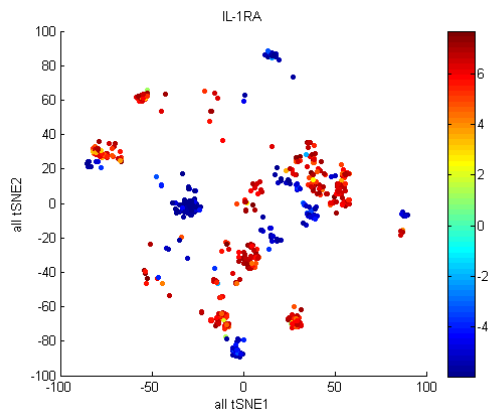

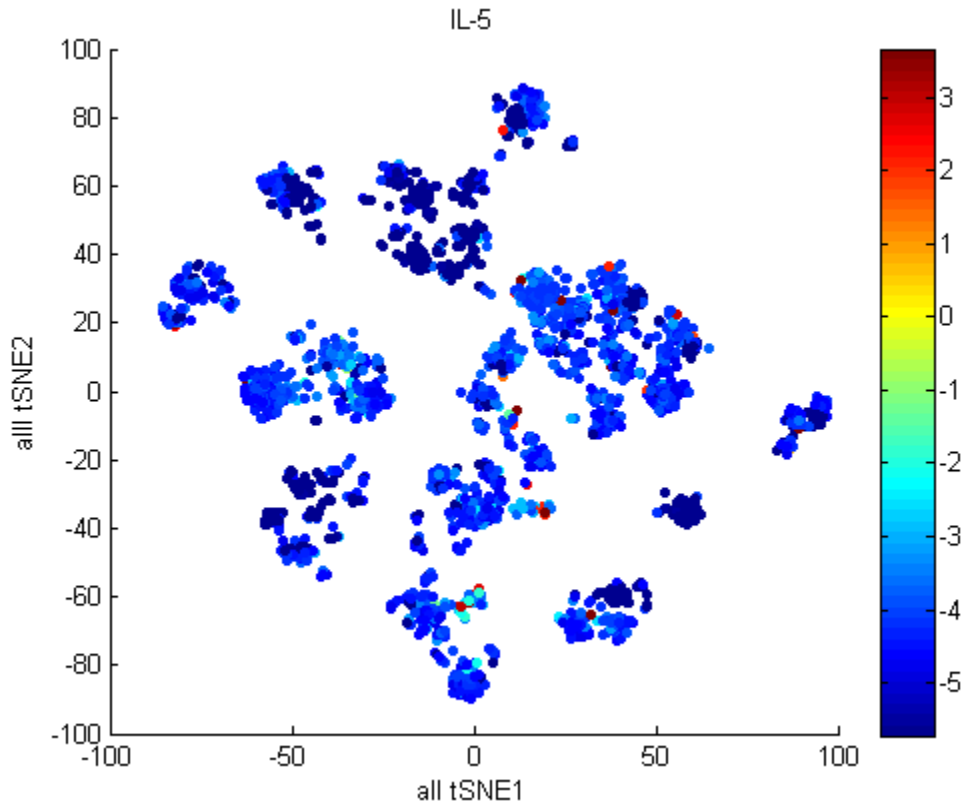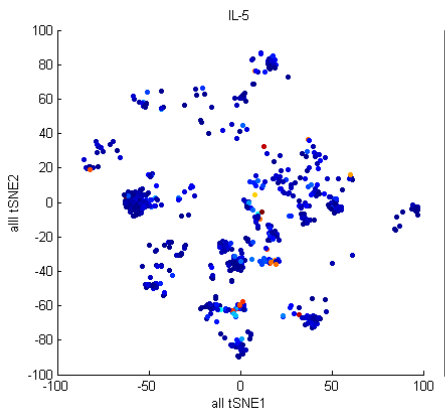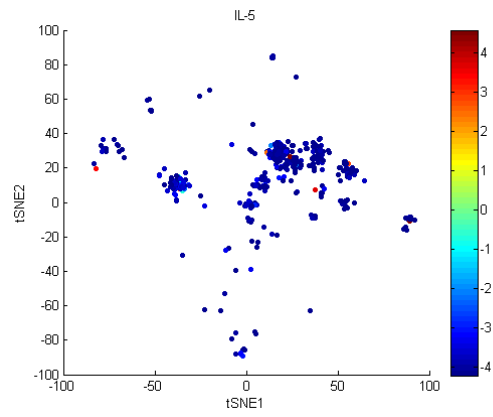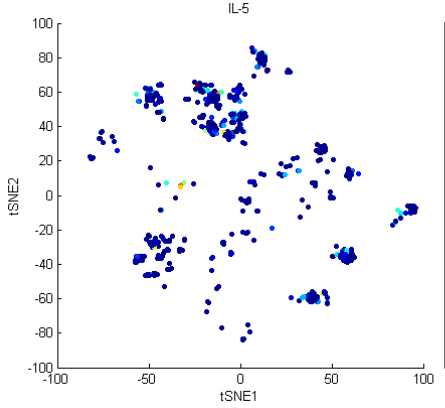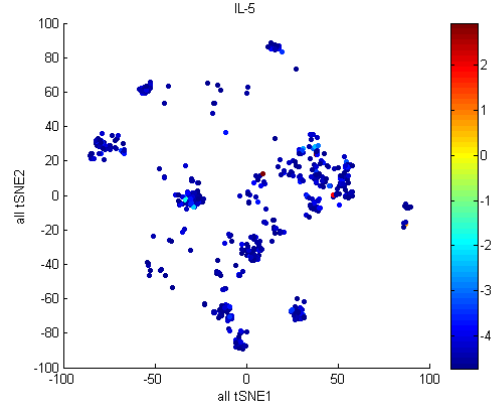

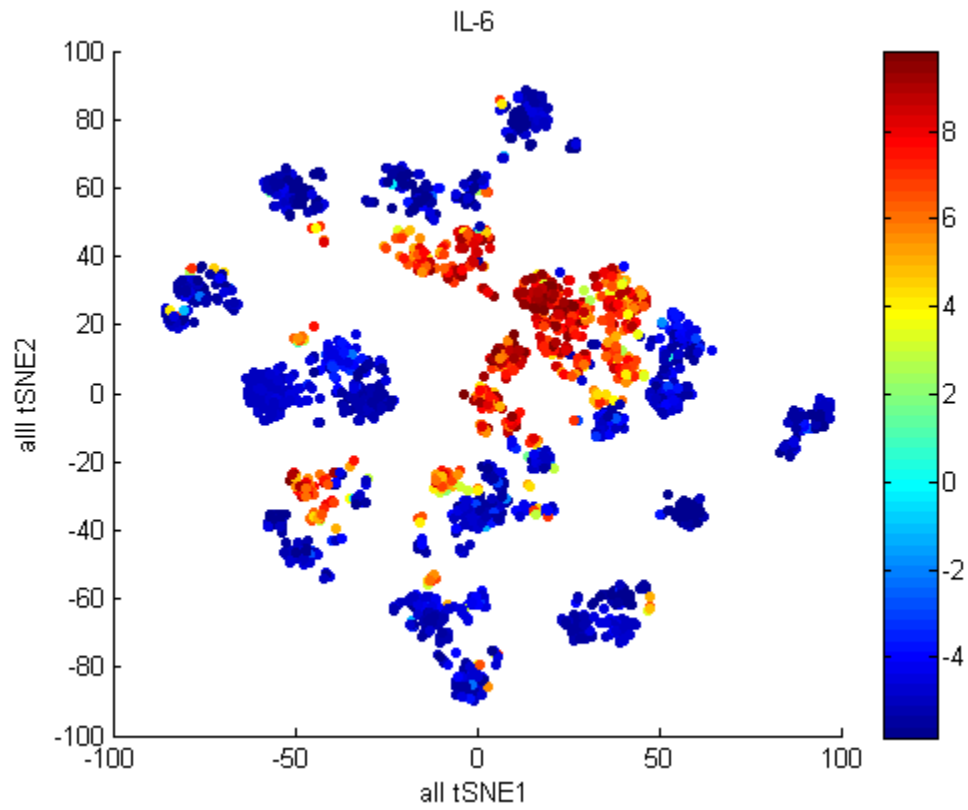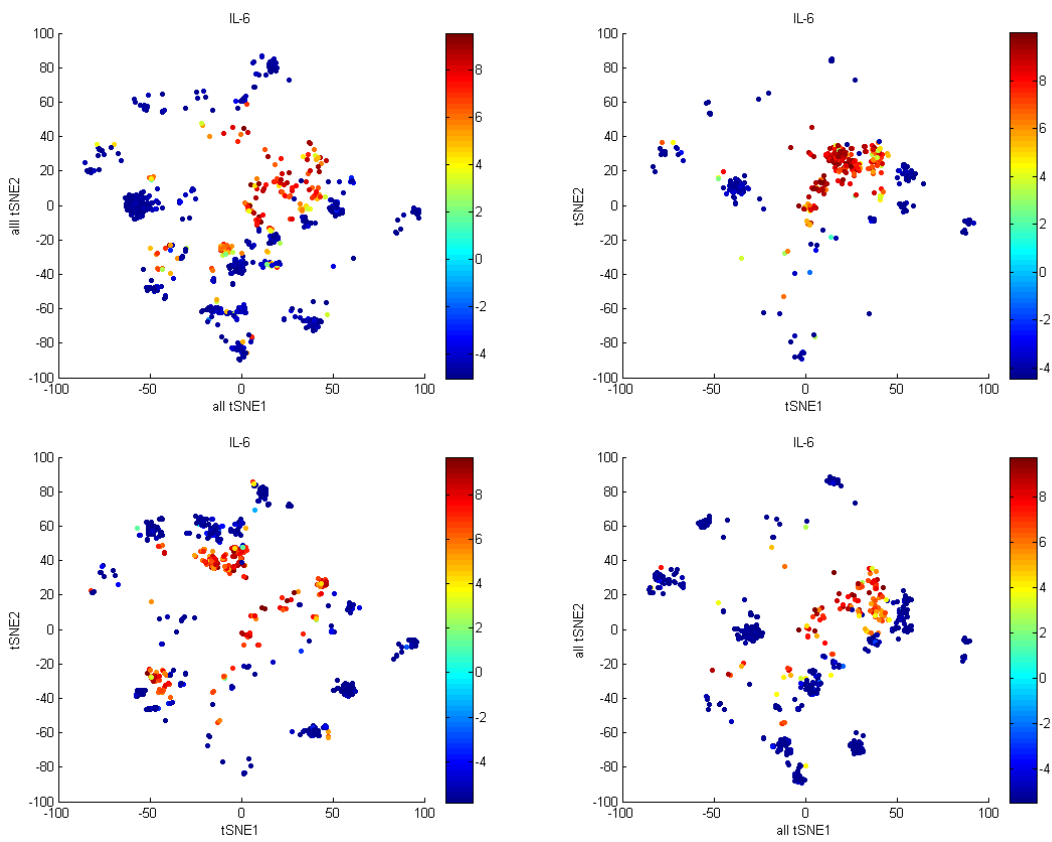

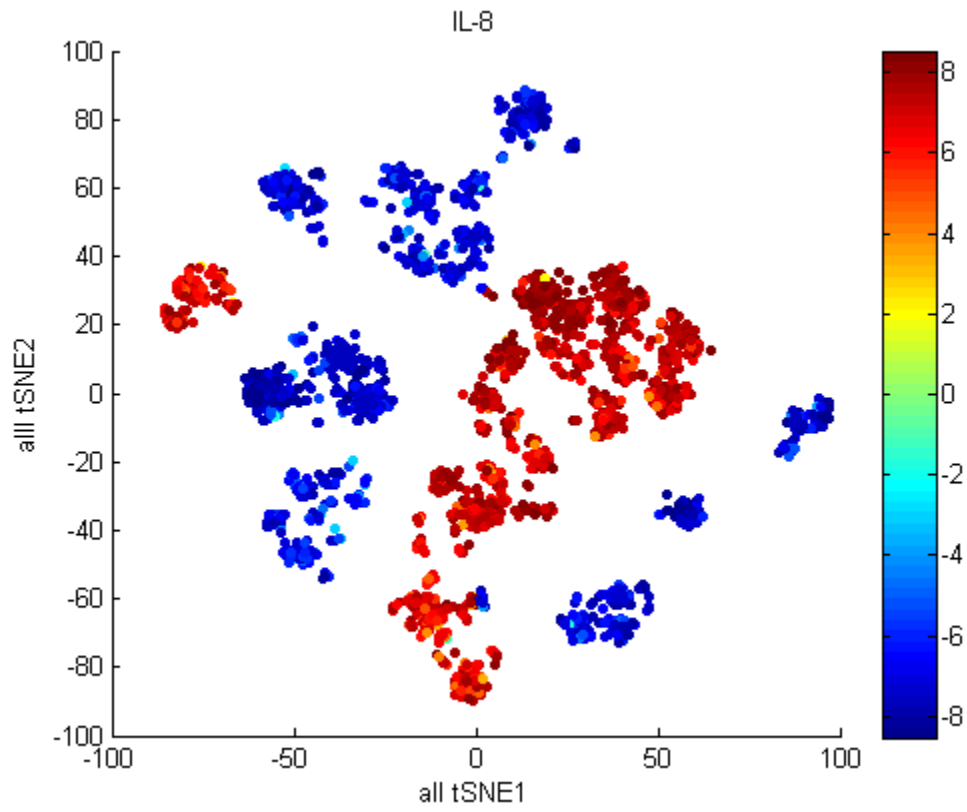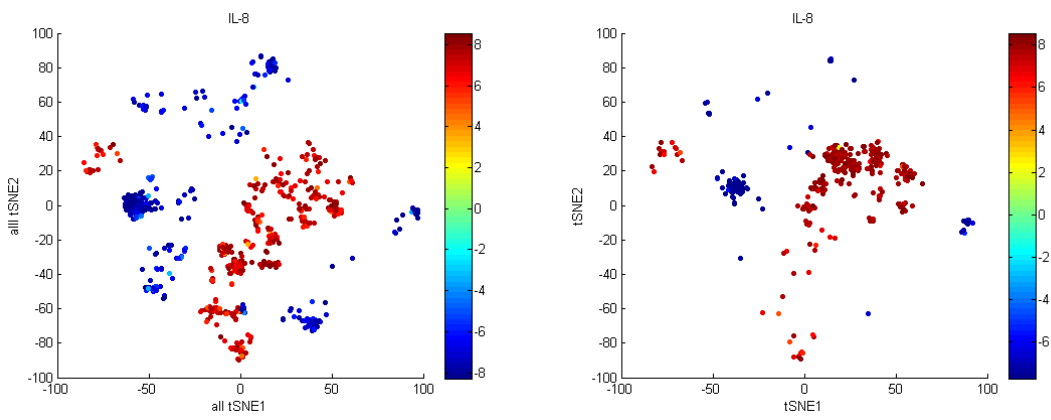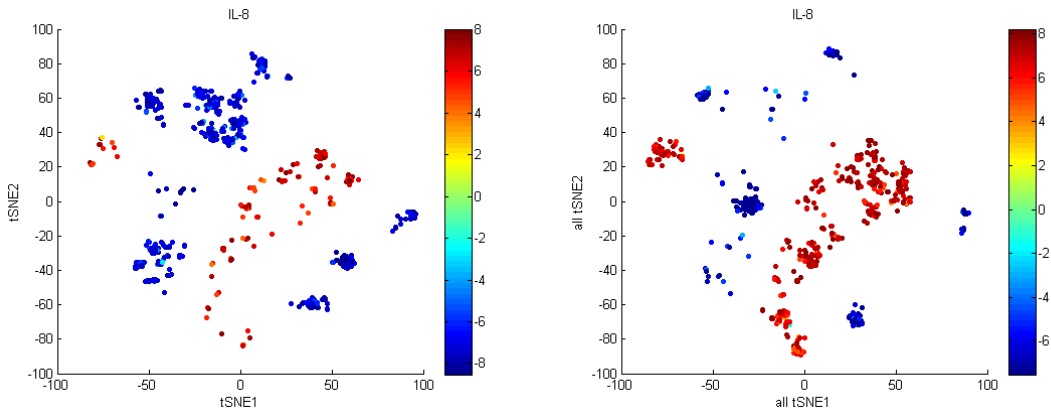

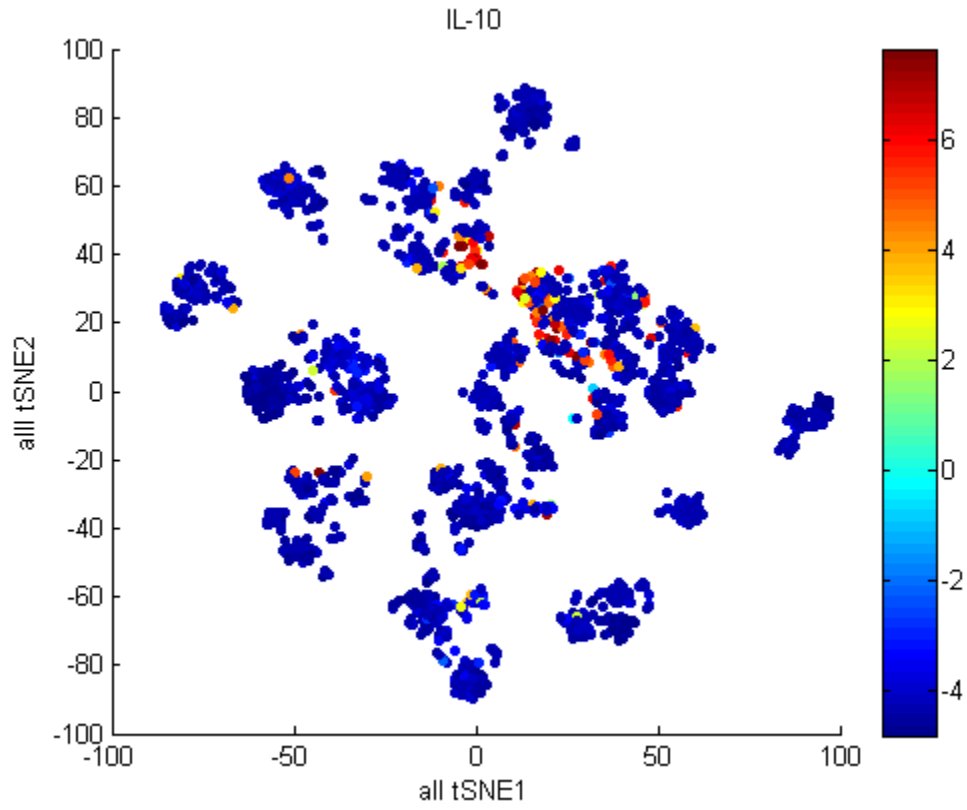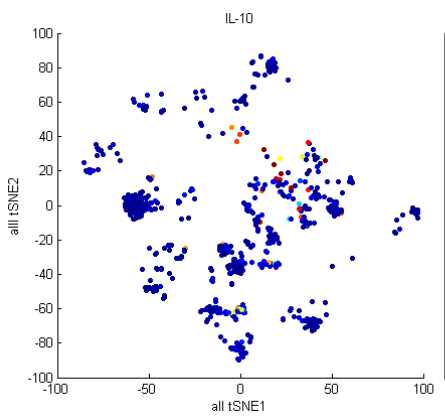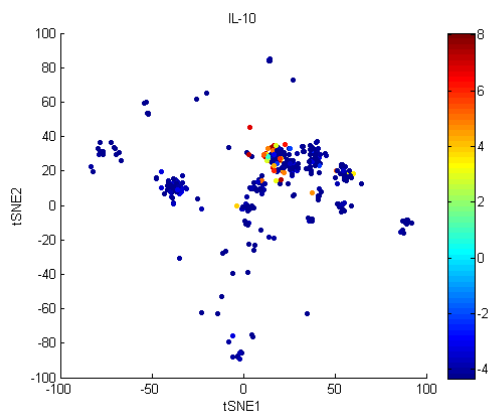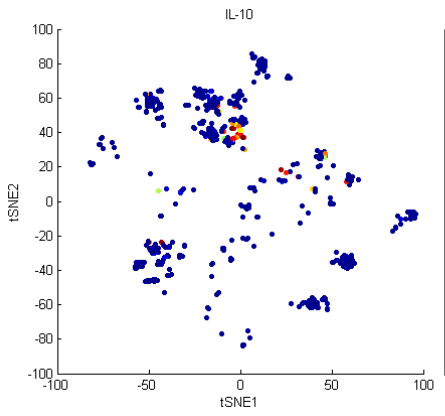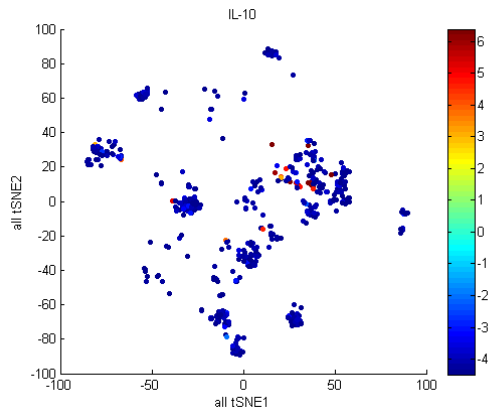

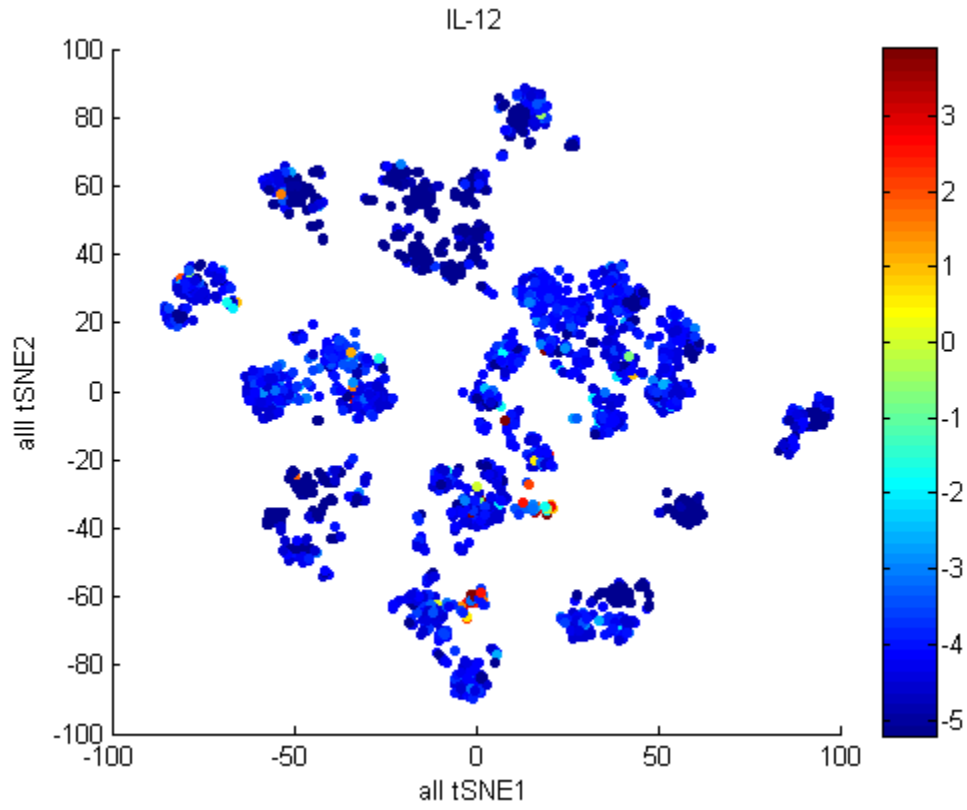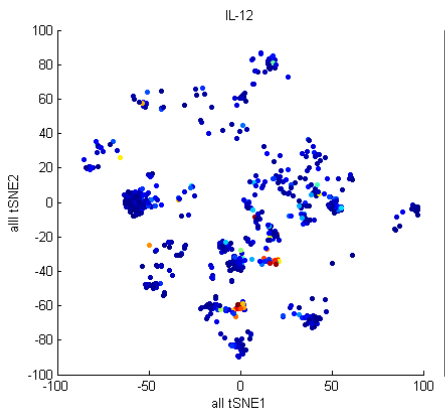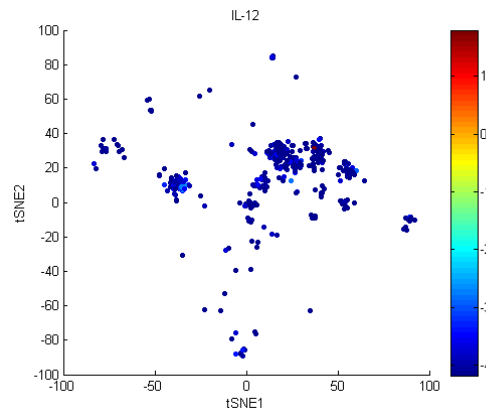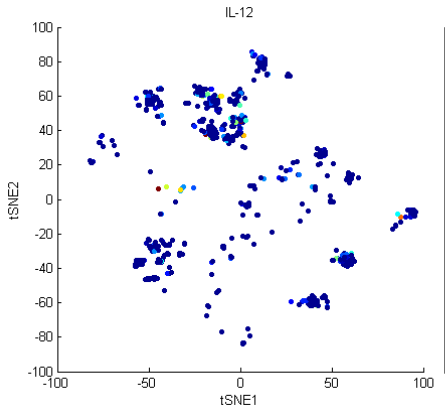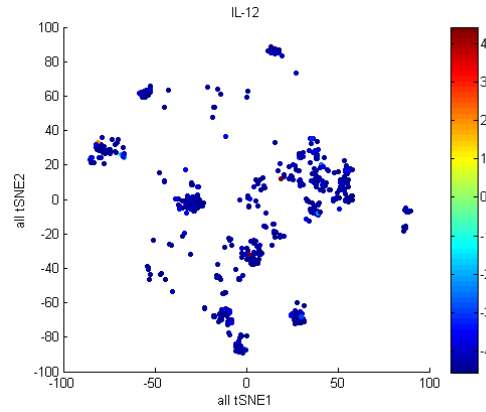



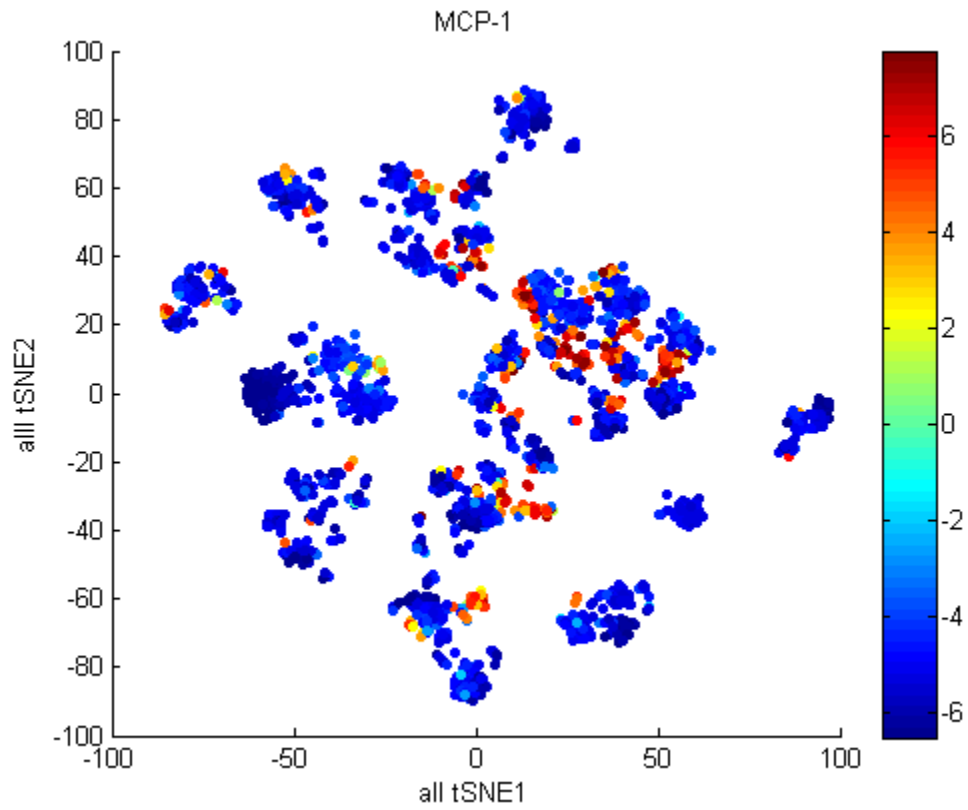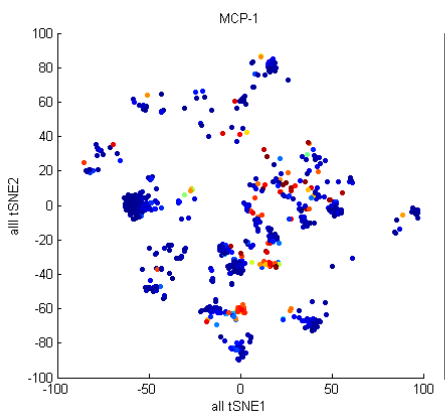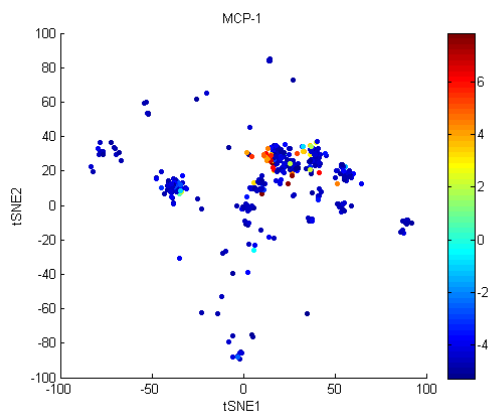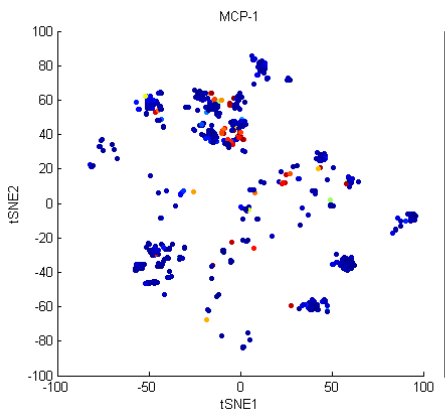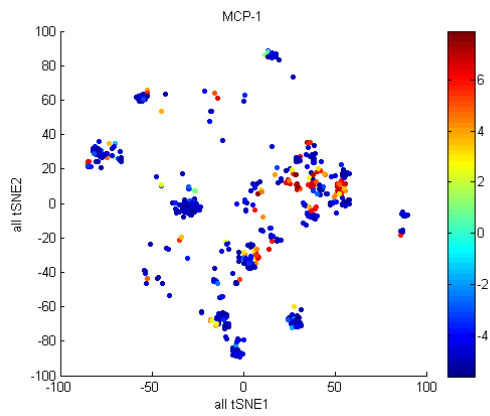

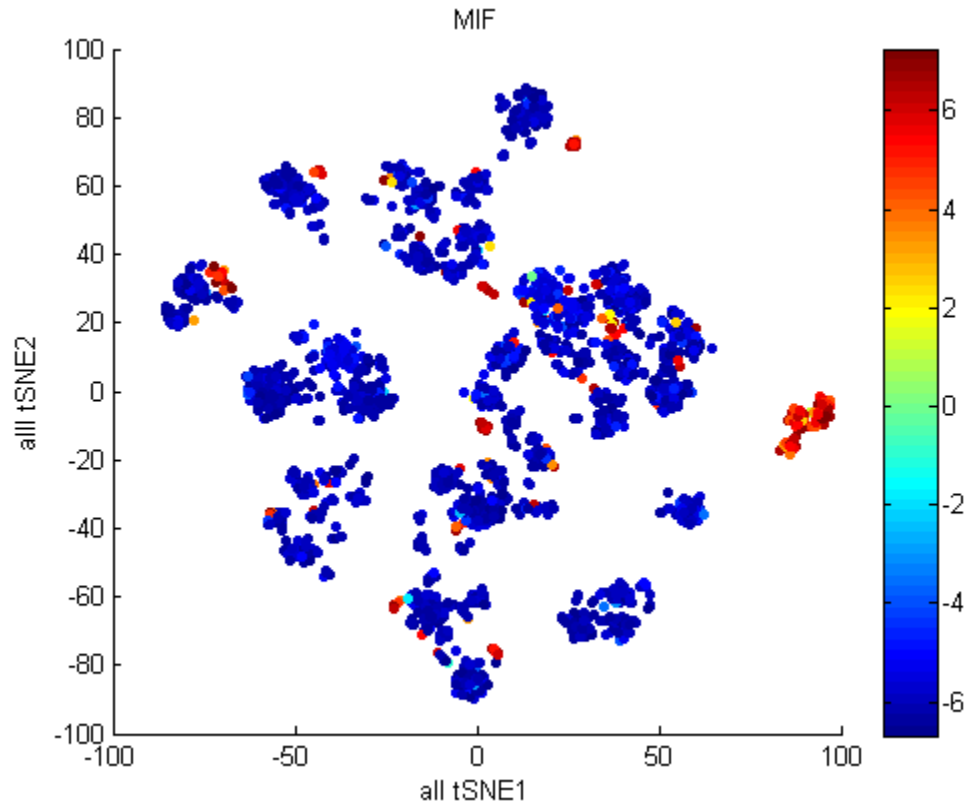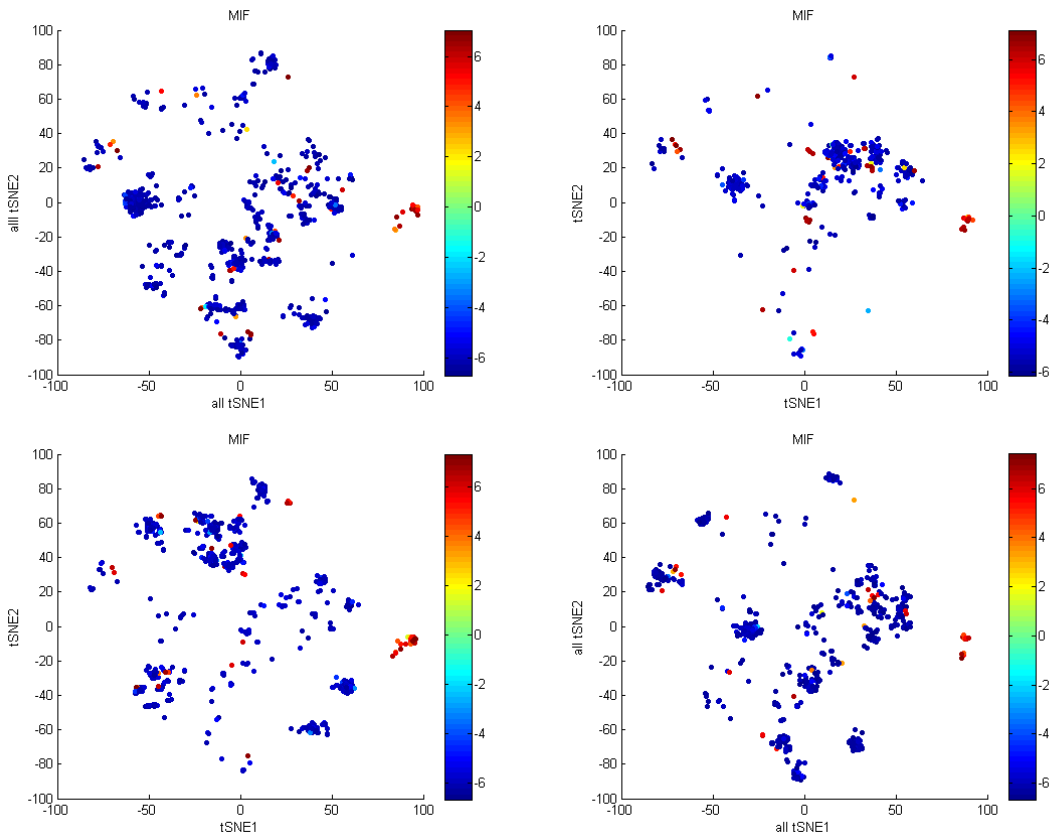

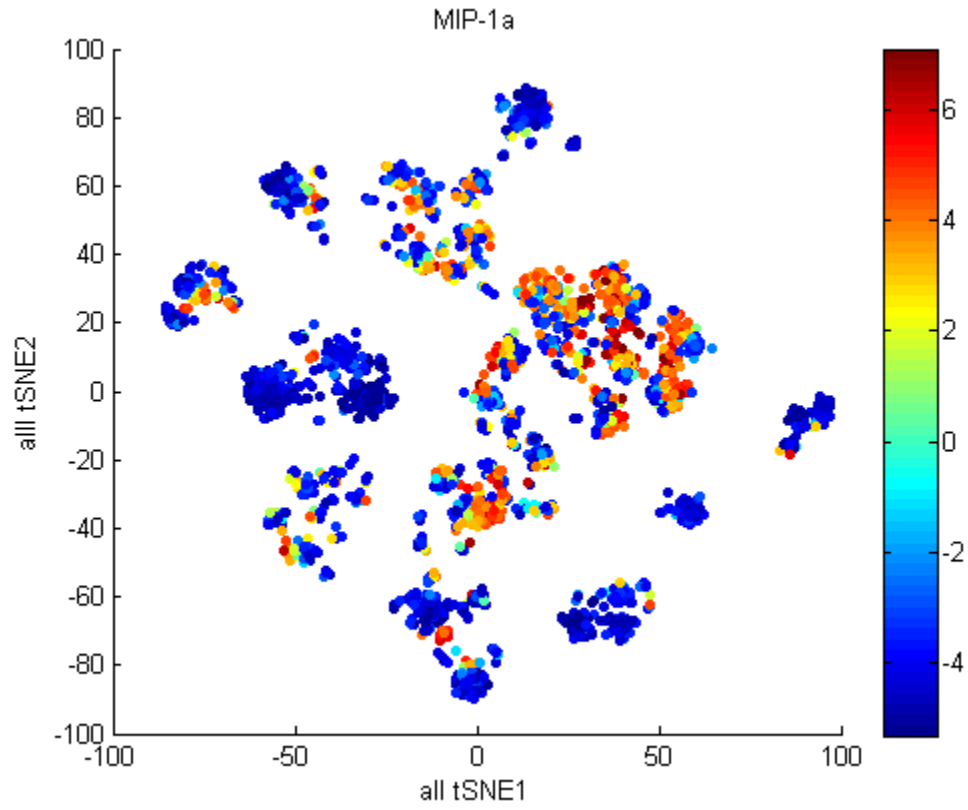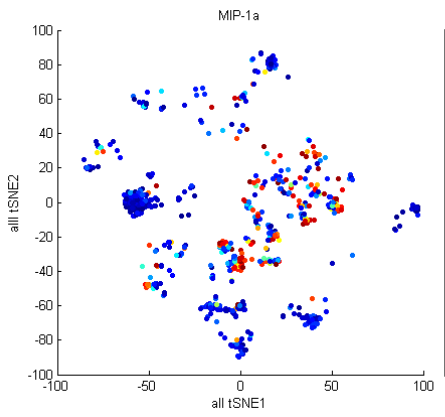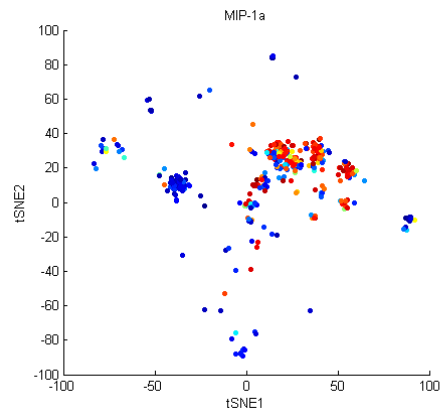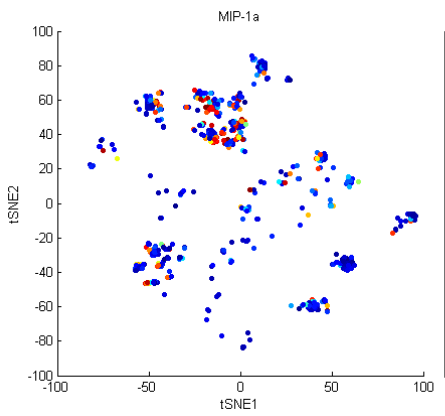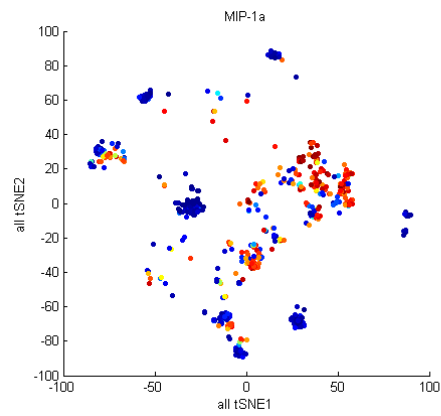

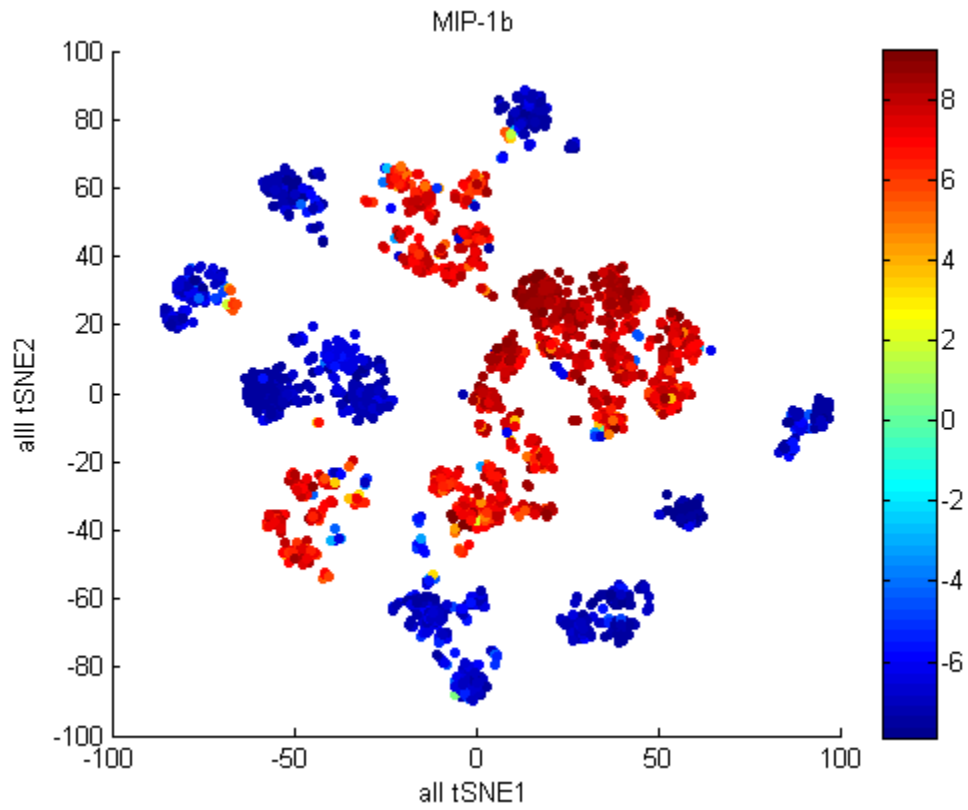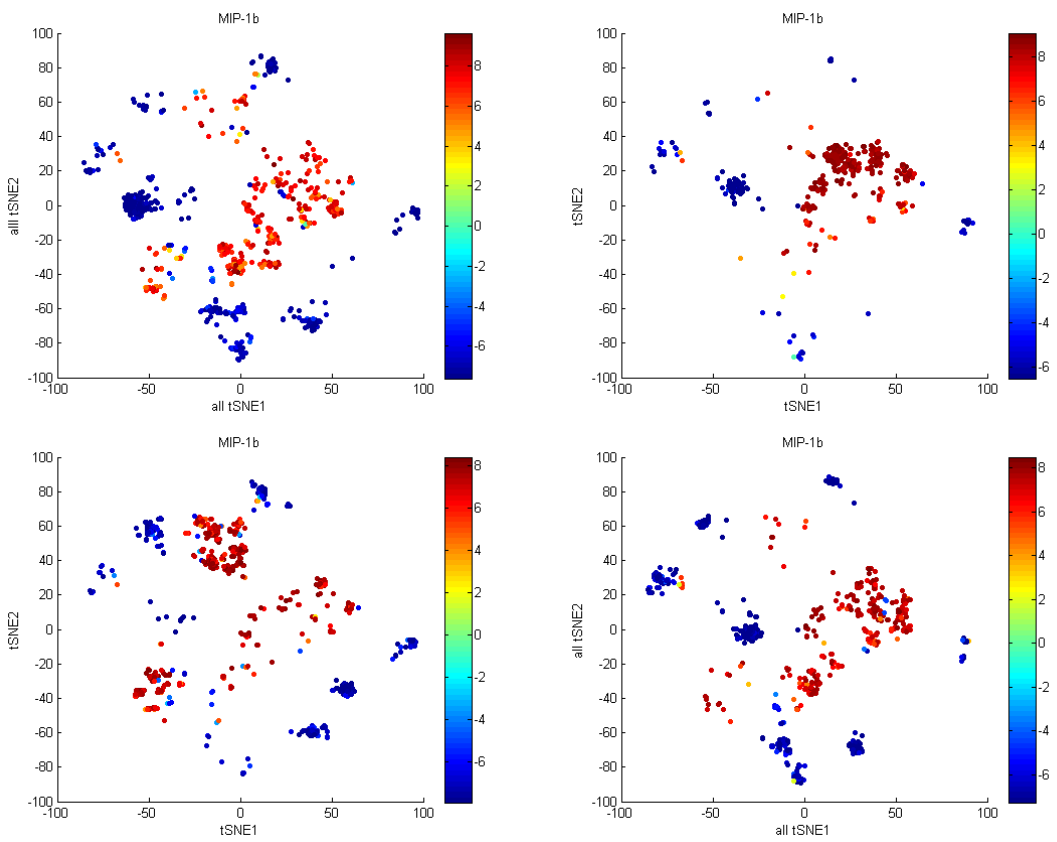

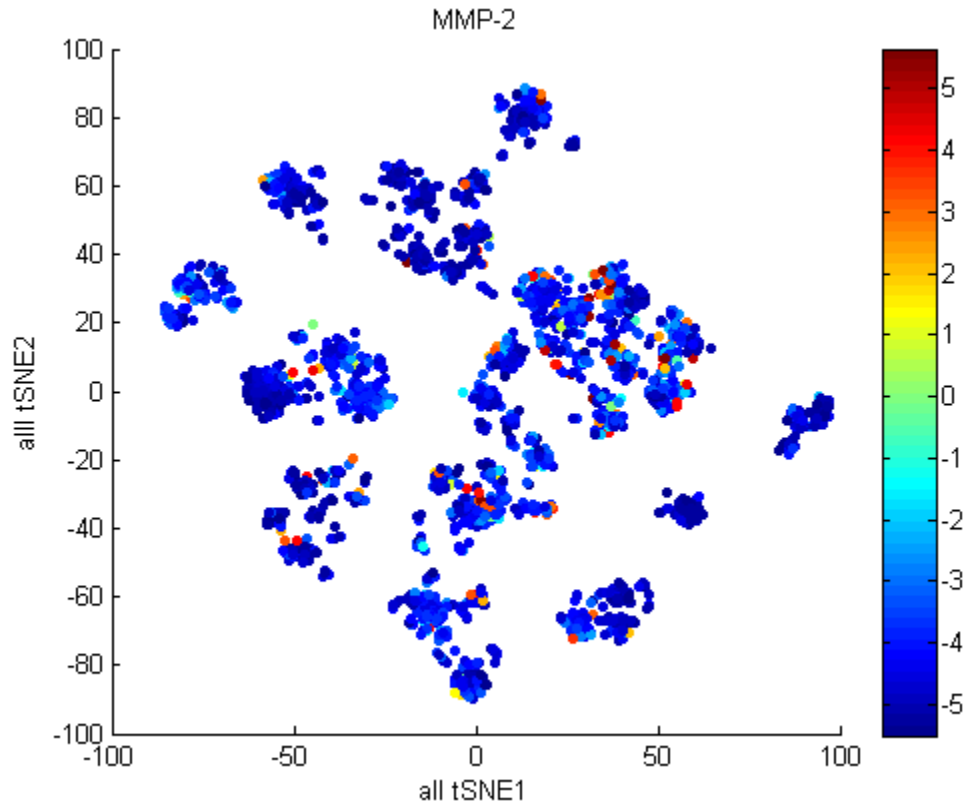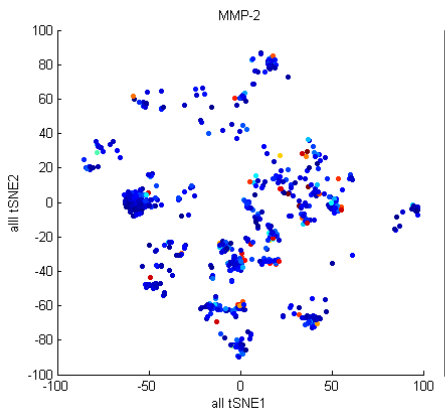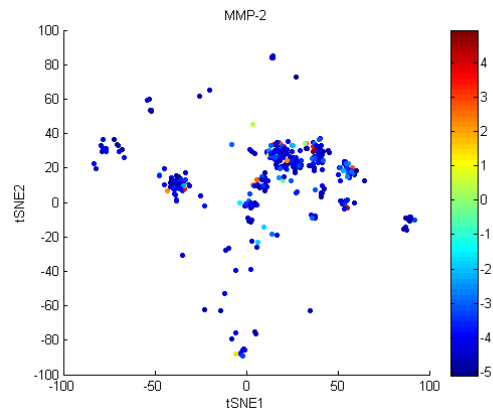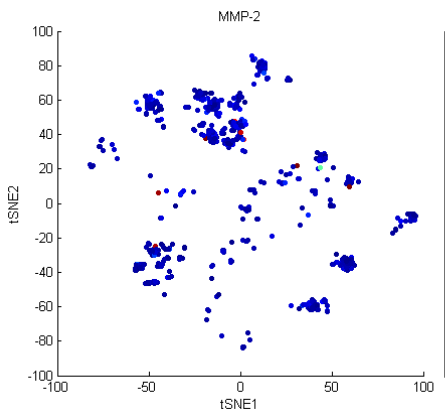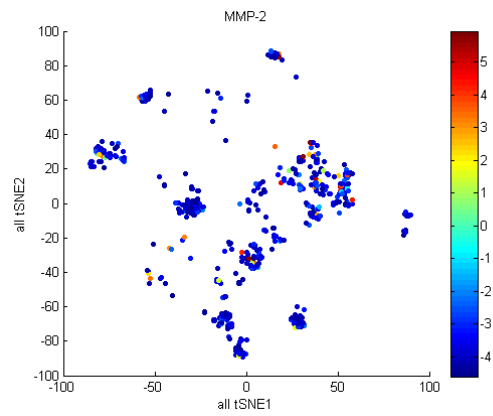

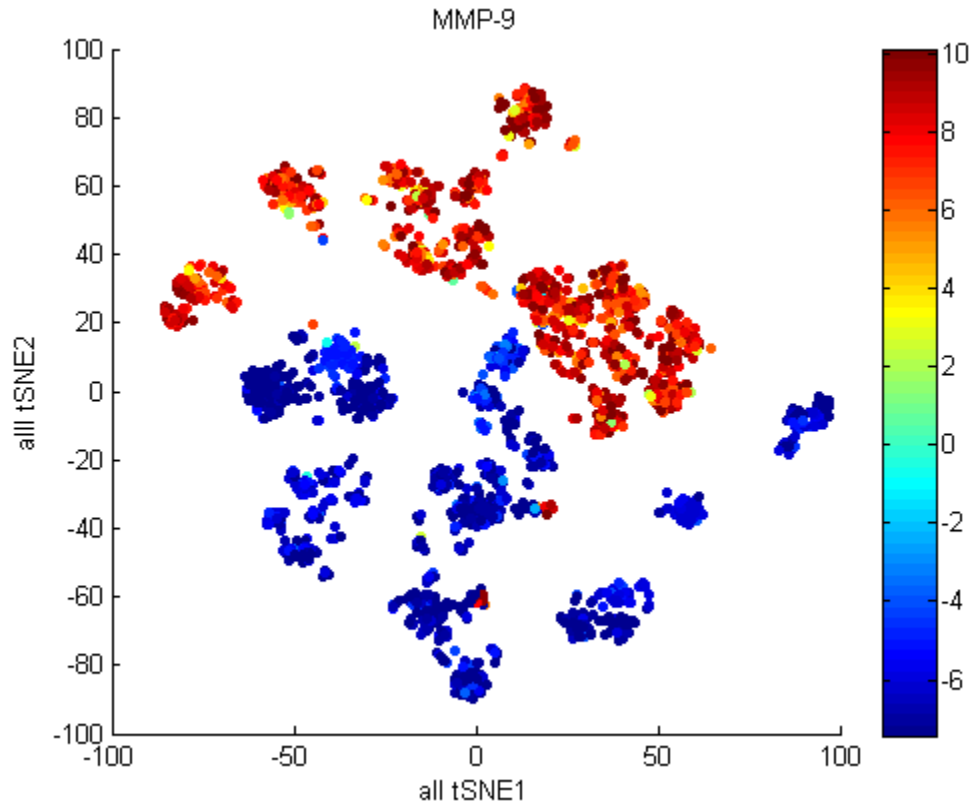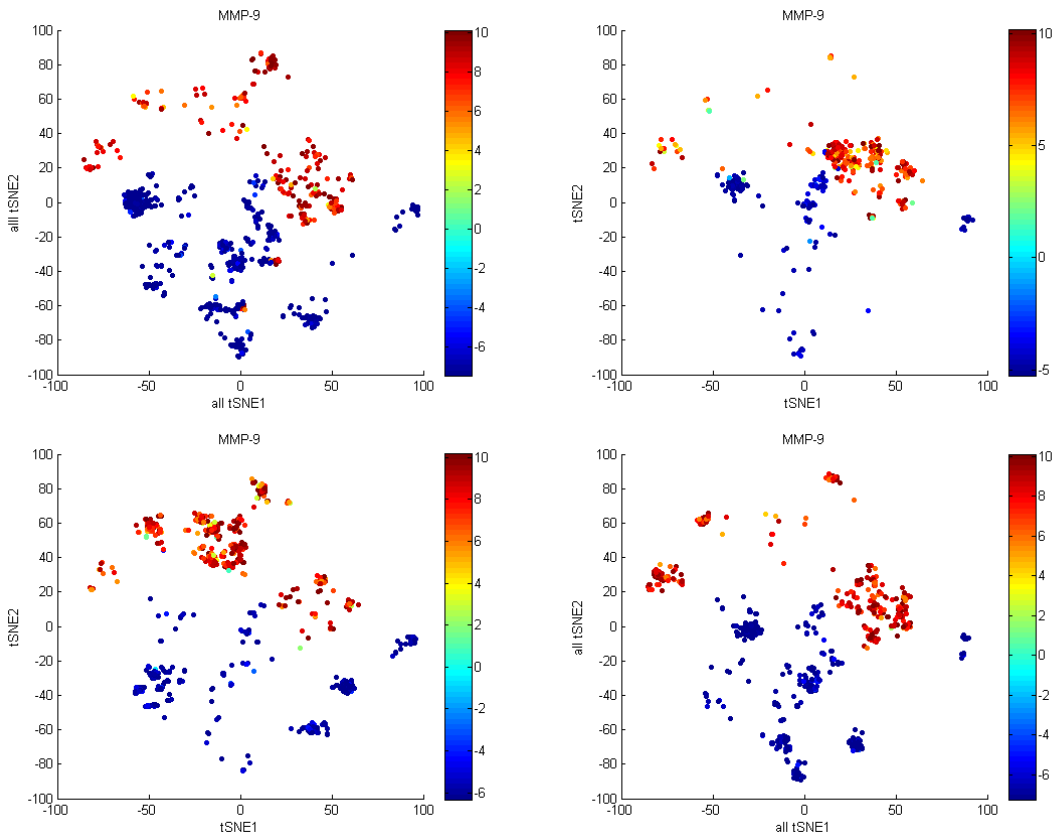

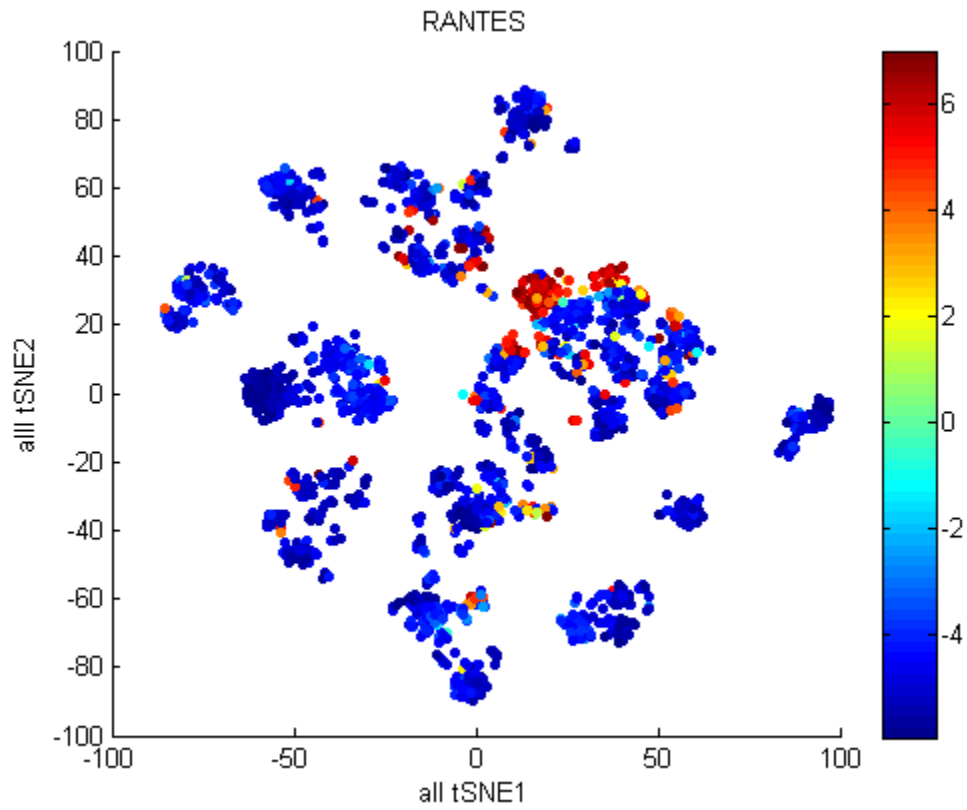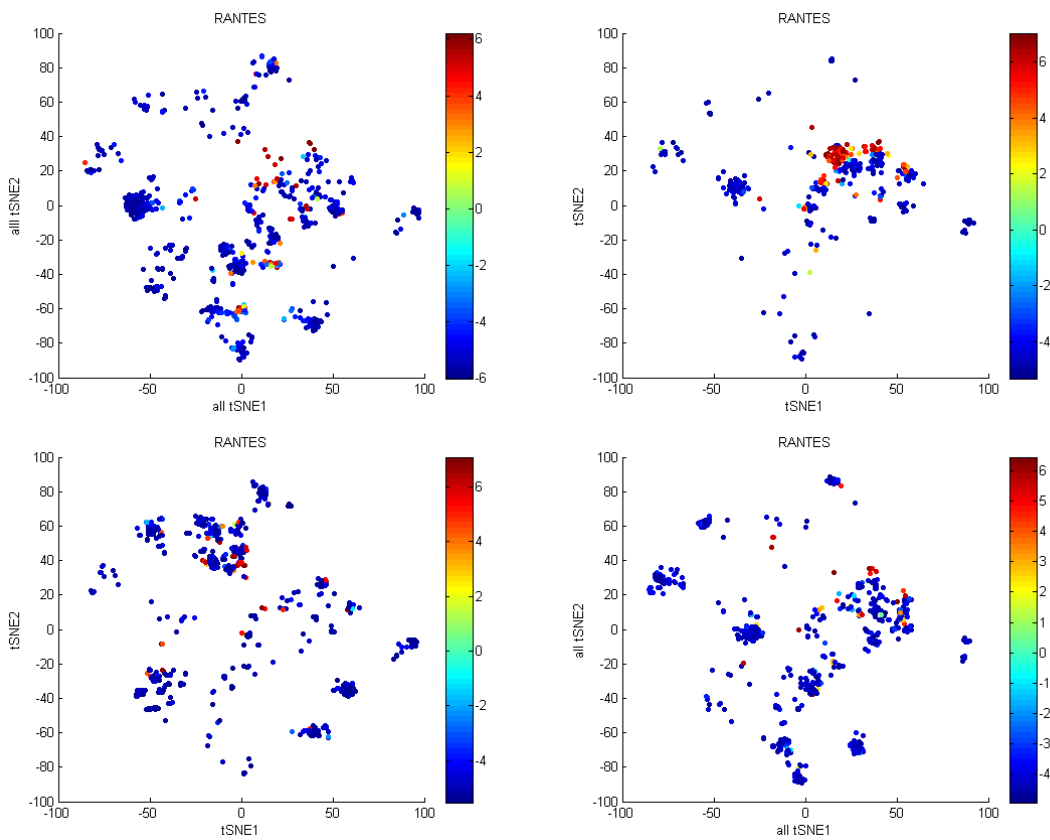

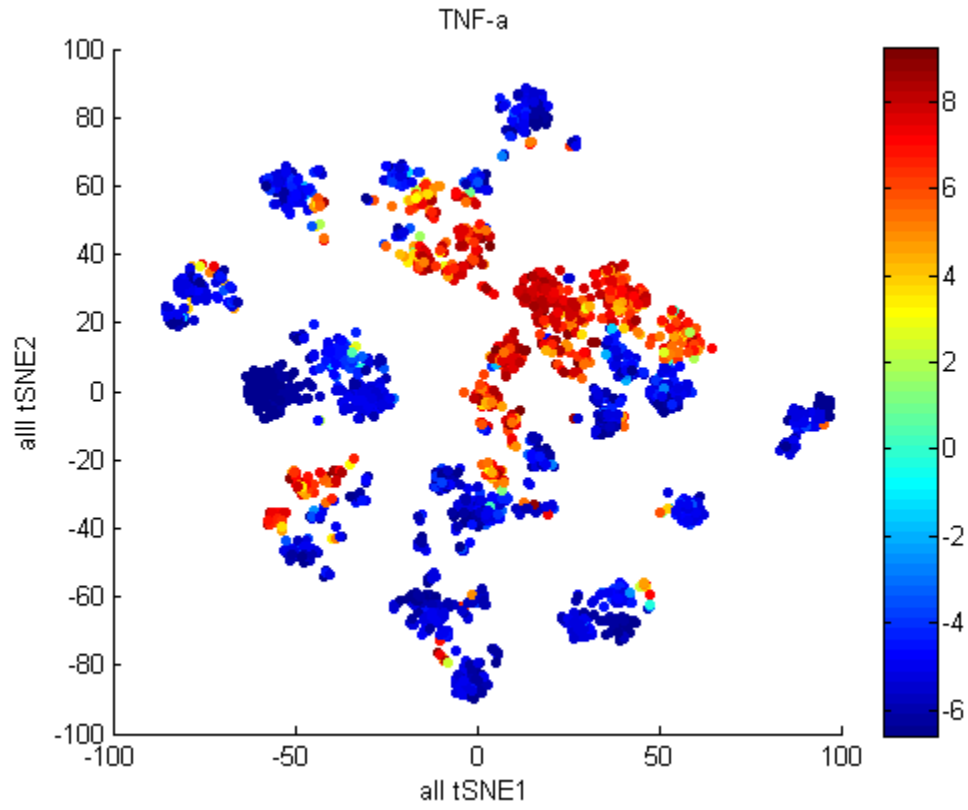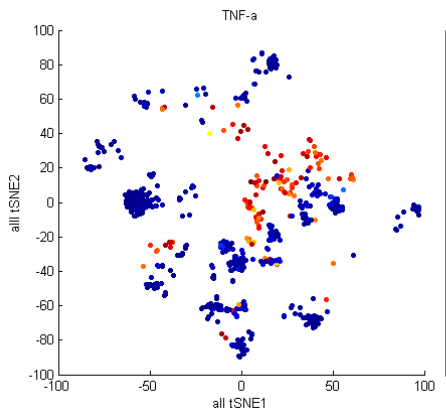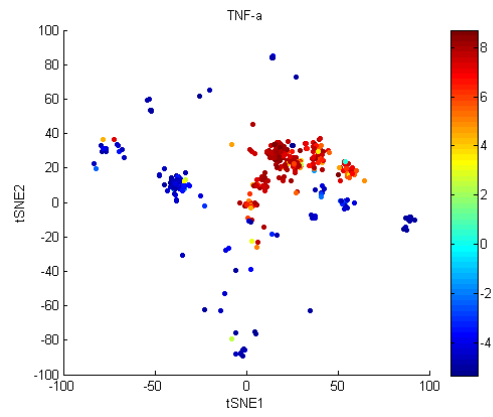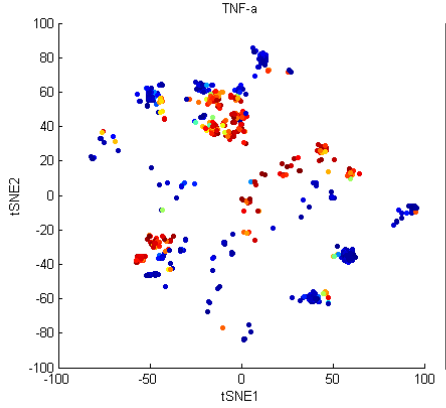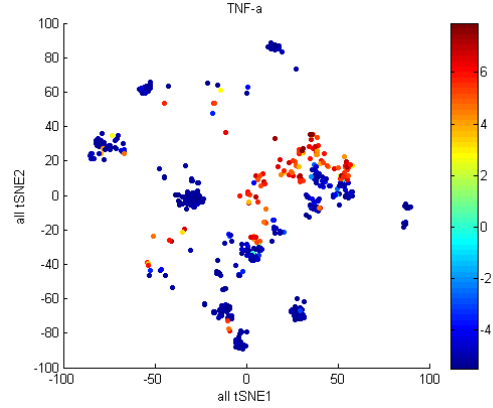



**Fig. S22. Protein distribution in the viSNE maps for primary macrophages derived from a healthy donor.** Cytokine functions in all primary macrophage subpopulations identified by the viSNE analysis. U937 derived macrophage under the stimulation of different TLR ligands (basal, TLR4 by LPS, TLR2 by PAM3, TLR3 by poly IC).

**Table S1:** Summary of antibodies (name, clone, company, catalog) used in this study (most are monoclonal antibodies).

| <b>Protein</b>    | <b>Capture antibody Isotype/clone/vendor/catalog</b> | <b>Detection antibody Isotype/clone/vendor /catalog</b> |
|-------------------|------------------------------------------------------|---------------------------------------------------------|
| <b>IL-1a</b>      | Mouse IgG2A /4414/RD/MAB200                          | Mouse IgG1, κ /364-3B3-14/Biolegend/500104              |
| <b>IL-1b</b>      | Mouse IgG1 /JK1B-1/Biolegend/508202                  | Mouse IgG2b, κ /JK1B-2/Biolegend/508304                 |
| <b>IL-3</b>       | Mouse IgG1 /653A10B1/Invitrogen/ AHC0832             | Rat IgG1, κ /BVD8-3G11/Biolegend/500502                 |
| <b>IL-4</b>       | Mouse IgG1, κ /8D4-8/Biolegend/ 500702               | Rat IgG1, κ /MP4-25D2/Biolegend/ 500802                 |
| <b>IL-5</b>       | Rat IgG2a, κ/JES1-39D10/Biolegend/500902             | Rat IgG2a, κ /JES1-5A10/Biolegend/ 501006               |
| <b>IL-6</b>       | Rat IgG2a, κ /MQ2-39C3/Biolegend/501204              | Rat IgG1, κ /MQ2-13A5/Biolegend/ 501102                 |
| <b>IL-7</b>       | Rat IgG2a, κ /BVD10-11C10/Biolegend/506604           | Rat IgG1, κ /BVD10-40F6/Biolegend/501302                |
| <b>IL-8</b>       | Mouse IgG1, κ /H8A5/Biolegend/511502                 | Mouse IgG1, κ /E8N1/Biolegend/ 511402                   |
| <b>IL-10</b>      | Rat IgG2a, κ/JES3-12G8/Biolegend/ 501504             | Rat IgG1, κ /JES3-9D7/Biolegend/ 501402                 |
| <b>IL-12(p70)</b> | Mouse IgG1/24945/RD/MAB611                           | Rat IgG1, κ /7B12/Biolegend/511002                      |
| <b>IL-13</b>      | Mouse IgG1/32116/RD/MAB213                           | Rat IgG1, κ /JES10-5A2/Biolegend/ 501902                |
| <b>IL-15</b>      | Mouse IgG/RD duoset capture antibody/DY247           | Mouse IgG1/AM00959PU-N/Acris/AM00959PU-N                |
| <b>IL-1RA</b>     | Mouse IgG1 /JK1RA-1/Biolegend/ 509902                | Mouse IgG/RD duoset Capture antibody/DY280              |
| <b>MIF</b>        | Mouse IgG1 Kappa/2A10-4D3/Abnova/H00004282-M01       | Mouse IgG1 Kappa/2A10-4D3/Abnova/H00004282-M01          |
| <b>IL-17A</b>     | Mouse IgG2a, κ /BL127/Biolegend/512603               | Mouse IgG1, κ/BL23/Biolegend/512702                     |
| <b>MCP-1</b>      | Mouse IgG1, κ /5D3-F7/Biolegend/502607               | Armenian Hamster IgG /2H5/Biolegend/ 505902             |
| <b>Rantes</b>     | Mouse IgG2b kappa/VL1/Invitrogen/AHC1052             | Mouse IgG1 /21418/RD/MAB678                             |
| <b>TNF-a</b>      | Mouse IgG1, κ /Mab11/Biolegend /502902               | Mouse IgG1, κ /MAB1/Biolegend/502802                    |
| <b>TNF-b</b>      | Mouse IgG2A /5807/RD/MAB621                          | Mouse IgG1, κ /359-238-8/Biolegend/ 503002              |
| <b>IL-22</b>      | Rat IgG2a, kappaIL22JOP/Ebioscience/16-7222-85       | Mouse IgG1 /142928/RD/MAB7821                           |
| <b>MIP-1b</b>     | Mouse IgG1 kappa/A174E18A7/Invitrogen/AHC6114        | Mouse IgG2B /24006/RD/MAB271                            |
| <b>SCF</b>        | Mouse IgG1 /J231/Peptrotech/500-M44                  | Mouse IgG1/13302/RD/MAB655                              |
| <b>M-CSF</b>      | Mouse IgG2b/AM09180PU-N/Acris/AM09180PU-N            | Mouse IgG2A/ 21113/RD/MAB616                            |
| <b>EGF</b>        | Mouse IgG1/AM09146PU-N/Acris/AM09146PU-N             | Mouse IgG1 /10827/RD/MAB636                             |
| <b>HGF</b>        | Mouse IgG1 /SBF5 C1.7/Novus/NB100-2696               | Mouse IgG1 /24516/RD/MAB694                             |
| <b>NGF-b</b>      | Mouse IgG1, κ /JKhNGF-1/biolegend/509602             | Mouse IgG1, κ /JKmNGF-1/Biolegend/ 509702               |

|                                   |                                            |                                                |
|-----------------------------------|--------------------------------------------|------------------------------------------------|
| <b><i>PDGF</i></b>                | Rabbit IgG/ polyclonal/Acris/PP1061P2      | Mouse IgG1 /108128/RD/MAB1739                  |
| <b><i>VEGF</i></b>                | Mouse IgG1/A183C/Invitrogen/ AHG0114       | Mouse IgG2B/26503/RD/MAB293                    |
| <b><i>IL-2</i></b>                | Mouse IgG2A /5355/RD/MAB602                | Goat IgG /RD duoset detection antibody/DY202   |
| <b><i>MIP-1a</i></b>              | Mouse IgG1/14D7 1G7/Invitrogen/AHC6034     | Goat IgG /RD duoset detection antibody/DY270   |
| <b><i>TGF-a</i></b>               | Goat IgG /RD duoset capture antibody/DY239 | Goat IgG /RD duoset detection antibody/ DY239  |
| <b><i>TGF-b</i></b>               | BD 559119                                  | BD 559119                                      |
| <b><i>G-CSF</i></b>               | Mouse IgG1/3316/RD/MAB214                  | Goat IgG /polyclonal/RD/BAF214                 |
| <b><i>IFN-g</i></b>               | Mouse IgG1, κ /MD-1/Biolegend/507502       | Mouse IgG1, kappa/4S.B3/ebioscience/13-7319-85 |
| <b><i>GMCSF</i></b>               | Rat IgG2a, κ /BVD2-23B6/Biolegend/502202   | Rat IgG2a, κ /BVD2-21C11/Biolegend/502304      |
| <b><i>IL-9</i></b>                | Ebioscience Ready sets go                  | Ebioscience Ready sets go                      |
| <b><i>IL-23</i></b>               | Ebioscience Ready sets go                  | Ebioscience Ready sets go                      |
| <b><i>MMP-2</i></b>               | Mouse IgG/RD duoset capture antibody/DY902 | Mouse IgG/RD duoset detection antibody/DY902   |
| <b><i>MMP-9</i></b>               | Mouse IgG1 /36020/RD/MAB936                | Goat IgG /polyclonal/RD/BAF911                 |
| <b><i>IL-27</i></b>               | Ebioscience Ready sets go                  | Ebioscience Ready sets go                      |
| <b><i>IL-29</i></b>               | Ebioscience Ready sets go                  | Ebioscience Ready sets go                      |
| <b><i>TSLP</i></b>                | Ebioscience Ready sets go                  | Ebioscience Ready sets go                      |
| <b><i>BSA -488 conjugated</i></b> | 488 conjugated BSA                         |                                                |
| <b><i>BSA-532 conjugated</i></b>  | 532 conjugated BSA                         |                                                |
| <b><i>BSA-635 conjugated</i></b>  | 635 conjugated BSA                         |                                                |

**Table S2:** List of all proteins( full name and their functions in human physiology) incorporated in the microchip assay platform.

| <b><i>Protein</i></b> | <b>Full name</b>    | <b>Function</b>                                                 |
|-----------------------|---------------------|-----------------------------------------------------------------|
| <b><i>IL-1a</i></b>   | Interleukin-1 alpha | Inflammation, as well as the promotion of fever and sepsis      |
| <b><i>IL-1b</i></b>   | Interleukin-1 beta  | Cell proliferation, differentiation, and apoptosis.             |
| <b><i>IL-3</i></b>    | Interleukin 3       | Improve the body's natural response to disease                  |
| <b><i>IL-4</i></b>    | Interleukin 4       | Key regulator in humoral and adaptive immunity                  |
| <b><i>IL-5</i></b>    | Interleukin 5       | Stimulates B cell growth and increases immunoglobulin secretion |

|                   |                                            |                                                                                                           |
|-------------------|--------------------------------------------|-----------------------------------------------------------------------------------------------------------|
| <b>IL-6</b>       | Interleukin 6                              | Both a pro-inflammatory cytokine and an anti-inflammatory myokine                                         |
| <b>IL-7</b>       | Interleukin 7                              | T cell maturation                                                                                         |
| <b>IL-8</b>       | Interleukin 8                              | Chemotaxis                                                                                                |
| <b>IL-10</b>      | Interleukin 10                             | Inhibit synthesis of pro-inflammatory cytokine                                                            |
| <b>IL-12(p70)</b> | Interleukin 12 active heterodimer          | Stimulate the growth and function of T cells                                                              |
| <b>IL-13</b>      | Interleukin 13                             | Proliferation of natural killer cells                                                                     |
| <b>IL-15</b>      | Interleukin 15                             | Regulates T and natural killer (NK) cell activation and proliferation                                     |
| <b>IL-1RA</b>     | Interleukin-1 receptor antagonist          | Modulates a variety of interleukin 1 related immune and inflammatory responses.                           |
| <b>MIF</b>        | Macrophage migration inhibitory factor     | Important regulator of innate immunity /Macrophage function                                               |
| <b>IL-17A</b>     | Interleukin 17A                            | Regulates the activities of NF-kappaB and mitogen-activated protein kinases                               |
| <b>MCP-1</b>      | Monocyte chemotactic protein 1             | Recruit monocytes, memory T cells, and dendritic cells to the sites of inflammation                       |
| <b>Rantes</b>     | Chemokine (C-C motif) ligand 5             | Chemotaxis                                                                                                |
| <b>TNF-a</b>      | Tumor necrosis factor alpha                | Acute phase reaction                                                                                      |
| <b>TNF-b</b>      | Tumor Necrosis Factor Beta                 | Acute phase reaction                                                                                      |
| <b>IL-22</b>      | Interleukin 22                             | Potent mediators of cellular inflammatory responses                                                       |
| <b>MIP-1b</b>     | Macrophage inflammatory protein-1 $\beta$  | Chemoattractant for a variety of immune cells                                                             |
| <b>SCF</b>        | Stem Cell Factor                           | Hematopoiesis (formation of blood cells), spermatogenesis, and melanogenesis                              |
| <b>M-CSF</b>      | Macrophage colony-stimulating factor       | Proliferation, differentiation, and survival of monocytes, macrophages, and bone marrow progenitor cells. |
| <b>EGF</b>        | Epidermal growth factor                    | Cell growth, proliferation, differentiation                                                               |
| <b>HGF</b>        | Hepatocyte growth factor                   | Mitogenesis, cell motility, matrix invasion                                                               |
| <b>NGF-b</b>      | Nerve growth factor                        | Important for the growth, maintenance, and survival of certain target neurons                             |
| <b>PDGF</b>       | Platelet-derived growth factor             | Cell proliferation, cell migration, angiogenesis                                                          |
| <b>VEGF</b>       | Vascular endothelial growth factor         | Vasculogenesis, angiogenesis                                                                              |
| <b>IL-2</b>       | Interleukin 2                              | Growth and function of T cells                                                                            |
| <b>MIP-1a</b>     | Macrophage inflammatory protein-1 $\alpha$ | Recruitment and activation of polymorphonuclear leukocytes                                                |
| <b>TGF-a</b>      | Transforming growth factor alpha           | Epithelial development, neural cell proliferation                                                         |

|                                |                                                  |                                                                                                                       |
|--------------------------------|--------------------------------------------------|-----------------------------------------------------------------------------------------------------------------------|
| <i>TGF-<math>\beta</math></i>  | Transforming growth factor beta                  | Proliferation, cellular differentiation                                                                               |
| <i>G-CSF</i>                   | Granulocyte colony-stimulating factor            | Stimulates the survival, proliferation, differentiation, and function of neutrophil precursors and mature neutrophils |
| <i>IFN-<math>\gamma</math></i> | Interferon gamma                                 | Macrophage activation                                                                                                 |
| <i>GM-CSF</i>                  | Granulocyte-macrophage colony-stimulating factor | Granulocyte and monocyte production                                                                                   |
| <i>IL-9</i>                    | Interleukin 9                                    | Regulator of a variety of hematopoietic cells                                                                         |
| <i>IL-23</i>                   | Interleukin 23                                   | Inflammatory response against infection                                                                               |
| <i>MMP-2</i>                   | Matrix metalloproteinase-2                       | Endometrial menstrual breakdown, regulation of vascularization and the inflammatory response                          |
| <i>MMP-9</i>                   | Matrix metalloproteinase 9                       | Breakdown of extracellular matrix in normal physiological processes                                                   |
| <i>IL-27</i>                   | Interleukin 27                                   | Regulating the activity of B- and T-lymphocytes                                                                       |
| <i>IL-29</i>                   | Interleukin 29                                   | Defenses against microbes                                                                                             |
| <i>TSLP</i>                    | Thymic stromal lymphopoietin                     | Maturation of T cell populations                                                                                      |

**Table S3:** Statistic analysis of protein signal measured in U937-derived human macrophage cells (basal vs LPS stimulation).

| Protein       | Detectable above background* | Detectable regulation by LPS** |
|---------------|------------------------------|--------------------------------|
| EGF           | Not detected                 | ---                            |
| G-CSF         | Low confidence               | No difference                  |
| GM-CSF        | High confidence              | Up-regulated                   |
| HGF           | High confidence              | Up-regulated                   |
| IFN- $\gamma$ | High confidence              | No difference                  |
| IL-10         | High confidence              | Up-regulated                   |
| IL-12         | Low confidence               | No difference                  |
| IL-13         | Low confidence               | No difference                  |
| IL-15         | Not detected                 | ---                            |
| IL-17A        | Not detected                 | ---                            |
| IL-1RA        | High confidence              | No difference                  |
| IL-1a         | Not detected                 | No difference                  |
| IL-1b         | High confidence              | No difference                  |
| IL-2          | Not detected                 | ---                            |
| IL-22         | High confidence              | No difference                  |
| IL-23         | Low confidence               | No difference                  |
| IL-27         | Low confidence               | No difference                  |
| IL-29         | High confidence              | No difference                  |
| IL-3          | High confidence              | No difference                  |
| IL-4          | Not detected                 | ---                            |
| IL-5          | High confidence              | No difference                  |

|        |                 |               |
|--------|-----------------|---------------|
| IL-6   | High confidence | Up-regulated  |
| IL-7   | Not detected    | ---           |
| IL-8   | High confidence | Up-regulated  |
| IL-9   | High confidence | No difference |
| MCP-1  | High confidence | No difference |
| MCSF   | Not detected    | ---           |
| MIF    | High confidence | No difference |
| MIP-1a | High confidence | Up-regulated  |
| MIP-1b | High confidence | Up-regulated  |
| MMP-2  | Low confidence  | No difference |
| MMP-9  | High confidence | No difference |
| NGF-b  | Not detected    | ---           |
| PDGF   | High confidence | No difference |
| RANTES | High confidence | No difference |
| SCF    | High confidence | Up-regulated  |
| TGF-a  | High confidence | No difference |
| TGF-b  | Low confidence  | No difference |
| TNF-a  | High confidence | Up-regulated  |
| TNF-b  | Not detected    | ---           |
| TSLP   | High confidence | Up-regulated  |
| VEGF   | High confidence | No difference |

\*Explanation of classifications:

High confidence: 3 out of 3 data sets of single cell intensities

Low confidence: 2 out of 3 data sets of single cell intensities

are statistically different to background intensities. Evaluation was done using bootstrapping and Wilcoxon-Mann-Whitney test with  $\alpha = 0.0012$ .

\*\*Up-regulated: Intensities of up-regulated cytokines are significantly higher in LPS treated single cells as compared to non-treated single cells. Evaluation was performed using bootstrapping and Wilcoxon-Mann-Whitney test with  $\alpha = 0.0012$ .
